# Supplementary material for: Expression pattern analysis of transcribed HERV sequences is complicated by ex vivo recombination
Source: PubMed Central journal article supplement (PMC1904241; doi:10.1186/1742-4690-4-39), 2007-06-06
Supplement: 1742-4690-4-39-S1.pdf [file 1742-4690-4-39-S1.pdf]

## Supplementary information

### Expression pattern analysis of transcribed HERV sequences is complicated by *ex vivo* recombination

Flockerzi et al.

#### Recombination analysis of HERV-KX sequences with RECCO

RECCO [1] is a novel method for analyzing sequences subject to recombination. Given costs for recombination and for mutation events, RECCO finds all cost-optimal explanations of the putative recombinant sequence in terms of recombination and mutation of a given set of aligned sequences. A high recombination cost results in an explanation that only uses the single, most related reference sequence without any recombination events. As the recombination cost decreases, more and more recombination events are introduced in the explanation in favor of mutation events. The first recombination event reduces the number of mutations needed for an explanation by the largest factor. RECCO builds a list of recombination events and displays the amount of mutation cost saved by each recombination – the so called “savings” of a recombination. RECCO also computes the total mutation cost of the explanation that includes this recombination event (see Table 2). True recombinant sequences usually display a strong reduction in mutation cost (i.e. a high savings value) for the first few recombination events introduced.

To quantify the statistical significance of each recombination event, RECCO generates sets of alignments by permuting the columns of the alignment. As a result, the permuted alignments do not contain any recombination signal, but have the same diversity as the original alignment. P-values are then estimated by computing the probability of obtaining higher savings than observed in the given alignment purely by chance, based on the analysis of the set of permuted alignments. We report the p-values for the query sequence here, as our goal was to analyze the recombination signal for the query sequence only.

### **Treatment of gaps in RECCO analysis**

Treating gaps correctly was critical for the analysis of the HERV-KX sequences, as the multiple alignment contained two long gaps and several small gaps. Recently published recombination detection methods usually implement one of the three following options: (i) discard sites that contain a gap character, (ii) treat each gap character as a fifth nucleotide state or (iii) treat each consecutive run of columns containing gaps as a large polymorphism (Geneconv [2]). The first option results in an unacceptable loss of information, in our case. For example, the 96 bp indel differentiates between evolutionarily young and old HERV-KX sequences [3]. The second option may lead to an artificially high similarity or dissimilarity between sequences in gap regions and eventually produces spurious recombination events. The third option prohibits recombinations in any run of columns containing a gap, such that a sequence containing a long gap may confound recombinations that involve other sequences. It is also difficult to choose an adequate scoring term for the resulting large polymorphisms. In conclusion, all existing approaches for treating gaps either discard a lot of information and thus miss recombination events or may infer spurious recombination events solely based on gap information.

We decided to implement an approach that discriminates between possibly spurious recombination events based on gap information and recombination events based on polymorphisms. First, it is important to realize that gaps in the query sequence have a different quality than gaps in the sequences used for an explanation. If gaps in the query sequence are matched with nucleotides in the explanation, the involved sequence in the explanation represents irrelevant information. Hence, gaps in the query sequence are assigned zero cost, such that all columns with a gap in the putative recombinant are effectively removed from the alignment. The situation is totally different if nucleotides in the query sequence are matched with a gap in the explanation. In this case, there is missing information as the query sequence is not fully explained by the other sequences. Consequently, we have chosen to penalize gaps in the explanation.

To capture the effect of the gap penalty on inferred recombination events, we executed RECCO [1] for all gap penalties in the set {0.016, 0.02, 0.04, 0.07, 0.1, 0.2, 0.4, 0.6, 0.8}. As gaps were strongly preferred for gap penalties below 0.016 and resulted in spurious recombination events, we did not consider smaller gap penalties than 0.016. The results were then preprocessed as follows: recombination events with a p-value above 0.05 were discarded as not significant. If a recombination event with the same start and end position was detected as significant for all gap penalties, it was accepted as correct. Other recombination events were

manually examined and consolidated. In the tables displaying recombination events, we only report the sequence p-value for the default gap penalty of 0.2.

## References

1. Maydt J, Lengauer T: **Recco: recombination analysis using cost optimization.** *Bioinformatics* 2006, **22**:1064-1071.
2. Sawyer S: **Statistical tests for detecting gene conversion.** *Mol Biol Evol* 1989, **6**:526-538.
3. Mayer J, Meese E, Mueller-Lantsch N: **Human endogenous retrovirus K homologous sequences and their coding capacity in Old World primates.** *J Virol* 1998, **72**:1870-1875.

**Following pages:**

**Original RECCO output for HERV-KX sequences "B270", "93" and "94"**

**Multiple alignment of HERV-KX and HML-2 reference sequences, provided in fasta format.**

**Reproduction of HERV-K(HML-2) gag sequence recombinants**







|          | 3                                                                                                                                                                  | 3                                                                                                                                 | 3 | 3 | 3 | 3 | 3 | 3 | 3 | 4 | 4 | 4 | 4 | 4 | 4 | 4 | 4 | 4 | 4 |   |   |   |   |
|----------|--------------------------------------------------------------------------------------------------------------------------------------------------------------------|-----------------------------------------------------------------------------------------------------------------------------------|---|---|---|---|---|---|---|---|---|---|---|---|---|---|---|---|---|---|---|---|---|
|          | 5                                                                                                                                                                  | 5                                                                                                                                 | 6 | 6 | 7 | 7 | 8 | 8 | 9 | 9 | 0 | 0 | 1 | 1 | 2 | 2 | 3 | 3 | 4 | 4 | 5 | 5 | 6 |
| 10_019   | -----TTAATCATA CGGCACCACCTAGTAGACAGGGTAGTGAATTACATGAAATTATTGATAAA-----TCAAGAAAAGGAAGGA                                                                             |                                                                                                                                   |   |   |   |   |   |   |   |   |   |   |   |   |   |   |   |   |   |   |   |   |   |
| 10_310   | -----TTAATCCTA CGGCACCACCTAGTAGACAGGGTAGTGAATTACATGAAATTATTGATAAA-----TCAAGAAAAGGAAGGA                                                                             |                                                                                                                                   |   |   |   |   |   |   |   |   |   |   |   |   |   |   |   |   |   |   |   |   |   |
| 11_233   | -----G C C C A T T T G G G                                                                                                                                         |                                                                                                                                   |   |   |   |   |   |   |   |   |   |   |   |   |   |   |   |   |   |   |   |   |   |
| 11_277   | -----TTAATCCTA CAGCACCACCTAGTGACAGGGTAGTGAATTACATGAAATTATTGATAAA-----GCAAGAAAACAAGGA                                                                               |                                                                                                                                   |   |   |   |   |   |   |   |   |   |   |   |   |   |   |   |   |   |   |   |   |   |
| 11_424   | -----TTAATCCTA CGGCACCACCTAGTAGACAGGGTAGTGAATTACATGAAATTATTGATAAA-----TCAAGAAAAGGAAGGA                                                                             |                                                                                                                                   |   |   |   |   |   |   |   |   |   |   |   |   |   |   |   |   |   |   |   |   |   |
| 11_456   | -----TTAATCCTA CGGCACC G C C T A G T A G A C A G G G T A G T G A A T T A C A T G A A A T T A T T G A T A A A -----AGAAAAGGAAGGA                                    |                                                                                                                                   |   |   |   |   |   |   |   |   |   |   |   |   |   |   |   |   |   |   |   |   |   |
| 12_216   | -----TTAATCCTA CGGCACCACCTAGTAGACAGGGTAGTGAATTACATGAAATTATTGATAAA-----TCAAGAAAAGGAAGGA                                                                             |                                                                                                                                   |   |   |   |   |   |   |   |   |   |   |   |   |   |   |   |   |   |   |   |   |   |
| 12_419   | -----G C C T G T T - G G G                                                                                                                                         |                                                                                                                                   |   |   |   |   |   |   |   |   |   |   |   |   |   |   |   |   |   |   |   |   |   |
| 14_023   | -----TTGATCCTA CACTACCACCTAGTGACAGAGTAGTGCACTGCACAAAAATCATTGATAAA-----G C C A G A A A C A G G G A                                                                  |                                                                                                                                   |   |   |   |   |   |   |   |   |   |   |   |   |   |   |   |   |   |   |   |   |   |
| 16_010   | GCGCTGTGTCCTCAGCCGCCCACTATGAGAC                                                                                                                                    | TTAATCCAA CAGCACCACCTAGTGACAGGGTAGTGAATTACATGAAATTATTGATAAA-----G C T A G A A A C A G G G A                                       |   |   |   |   |   |   |   |   |   |   |   |   |   |   |   |   |   |   |   |   |   |
| 17_029   | -----G C C A G A A A C A A A G G A                                                                                                                                 |                                                                                                                                   |   |   |   |   |   |   |   |   |   |   |   |   |   |   |   |   |   |   |   |   |   |
| 19_157   | -----TTAATCCTA CAT CACCACCTAGTAGACAGGGTGGTGCATTACATAAAATTATT-----AAA-----G C A A G A A A C A A A G G A                                                             |                                                                                                                                   |   |   |   |   |   |   |   |   |   |   |   |   |   |   |   |   |   |   |   |   |   |
| 19_238   | -----TTAATCCTA T G G T A C C A C C T A G T A G A C A G G G T A G T G A A T T A C A G A A A T T A T T G A T A A A -----TCAAGAAAAGGAAGGA                             |                                                                                                                                   |   |   |   |   |   |   |   |   |   |   |   |   |   |   |   |   |   |   |   |   |   |
| 19_352   | -----TTAATCCTA CGGCACCACCTAGTAGACAGGGTAGTGAATTACATGAAATTATTGATAAA-----TCAAGAAAAGGAAGGA                                                                             |                                                                                                                                   |   |   |   |   |   |   |   |   |   |   |   |   |   |   |   |   |   |   |   |   |   |
| 19_407   | -----TTAATCCTA C A C C A C C A C C T A G T G A C A G G G T A G T G C A T T A C A T A A A A T T A T T G A T A A A -----G C A A G A A A C A A A G G A                |                                                                                                                                   |   |   |   |   |   |   |   |   |   |   |   |   |   |   |   |   |   |   |   |   |   |
| 19_639   | -----G T C A T A - G G G                                                                                                                                           |                                                                                                                                   |   |   |   |   |   |   |   |   |   |   |   |   |   |   |   |   |   |   |   |   |   |
| 1_059    | -----TTAATCCTA CAT CACCACCTAGTGACAGGGTAGTACACTGCATGAAATCATTGATAAA-----G C C A G A A A C A G G G A                                                                  |                                                                                                                                   |   |   |   |   |   |   |   |   |   |   |   |   |   |   |   |   |   |   |   |   |   |
| 1_061    | -----TTAATCCTA CAT CACCACCTAGTGACAGGGTAGTACACTGCATGAAATCATTGATAAA-----G C C A G A A A C A G G G A                                                                  |                                                                                                                                   |   |   |   |   |   |   |   |   |   |   |   |   |   |   |   |   |   |   |   |   |   |
| 1_259    | -----TTAATCCTA T G G C A C C A C C T A G T A G A C A G G G T A G T G A A T T A C A T G A A A T T A T T G A T A A A -----TCAAGAAAAGGAAGGA                           |                                                                                                                                   |   |   |   |   |   |   |   |   |   |   |   |   |   |   |   |   |   |   |   |   |   |
| 1_504    | -----TTAATCCTA CGGCACCACCTAGTAGACAGGGTAGTGAATTACATGAAATTATTGATAAA-----TCAAGAAAAGGAAGGA                                                                             |                                                                                                                                   |   |   |   |   |   |   |   |   |   |   |   |   |   |   |   |   |   |   |   |   |   |
| 1_555    | -----A A T C C T A T G G C A C C A C C T A G T A G A C A G G G T A G T G A A T T A C A T G A A A T T A T T G A C A A C -----TCAAGAAAAGGAAGGA                       |                                                                                                                                   |   |   |   |   |   |   |   |   |   |   |   |   |   |   |   |   |   |   |   |   |   |
| 20_078   | -----TTAATCCTA C A C C A C C A C C T A G T G A C A G G G T G T G C A T T A C A T G A A A T T A T T G A T A A A -----G C A G A A A C A A G G A                      |                                                                                                                                   |   |   |   |   |   |   |   |   |   |   |   |   |   |   |   |   |   |   |   |   |   |
| 21_019   | -----TTAATCCTA CGGCACCACCTAGTAGACAGGGTAGTGAATTACATGAAATTATTGATAAA-----TCAAGAAAAGGAAGGA                                                                             |                                                                                                                                   |   |   |   |   |   |   |   |   |   |   |   |   |   |   |   |   |   |   |   |   |   |
| 22_012   | -----TTAATCCTA CGGCACCACCTAGTAGACAGGGTAGTGAATTACATGAAATTATTGATAAA-----TCAAGAAAAGGAAGGA                                                                             |                                                                                                                                   |   |   |   |   |   |   |   |   |   |   |   |   |   |   |   |   |   |   |   |   |   |
| 22_041   | GCGCTGTATCCTCAGCCGCCCACTGTGAGAC                                                                                                                                    | TTAATCCTA CAGCAT CAC T A G T G A C A G G G T G T G C A C T G C A T G C A G T C A T T G A T G A A -----G C C A G A A A C A G G C C |   |   |   |   |   |   |   |   |   |   |   |   |   |   |   |   |   |   |   |   |   |
| 2_Tan    | -----TTAATCCTA CGGCACCACCTAGTAGACAGGGTAGTAAATTACATGAAATTATTGATAAA-----TCAAGAAAAGGAAGGA                                                                             |                                                                                                                                   |   |   |   |   |   |   |   |   |   |   |   |   |   |   |   |   |   |   |   |   |   |
| 3_014    | -----TTAATCCTA C A G C A C C A C C T A T A G A C A G G G T A G T G C A T T A C A T A A A A T T A T T G A T A A G -----TCAAGAAAAGCAAGGA                             |                                                                                                                                   |   |   |   |   |   |   |   |   |   |   |   |   |   |   |   |   |   |   |   |   |   |
| 3_209    | -----TTGATCCTA C A G C A C C A C C T A G T G A C A A G A T G T G C A C T G C A T G A C C A T T G C T A C A -----G C C A G A A A C A G G G A                        |                                                                                                                                   |   |   |   |   |   |   |   |   |   |   |   |   |   |   |   |   |   |   |   |   |   |
| 3_294    | -----TTAATCCTA C A G C A T C A C T A G T G A C A G G G T G T A C A C T G C A C G C A G T C A T T G A T G A A -----G C C A G A A A C A G G G A                      |                                                                                                                                   |   |   |   |   |   |   |   |   |   |   |   |   |   |   |   |   |   |   |   |   |   |
| 3_354    | -----TTAATCCTA CGGCACCACCTAGTAGACAGGGTAGTGAATTACATGAAATTATTGATAAA-----TCAAGAAAAGGAAGGA                                                                             |                                                                                                                                   |   |   |   |   |   |   |   |   |   |   |   |   |   |   |   |   |   |   |   |   |   |
| 3_385    | -----TTAATCCTA T G G C A C C A C C T A G T A G A C A G G G T A G T G A A T T A C A T G A A A T T A T T G A T A A A -----TCAAGAAAAGGAAGGA                           |                                                                                                                                   |   |   |   |   |   |   |   |   |   |   |   |   |   |   |   |   |   |   |   |   |   |
| 3_496    | -----TTAATCCTA CGGCACCACCTAGTAGACAGGGTAGTGAATTACATGAAATTATTGATAAA-----TCAAGAAAAGGAAGGA                                                                             |                                                                                                                                   |   |   |   |   |   |   |   |   |   |   |   |   |   |   |   |   |   |   |   |   |   |
| 3_610    | -----TTAATCCTA CGGCACCACCTAGTAGACAGGGTAGTGAATTACATGAAATTATTGATAAA-----TCAAGAAAAGGAAGGA                                                                             |                                                                                                                                   |   |   |   |   |   |   |   |   |   |   |   |   |   |   |   |   |   |   |   |   |   |
| 4_008    | -----TTAATCCTA T G G C A C C A C C T A G T A G A C A G G G T A G T G A A T T A C A T G A A A T T A T T G A T A A A -----TCAAGAAAAGGAAGGA                           |                                                                                                                                   |   |   |   |   |   |   |   |   |   |   |   |   |   |   |   |   |   |   |   |   |   |
| 4_032    | -----TTGATCCTA C A G T A C C A C C T A G T G A C A A G A T A G T G C A C T G C A T G A C C A T T G C T A C A -----G C C A G A A A C A G G G A                      |                                                                                                                                   |   |   |   |   |   |   |   |   |   |   |   |   |   |   |   |   |   |   |   |   |   |
| 4_052    | -----TTGATCCTA C A G T A C C A C C T A G T G A C A A G A T A G T G C A C T G C A T G A C C A T T G C T A C A -----G C C A G A A A C A G G G A                      |                                                                                                                                   |   |   |   |   |   |   |   |   |   |   |   |   |   |   |   |   |   |   |   |   |   |
| 4_068    | -----TTGATCCTA C A G T A C C A C C T A G T G A C A A G A T A G T G C A C T G C A T G A C C A T T G C T A C A -----G C C A G A A A C A G G G A                      |                                                                                                                                   |   |   |   |   |   |   |   |   |   |   |   |   |   |   |   |   |   |   |   |   |   |
| 4_716    | -----TTAATCCTA CGGCACCACCTAGTAGACAGGGTAGTGAATTACATGAAATTATTGATAAA-----TCAAGAAAAGGAAGGA                                                                             |                                                                                                                                   |   |   |   |   |   |   |   |   |   |   |   |   |   |   |   |   |   |   |   |   |   |
| 4_742    | -----TTAATCCTA T G G C A C C A C C T A G T A G A C A G G G T A G T G C A T T A C A T A A A A T T A T T G T C A A G A A A T T A T A G T C A A G A A A G C A A G G A |                                                                                                                                   |   |   |   |   |   |   |   |   |   |   |   |   |   |   |   |   |   |   |   |   |   |
| 5_147    | -----TTAATCCTA T G G C A C C A C C T A G T A G A C A G G G T A G T G A A T T A C A T G A A A T T A T T G A T A A A -----TCAAGAAAAGGAAGGA                           |                                                                                                                                   |   |   |   |   |   |   |   |   |   |   |   |   |   |   |   |   |   |   |   |   |   |
| 5_259    | -----TTAATCCAA C A G C A C C A C C T A G T C A A C A G G G T A G T G C G T T A C A T A A A A T T A T T G A T A A A -----TCAAGAAAAGGAAGGA                           |                                                                                                                                   |   |   |   |   |   |   |   |   |   |   |   |   |   |   |   |   |   |   |   |   |   |
| 5_535    | -----TTGATCCTA C A G C A C C A C T A G T G T A C A A G A T A G T A C A C T G C A T A A A A C C A T T -----A-----G C C A G A A A C A G G G A                        |                                                                                                                                   |   |   |   |   |   |   |   |   |   |   |   |   |   |   |   |   |   |   |   |   |   |
| 5_544    | -----TTAATCCTA T G G C A C C A C C T A G T A G A C A G G G T A G T G A A T T A C A T G A A A T T A T T G A T A A A -----TCAAGAAAAGGAAGGA                           |                                                                                                                                   |   |   |   |   |   |   |   |   |   |   |   |   |   |   |   |   |   |   |   |   |   |
| 6_098    | -----TTAATCCTA C A G C A C T A C C T A G T G A C A G C A T A G T G C A T T A C A T A A A A T T A T T G A T A A A -----G C A A G A A A C A A A G G A                |                                                                                                                                   |   |   |   |   |   |   |   |   |   |   |   |   |   |   |   |   |   |   |   |   |   |
| 6_178    | -----TTAATCCTA C C G C A C C A C C T A G T G A C A A G G T A G T A C A C T G C A T G A A A T T A T T G A T A A A -----G C C A C T A A C A G G G A                  |                                                                                                                                   |   |   |   |   |   |   |   |   |   |   |   |   |   |   |   |   |   |   |   |   |   |
| 6_240    | -----G C C A T T - G G G                                                                                                                                           |                                                                                                                                   |   |   |   |   |   |   |   |   |   |   |   |   |   |   |   |   |   |   |   |   |   |
| 6_324    | -----TTAATCCTA CGGCACCACCTAGTAGACAGGGTAGTGAATTACATGAAATTATTGATAAA-----TCAAGAAAAGGAAGGA                                                                             |                                                                                                                                   |   |   |   |   |   |   |   |   |   |   |   |   |   |   |   |   |   |   |   |   |   |
| 7_345    | -----TTAATCCTA CGGCACCACCTAGTAGACAGGGTAGTGAATTACATGAAATTATTGATAAA-----TCAAGAAAAGGAAGGA                                                                             |                                                                                                                                   |   |   |   |   |   |   |   |   |   |   |   |   |   |   |   |   |   |   |   |   |   |
| 7_450    | -----TTAATCCTA C A G C A C C A C C T A G T G A C A G G G T A G T G A T T A C A T A A A A T T A T T G A T G A C -----G C A A G A A A C A A A G A                    |                                                                                                                                   |   |   |   |   |   |   |   |   |   |   |   |   |   |   |   |   |   |   |   |   |   |
| 8_047    | -----TTGATCCTA C G G T A C C A C C T A G T G A C A A G A T A G T G C A C T G C A T G A C C A T T G C T A C A -----G C C A G A A A C A G G G A                      |                                                                                                                                   |   |   |   |   |   |   |   |   |   |   |   |   |   |   |   |   |   |   |   |   |   |
| 8_074    | -----TTGATCCTA C G G T A C C A C C T A G T G A C A A G A T A G T G C A C T G C A T G A C C A T T G C T A C A -----G C C A G A A A C A G G G A                      |                                                                                                                                   |   |   |   |   |   |   |   |   |   |   |   |   |   |   |   |   |   |   |   |   |   |
| 8_094    | -----TTGATCCTA C G G T A C C A C C T A G T G A C A A G A T A G T G C A C T G C A T G A C C A T T G C T A C A -----G C C A G A A A C A G G G A                      |                                                                                                                                   |   |   |   |   |   |   |   |   |   |   |   |   |   |   |   |   |   |   |   |   |   |
| 8_121    | -----G C C T T T - G G G                                                                                                                                           |                                                                                                                                   |   |   |   |   |   |   |   |   |   |   |   |   |   |   |   |   |   |   |   |   |   |
| 8_235    | -----G C C T T T - G G G                                                                                                                                           |                                                                                                                                   |   |   |   |   |   |   |   |   |   |   |   |   |   |   |   |   |   |   |   |   |   |
| 8_525    | -----TTAATCCTA CGGCACCACCTAGTAGACAGGGTAGTGAATTACATGAAATTATTGATAAA-----TCAAGAAAAGGAAGGA                                                                             |                                                                                                                                   |   |   |   |   |   |   |   |   |   |   |   |   |   |   |   |   |   |   |   |   |   |
| 8_559    | -----TTGATCCTA C A G T A C C A G T A G T G A C A A G A T A G T G C A C T G C A T G A C C G G T T G A T A C A -----G C C A G A A A C A G G G A                      |                                                                                                                                   |   |   |   |   |   |   |   |   |   |   |   |   |   |   |   |   |   |   |   |   |   |
| 9_307    | -----G C C A T T - G G G                                                                                                                                           |                                                                                                                                   |   |   |   |   |   |   |   |   |   |   |   |   |   |   |   |   |   |   |   |   |   |
| 9_340    | -----G T A A T C C T A C A G C A C C A C T A G T G A C A G G G T C G T G C A T T A C A T A A A A T T A T T G A A A A G -----A C A -----A A C A A A G G G           |                                                                                                                                   |   |   |   |   |   |   |   |   |   |   |   |   |   |   |   |   |   |   |   |   |   |
| HML2_Rep | -----TTAATCCTA CGGCACCACCTAGTAGACAGGGTAGTAAATTACATGAAATTATTGATAAA-----TCAAGAAAAGGAAGGA                                                                             |                                                                                                                                   |   |   |   |   |   |   |   |   |   |   |   |   |   |   |   |   |   |   |   |   |   |
| K113     | -----TTAATCCTA CGGCACCACCTAGTAGACAGGGTAGTGAATTACATGAAATTATTGATAAA-----TCAAGAAAAGGAAGGA                                                                             |                                                                                                                                   |   |   |   |   |   |   |   |   |   |   |   |   |   |   |   |   |   |   |   |   |   |
| K115     | -----TTAATCCTA CGGCACCACCTAGTAGACAGGGTAGTGAATTACATGAAATTATTGATAAA-----TCAAGAAAAGGAAGGA                                                                             |                                                                                                                                   |   |   |   |   |   |   |   |   |   |   |   |   |   |   |   |   |   |   |   |   |   |
| X_540    | -----G C C G T C - A G G                                                                                                                                           |                                                                                                                                   |   |   |   |   |   |   |   |   |   |   |   |   |   |   |   |   |   |   |   |   |   |
| Y_026    | -----TTGATCCTA C A G T A C C A C C T A G T G A C A A G A T A G T G C A C T C C A T G A A A T C A T T G A T A A A -----G C C A G A A A C A G G G A                  |                                                                                                                                   |   |   |   |   |   |   |   |   |   |   |   |   |   |   |   |   |   |   |   |   |   |
| B270     | -----TTAATCCTA T G G C A C C A C C T A G T A G A C A G G G T A G T G A A T T A C A T G A A A T T A T T G A T A A A -----TCAAGAAAAGGAAGGA                           |                                                                                                                                   |   |   |   |   |   |   |   |   |   |   |   |   |   |   |   |   |   |   |   |   |   |

4 4 4 4 4 4 4 5 5 5 5 5 5 5 5 5 5 5 5 5
6 7 7 8 8 9 9 0 0 1 1 2 2 3 3 4 4 5 5 6 6 7 7
5 0 5 0 5 0 5 5 5 5 5 5 5 5 5 5 5 5 5 5
10\_019 GA--CACTGAGGCGTGGCAATFCCAGTAACTTTAGAACCGATACCACCTGGAGAAGGA-----GCCCAAGAGGGAGAGCCTCCACAGTTGAGGCCAGATACAAGTCT
10\_310 GA--TACTGAGGCGTGGCAATFCCAGTAACTTTAGAACCGATACCACCTGGAGAAGGA-----GCCCAAGAGGGAGAGCCTCCACAGTTGAGGCCAGATACAAGTCT
11\_233 GC---TAAACACAGATGGCCACC--TCTCTCAGCCGAGTGAGTGTGGGAGGCG-----AGCCTGAACACTAGGCTCACTGTGACTCA-TTGTGCGACCCATTA
11\_277 GA--TATGAGGCGTGGCAATFCCAGTAACTTTAGAACCGATACCACCTGGAGAAGGA-----GCCCAAGAGGGAGAGCCTCCACAGTTGAGGCCAGATACAAGTCT
11\_424 GA--TACTGAGGCGTGGCAATFCCAGTAACTTTAGAACCGATACCACCTGGAGAAGGA-----GCCCAAGAGGGAGAGCCTCCACAGTTGAGGCCAGATACAAGTCT
11\_456 GA--TACTGAGGCGTGGCAATFCCAGTAACTTTAGAACCGATACCACCTGGAGAAGGA-----GCCCAAGAGGGAGAGCCTCCACAGTTGAGGCCAGATACAAGTCT
12\_216 GA--TACTGAGGCGTGGCAATFCCAGTAACTTTAGAACCGATACCACCTGGAGAAGGA-----GCCCAAGAGGGAGAGCCTCCACAGTTGAGGCCAGATACAAGTCT
12\_419 GT---TAAACACAGATGGCCACC--TCTCTCAGCCGAGTGAGTGTGGGAGGCG-----AGCCTGAACACTAGGCTCACTGTGACTCA-TTGTGCGACCCATTA
14\_023 GA--TCTGAGGCGAGGCACTTCCGTAATTTTACAACCAATACCAGCTGGAAAACGG-----AGTCAACAGGAGCCTGTGTCACCAACTGAGGCTAGATATGATCT
16\_010 GA--TCTGAGGCGTGGCAATFCCAGTAACTTTAGAACCGATACCACCTGGAGAAGGA-----GCTCAACAGGAGCAGCTGTGTCACCAACTGAGGCTAGATATGATCT
17\_029 -----
19\_157 GA--TATGAGGCGTGGCACTTCCAGTAACTTTAGAACCGATACCACCTGGAGAAGGA-----GCCCAAGAGGGAGAGCCTCCCTAGCTGAGGCCAGATACAAGTCT
19\_238 GAGATGAGGCGTGGCAATFCCAGTAACTTTAGAACCGATACCACCTGGAGAAGGA-----GCCCAAGAGGGAGAGCCTCCACAGTTGAGGCCAGATACAAGTCT
19\_352 GA--TACTGAGGCGTGGCAATFCCAGTAACTTTAGAACCGATACCACCTGGAGAAGGA-----GCCCAAGAGGGAGAGCCTCCACAGTTGAGGCCAGATACAAGTCT
19\_407 GA--TACTGAGGCGTGGCAATFCCAGTAACTTTAGAACCGATACCACCTGGAGAAGGA-----GCCCAAGAGGGAGAGCCTCCCTAGCTGAGGCCAGATACAAGTCT
19\_639 GC---TAAACACAGATGGCCACC--TCTCTCAGCCGAGTGAGTGTGGGAGGCG-----AGCCTGAACACTAGGCTCACTGTGACTCA-TTGTGCGACCCATTA
1\_059 GA--TCTGAGGCGTGGCACTTCCGTAATTTTACAACCAATACCAGCTGGAAAACGG-----GGCAACCTGGAGCCTGTGTCACCAACTGAGGCTAGATATGATCT
1\_061 GA--TCTGAGGCGTGGCACTTCCGTAATTTTACAACCAATACCAGCTGGAAAACGG-----GGCAACCTGGAGCCTGTGTCACCAACTGAGGCTAGATATGATCT
1\_259 GA--TACTGAGGCGTGGCAATFCCAGTAACTTTAGAACCGATACCACCTGGAGAAGGA-----GCCCAAGAGGGAGAGCCTCCACAGTTGAGGCCAGATACAAGTCT
1\_504 GA--TACTGAGGCGTGGCAATFCCAGTAACTTTAGAACCGATACCACCTGGAGAAGGA-----GCCCAAGAGGGAGAGCCTCCACAGTTGAGGCCAGATACAAGTCT
1\_555 GA--TACTGAGGCGTGGCAATFCCAGTAACTTTAGAACCGATACCACCTGGAGAAGGA-----GCCCAAGAGGGAGAGCCTCCACAGTTGAGGCCAGATACAAGTCT
20\_078 GAGATGAGGCGTGGCAATFCCAGTAACTTTAGAACCGATACCACCTGGAGAAGGA-----GCCCAAGAGGGAGAGCCTCCACAGTTGAGGCCAGATACAAGTCT
21\_019 GA--TACTGAGGCGTGGCAATFCCAGTAACTTTAGAACCGATACCACCTGGAGAAGGA-----GCCCAAGAGGGAGAGCCTCCACAGTTGAGGCCAGATACAAGTCT
22\_012 GA--TACTGAGGCGTGGCAATFCCAGTAACTTTAGAACCGATACCACCTGGAGAAGGA-----GCCCAAGAGGGAGAGCCTCCACAGTTGAGGCCAGATACAAGTCT
22\_041 GA--TCTGAGGCGTGGCAATFCCAGTAACTTTAGAACCGATACCACCTGGAGAAGGA-----ACTCAACAGGAGCCTGTGTCACCAACTGAGGCTAGATATGATCT
2\_Tan GA--TACTGAGGCGTGGCAATFCCAGTAACTTTAGAACCGATACCACCTGGAGAAGGA-----GCCCAAGAGGGAGAGCCTCCACAGTTGAGGCCAGATACAAGTCT
3\_014 GA--TATGAGGCGTGGCACTTCCAGTAACTTTAGAACCGATACCACCTGGAGAAGGA-----GCCCAAGAGGGAGAGCCTCCACAGTTGAGGCCAGATACAAGTCT
3\_209 GA--TCTGAGGCGTGGCAATFCCAGTAACTTTAGAACCGATACCACCTGGAGAAGGA-----AGTCAACAGGAGCCTGTGTCACCAACTGAGGCTAGATATGATCT
3\_294 GA--TCTGAGGCGTGGCAATFCCAGTAACTTTAGAACCGATACCACCTGGAGAAGGA-----ACTCAACAGGAGCCTGTGTCACCAACTGAGGCTAGATATGATCT
3\_354 GA--TACTGAGGCGTGGCAATFCCAGTAACTTTAGAACCGATACCACCTGGAGAAGGA-----GCCCAAGAGGGAGAGCCTCCACAGTTGAGGCCAGATACAAGTCT
3\_385 GA--TACTGAGGCGTGGCAATFCCAGTAACTTTAGAACCGATACCACCTGGAGAAGGA-----GCCCAAGAGGGAGAGCCTCCACAGTTGAGGCCAGATACAAGTCT
3\_496 GA--TACTGAGGCGTGGCAATFCCAGTAACTTTAGAACCGATACCACCTGGAGAAGGA-----GCCCAAGAGGGAGAGCCTCCACAGTTGAGGCCAGATACAAGTCT
3\_610 GA--TACTGAGGCGTGGCAATFCCAGTAACTTTAGAACCGATACCACCTGGAGAAGGA-----GCCCAAGAGGGAGAGCCTCCACAGTTGAGGCCAGATACAAGTCT
4\_008 GA--TCTGAGGCGTGGCAATFCCAGTAACTTTAGAACCGATACCACCTGGAGAAGGA-------ACAAGTAGGAGTGCCTACCAACTGAGGCTAGATATGATCT
4\_032 GA--TCTGAGGCGTGGCAATFCCAGTAACTTTAGAACCGATACCACCTGGAGAAGGA-----AGTCAACAGGAGCCTGTGTCACCAACTGAGGCTAGATATGATCT
4\_052 GA--TCTGAGGCGTGGCAATFCCAGTAACTTTAGAACCGATACCACCTGGAGAAGGA-----AGTCAACAGGAGCCTGTGTCACCAACTGAGGCTAGATATGATCT
4\_068 GA--TCTGAGGCGTGGCAATFCCAGTAACTTTAGAACCGATACCACCTGGAGAAGGA-----AGTCAACAGGAGCCTGTGTCACCAACTGAGGCTAGATATGATCT
4\_716 GA--TACTGAGGCGTGGCAATFCCAGTAACTTTAGAACCGATACCACCTGGAGAAGGA-----GCCCAAGAGGGAGAGCCTCCACAGTTGAGGCCAGATACAAGTCT
4\_742 GA--TACTGAGGCGTGGCAATFCCAGTAACTTTAGAACCGATACCACCTGGAGAAGGA-----GCCCAAGAGGGAGAGCCTCCACAGTTGAGGCCAGATACAAGTCT
5\_147 GA--TACTGAGGCGTGGCAATFCCAGTAACTTTAGAACCGATACCACCTGGAGAAGGA-----GCCCAAGAGGGAGAGCCTCCACAGTTGAGGCCAGATACAAGTCT
5\_259 GA--TACTGAGGCGTGGCAATFCCAGTAACTTTAGAACCGATACCACCTGGAGAAGGA-----GCCCAAGAGGGAGAGCCTCCACAGTTGAGGCCAGATACAAGTCT
5\_535 GA--TCTGAGGCGTGGCACTTCCGTAATTTTACAACCGATACCAGCTGGAAAACGG-----AGTCAACAGGAGCCTGTGTCACCAACTGAGGCTAGATATGATCT
5\_544 GA--TACTGAGGCGTGGCAATFCCAGTAACTTTAGAACCGATACCACCTGGAGAAGGA-----GCCCAAGAGGGAGAGCCTCCACAGTTGAGGCCAGATACAAGTCT
6\_098 GA--TACTGAGGCGTGGCAATFCCAGTAACTTTAGAACCGATACCACCTGGAGAAGGA-----GCCCAAGAGGGAGAGCCTCCCTAGCTGAGGCCAGATACAAGTCT
6\_178 GA--TCTGAGGCGTGGCACTTCCGTAATTTTACAACCGATACCAGCTGGAAAACGG-----ACTCAACAGGAGCCTGTGTCACCAACTGAGGCTAGATATGATCT
6\_240 GC---TAAACACAGATGGCCACC--TCTCTCAGCCGAGTGAGTGTGGGAGGCG-----AGCCTGAACACTAGGCTCACTGTGACTCA-TTGTGCGACCCATTA
6\_324 GA--TACTGAGGCGTGGCAATFCCAGTAACTTTAGAACCGATACCACCTGGAGAAGGA-----GCCCAAGAGGGAGAGCCTCCACAGTTGAGGCCAGATACAAGTCT
7\_345 GA--TACTGAGGCGTGGCAATFCCAGTAACTTTAGAACCGATACCACCTGGAGAAGGA-----GCCCAAGAGGGAGAGCCTCCACAGTTGAGGCCAGATACAAGTCT
7\_450 GA--TACTGAGGCGTGGCAATFCCAGTAACTTTAGAACCGATACCACCTGGAGAAGGA-----GCCCAAGAGGGAGAGCCTCCCTAGCTGAGGCCAGATACAAGTCT
8\_047 GA--TCTGAGGCGTGGCAATFCCAGTAACTTTAGAACCGATACCACCTGGAGAAGGA-----AGTCAACAGCA-----
8\_074 GA--TCTGAGGCGTGGCAATFCCAGTAACTTTAGAACCGATACCAGCTGGAAAACGG-----AGTCAACAGCA-----
8\_094 GA--TCTGAGGCGTGGCAATFCCAGTAACTTTAGAACCGATACCAGCTGGAAAACGG-----AGTCAACAGCA-----
8\_121 -----
8\_235 GC---TAAACACAGATGGCCACC--TCTCTCAGCCGAGTGAGTGTGGGAGGCG-----AACCCTGAACACTAGGCTCACTGTGACTTTGTTACAGCACCATTAT
8\_525 GA--TACTGAGGCGTGGCAATFCCAGTAACTTTAGAACCGATACCACCTGGAGAAGGA-----GCCCAAGAGGGAGAGCCTCCACAGTTGAGGCCAGATACAAGTCT
8\_559 GA--TCTGAGGCGTGGCACTTCCGTAATTTTACAACCGATACCAGCTGGAAAACGG-----GCCCAAGAGGGAGAGCCTCCACAGTTGAGGCCAGATACAAGTCT
9\_307 GC---TAAACACAGATGGCCACC--TCTCTCAGCCGAGTGAGTGTGGGAGGCG-----AGCCTGAACACTAGGCTCACTGTGACTTTGTTACAGCACCATTAT
9\_340 GA--TACTGAGGCGTGGCACTTCCGTAATTTTAGAACCGATACCACCTGGAGAAGGA-----GCCCAAGAGGGAGAGCCTCCCTAGCTGAGGCCAGATACAAGTCT
HML2\_Rep GA--TACTGAGGCGTGGCAATFCCAGTAACTTTAGAACCGATACCACCTGGAGAAGGA-----GCCCAAGAGGGAGAGCCTCCACAGTTGAGGCCAGATACAAGTCT
K113 GA--TACTGAGGCGTGGCAATFCCAGTAACTTTAGAACCGATACCACCTGGAGAAGGA-----GCCCAAGAGGGAGAGCCTCCACAGTTGAGGCCAGATACAAGTCT
K115 GA--TACTGAGGCGTGGCAATFCCAGTAACTTTAGAACCGATACCACCTGGAGAAGGA-----GCCCAAGAGGGAGAGCCTCCACAGTTGAGGCCAGATACAAGTCT
X\_540 GC---TAAACACAGATGGCCACC--TCTCTCAGCCGAGTGAGTGTGGGAGGCG-----AGCCTGAACACTAGGCTCACTGTGACTTTGTTACAGCACCATTAT
Y\_026 GA--TCTGAGGCGTGGCACTTCCGTAATTTTACAACCGATACCAGCTGGAAAACGG-----AGTCAACAGGAGCCTGTGTCACCAACTGAGGCTAGATATGATCT
B270 GA--TACTGAGGCGTGGCAATFCCAGTAACTTTAGAACCGATACCACCTGGAGAAGGA-----GCCCAAGAGGGAGAGCCTCCACAGTTGAGGCCAGATACAAGTCT



|          | 5                                                                                                                     | 5 | 5 | 5 | 6 | 6 | 6 | 6 | 6 | 6 | 6 | 6 | 6 | 6 | 6 | 6 | 6 | 6 | 6 | 6 | 6 | 6 | 6 | 6 | 6 | 6 | 6 | 6 |   |
|----------|-----------------------------------------------------------------------------------------------------------------------|---|---|---|---|---|---|---|---|---|---|---|---|---|---|---|---|---|---|---|---|---|---|---|---|---|---|---|---|
|          | 8                                                                                                                     | 8 | 9 | 9 | 0 | 0 | 1 | 1 | 2 | 2 | 3 | 3 | 4 | 4 | 5 | 5 | 6 | 6 | 6 | 6 | 7 | 7 | 8 | 8 | 9 | 9 | 9 | 9 | 9 |
|          | 0                                                                                                                     | 5 | 0 | 5 | 0 | 5 | 0 | 5 | 0 | 5 | 0 | 5 | 0 | 5 | 0 | 5 | 0 | 5 | 0 | 5 | 0 | 5 | 0 | 5 | 0 | 5 | 0 | 5 | 0 |
| 10_019   | TTTTTCGATAAAAATGCT-AAAAGATATGAAAGAGGGGACTAA--AACACTATGGACCCCAACTCCCCTTATATGAGGACATTATTAGATCCATTGCTCATGGACATCATAGACTCA |   |   |   |   |   |   |   |   |   |   |   |   |   |   |   |   |   |   |   |   |   |   |   |   |   |   |   |   |
| 10_310   | TTTTTCGATAAAAATGCT-AAAAGATATGAAAGAGGGGACTAA--AACAGTATGGACCCCAACTCCCCTTATATGAGGACATTATTAGATCCATTGCTCATGGACAT---AGACTCA |   |   |   |   |   |   |   |   |   |   |   |   |   |   |   |   |   |   |   |   |   |   |   |   |   |   |   |   |
| 11_233   | TTGCCAACCTGCAGTT----CACTATGGTGAAGGAGCAA--TTCAGACTCACCTGCAGTATCCCGTCGGGTCACACAGTGG---CGCTCCCTAAGGAATAGTTGGGGGGCG       |   |   |   |   |   |   |   |   |   |   |   |   |   |   |   |   |   |   |   |   |   |   |   |   |   |   |   |   |
| 11_277   | TTTTCTATAAAAATGCT-AAAAGATATGAAAGAGGGGACTAA--AACAGTATGGACCCCAACTCCCCTTATATGAGAACATTATTAGATCCACGCTCATGGACAT---AGACTCA   |   |   |   |   |   |   |   |   |   |   |   |   |   |   |   |   |   |   |   |   |   |   |   |   |   |   |   |   |
| 11_424   | TTTTTCGATAAAAATGCT-AAAAGATATGAAAGAGGGGACTAA--AACAGTATGGACCCCAACTCCCCTTATATGAGGACATTATTAGATCCATTGCTCATGGACAT---AGACTCA |   |   |   |   |   |   |   |   |   |   |   |   |   |   |   |   |   |   |   |   |   |   |   |   |   |   |   |   |
| 11_456   | TTTTTGATAAAAATGCT-AAAAGATATGAAAGAGGGGACTAA--AACAGTATGGACCCCAACTCCCCTTATATGAGTACATTATTAGATCCATTGCTCATGGACAT---AGACTCA  |   |   |   |   |   |   |   |   |   |   |   |   |   |   |   |   |   |   |   |   |   |   |   |   |   |   |   |   |
| 12_216   | TTTTTCATAAAAATGCT-AAAAGATATGAAAGAGGGGACTAA--AACAGTATGGACCCCAACTCCCCTTATATGAGAACATTATTAGATCCATTGCTCATGGACAT---AGACTCA  |   |   |   |   |   |   |   |   |   |   |   |   |   |   |   |   |   |   |   |   |   |   |   |   |   |   |   |   |
| 12_419   | TTGCCAACCTGCAGTT----CACTACGGTGAAGGAGCAA--TTCAGACTTCCCTGCAGTCTCTGTATGGCTCAAGAGTGG---CGGCCTCTAAGGAAGTGGGGGTG            |   |   |   |   |   |   |   |   |   |   |   |   |   |   |   |   |   |   |   |   |   |   |   |   |   |   |   |   |
| 14_023   | TTCCACATGAAAATGTT-AAAAGATATGAAGGAGGCACTTA--AACATATGGACCCCAACTCCCCTTATATGAGAACATTATTAGATCCATTGCTCATGGAAAT---AGACTTA    |   |   |   |   |   |   |   |   |   |   |   |   |   |   |   |   |   |   |   |   |   |   |   |   |   |   |   |   |
| 16_010   | TTCCACATGAAAATGTT-AAAAGACATGAAGGAGGACTTA--AACATATGGACCCCAACTCCCCTTATATGAGAACATTATTAGATCCATTGCTCATGGAGG-----           |   |   |   |   |   |   |   |   |   |   |   |   |   |   |   |   |   |   |   |   |   |   |   |   |   |   |   |   |
| 17_029   | -----GTCAGTATGGTCCCAATTCGCCTTTCATCCATCGCTATTGCAATCTGTGGCTCAGAAATAAG---CTATTGA                                         |   |   |   |   |   |   |   |   |   |   |   |   |   |   |   |   |   |   |   |   |   |   |   |   |   |   |   |   |
| 19_157   | TTTTCTATAAAAATGCT-AAAAGATGCTGAAAGAGGGGACTAA--AA-AGTATGGACTCAACTCCCCTTATTGAGGACATTATTAAATCCATTGCTCATGGACAT---AGACTCA   |   |   |   |   |   |   |   |   |   |   |   |   |   |   |   |   |   |   |   |   |   |   |   |   |   |   |   |   |
| 19_238   | TTTTTCGATAAAAATGCT-AAAAGACATGAAAGAGGGGACTAA--AACAGTATGGACCCCAACTCCCCTTATATGAGGACATTATTAGATCCATTGCTCATGGACAT---AGACTCA |   |   |   |   |   |   |   |   |   |   |   |   |   |   |   |   |   |   |   |   |   |   |   |   |   |   |   |   |
| 19_352   | TTTTTCGATAAAAATGCT-AAAAGATATGAAAGAGGGGACTAA--AACAGTATGGACCCCAACTCCCCTTATATGAGGACATTATTAGATCCATTGCTCATGGACAT---AGACTCA |   |   |   |   |   |   |   |   |   |   |   |   |   |   |   |   |   |   |   |   |   |   |   |   |   |   |   |   |
| 19_407   | TTTTTCATAAAAATGCT-AAAAGATATGAAAGAGGGGACTAA--AACAGTATGGACCCCAACTCCCCTTATATGAGGACATTATTAGATCCATTGCTCATGGACAT---AGACTCA  |   |   |   |   |   |   |   |   |   |   |   |   |   |   |   |   |   |   |   |   |   |   |   |   |   |   |   |   |
| 19_639   | TTGCCACATTCAGTT----CATTATGGTGAAGGAGCAA--TTCAGACTTCCCTGCAGTATCCTGCTGAGTCAACAGTGG---CGCTCCCTAAGGAAGTGGGGGGCG            |   |   |   |   |   |   |   |   |   |   |   |   |   |   |   |   |   |   |   |   |   |   |   |   |   |   |   |   |
| 1_059    | TTCCACATGAAAATGTT-AAAAGATATGAAGGAGGACTTA--AACATATGGACCCCAACTCCCCTTATATGAGAACATTATTAGATCCATTGCTCATGGAAAT---AGACTTA     |   |   |   |   |   |   |   |   |   |   |   |   |   |   |   |   |   |   |   |   |   |   |   |   |   |   |   |   |
| 1_061    | TTCCACATGAAAATGTT-AAAAGATATGAAGGAGGACTTA--AACATATGGACCCCAACTCCCCTTATATGAGAACATTATTAGATCCATTGCTCATGGAAAT---AGACTTA     |   |   |   |   |   |   |   |   |   |   |   |   |   |   |   |   |   |   |   |   |   |   |   |   |   |   |   |   |
| 1_259    | TTTTTCGATAAAAATGCT-AAAAGATATGAAAGAGGGGACTAA--AACAGTATGGACCCCAACTCCCCTTATATGAGGACATTATTAGATCCATTGCTCATGGACAT---AGACTCA |   |   |   |   |   |   |   |   |   |   |   |   |   |   |   |   |   |   |   |   |   |   |   |   |   |   |   |   |
| 1_504    | TTTTTCGATAAAAATGCT-AAAAGATATGAAAGAGGGGACTAA--AACAGTATGGACCCCAACTCCCCTTATATGAGGACATTATTAGATCCATTGCTCATGGACAT---AGACTCA |   |   |   |   |   |   |   |   |   |   |   |   |   |   |   |   |   |   |   |   |   |   |   |   |   |   |   |   |
| 1_555    | TTTTAGATAAAAATGCT-AAAAGATATGAAAGAGGGGACTAA--AACAGTATGGACCCCAACTCCCCTTATATGAGGACATTATTAGATCCATTGCTCATGGACAT---AGACTCA  |   |   |   |   |   |   |   |   |   |   |   |   |   |   |   |   |   |   |   |   |   |   |   |   |   |   |   |   |
| 20_078   | TTTTCTATAAAAATGCT-AAAAGACATGAAAGAGGGGACTAA--AACAGTATGGACCCCAACTCCCCTTATATGAGAACATTATTAGATCCATTGCTCATGGACAT---AGACTTA  |   |   |   |   |   |   |   |   |   |   |   |   |   |   |   |   |   |   |   |   |   |   |   |   |   |   |   |   |
| 21_019   | TTTTTCGATAAAAATGCT-AAAAGATATGAAAGAGGGGACTAA--AACAGTATGGACCCCAACTCCCCTTATATGAGGACATTATTAGATCCATTGCTCATGGACAT---AGACTCA |   |   |   |   |   |   |   |   |   |   |   |   |   |   |   |   |   |   |   |   |   |   |   |   |   |   |   |   |
| 22_012   | TTTTTCGATAAAAATGCT-AAAAGATATGAAAGAGGGGACTAA--AACAGTATGGACCCCAACTCCCCTTATATGAGGACATTATTAGATCCATTGCTCATGGACAT---AGACTCA |   |   |   |   |   |   |   |   |   |   |   |   |   |   |   |   |   |   |   |   |   |   |   |   |   |   |   |   |
| 22_041   | TTCCACATGAAAATGTT-AAAAGATATAAGGAGGACTTA--AACATATGGATCCAACCTCCCCTTATATAAGAACATTATTAGATCCATTGCTCATGGAAAT---AGACTTA      |   |   |   |   |   |   |   |   |   |   |   |   |   |   |   |   |   |   |   |   |   |   |   |   |   |   |   |   |
| 2_Tan    | TTTTTCGATAAAAATGCT-AAAAGATATGAAAGAGGGGACTAA--AACAGTATGGACCCCAACTCCCCTTATATGAGGACATTATTAGATCCATTGCTCATGGACAT---AGACTCA |   |   |   |   |   |   |   |   |   |   |   |   |   |   |   |   |   |   |   |   |   |   |   |   |   |   |   |   |
| 3_014    | TTTTCTATAAAAATGCT-AAAAGACATGAAAGAGGGGACTAA--AACAGTATGGACCCCAACTCCCCTTATATGAGGACATTATTAGATCCATTGCTCATGGACAT---AGACTCA  |   |   |   |   |   |   |   |   |   |   |   |   |   |   |   |   |   |   |   |   |   |   |   |   |   |   |   |   |
| 3_209    | TTCCACATGAAAATGTT-AAAAGATATAAGGAGGACTTA--AACATATGGATCCAACCTCCCCTTATATAAGAACATTATTAGATCCATTGCTCATGGAAAT---AGACTTA      |   |   |   |   |   |   |   |   |   |   |   |   |   |   |   |   |   |   |   |   |   |   |   |   |   |   |   |   |
| 3_294    | TTCCACATGAAAATGTT-AAAAGATATAAGGAGGACTTA--AACATATGGATCCAACCTCCCCTTATATAAGAACATTATTAGATCCATTGCTCATGGAAAT---AGACTTA      |   |   |   |   |   |   |   |   |   |   |   |   |   |   |   |   |   |   |   |   |   |   |   |   |   |   |   |   |
| 3_354    | TTTTTCGATAAAAATGCT-AAAAGATATGAAAGAGGGGACTAA--AACAGTATGGACCCCAACTCCCCTTATATGAGGACATTATTAGATCCATTGCTCATGGACAT---AAACTCA |   |   |   |   |   |   |   |   |   |   |   |   |   |   |   |   |   |   |   |   |   |   |   |   |   |   |   |   |
| 3_385    | TTTTTCGATAAAAATGCT-AAAAGATATGAAAGAGGGGACTAA--AACAGTATGGACCCCAACTCCCCTTATATGAGGACATTATTAGATCCATTGCTCATGGACAT---AGACTCA |   |   |   |   |   |   |   |   |   |   |   |   |   |   |   |   |   |   |   |   |   |   |   |   |   |   |   |   |
| 3_496    | TTTTTCGATAAAAATGCT-AAAAGATATGAAAGAGGGGACTAA--AACAGTATGGACCCCAACTCCCCTTATATGAGGACATTATTAGATCCATTGCTCATGGACAT---AGACTCA |   |   |   |   |   |   |   |   |   |   |   |   |   |   |   |   |   |   |   |   |   |   |   |   |   |   |   |   |
| 3_610    | TTTTTCGATAAAAATGCT-AAAAGATATGAAAGAGGGGACTAA--AACAGTATGGACCCCAACTCCCCTTATATGAGGACATTATTAGATCCATTGCTCATGGACAT---AGACTCA |   |   |   |   |   |   |   |   |   |   |   |   |   |   |   |   |   |   |   |   |   |   |   |   |   |   |   |   |
| 4_008    | TTCCACCTGAAAATGTT-AAAAGATATAAGGAGGACTTA--AACATATGGATCCAACCTCCCCTTATATAAGAACATTATTAGATCCATTGCTCATGGAAAT---AGACTTA      |   |   |   |   |   |   |   |   |   |   |   |   |   |   |   |   |   |   |   |   |   |   |   |   |   |   |   |   |
| 4_032    | TTCCACCAAAAATGTT-AAAAGATATAAGGAGGACTTA--AACATATGGATCCAACCTCCCCTTATATAAGAACATTATTAGATCCATTGCTCATGGAAAT---AGACTTA       |   |   |   |   |   |   |   |   |   |   |   |   |   |   |   |   |   |   |   |   |   |   |   |   |   |   |   |   |
| 4_052    | ATCACCATAAAAATTTAAAAGATATGAAGGAGGACTTA--AACATATGGACTTAACCTCCCCTTATATGAGAACATTATTAGATCCATTGCTCATGGAAAT---AGACTTA       |   |   |   |   |   |   |   |   |   |   |   |   |   |   |   |   |   |   |   |   |   |   |   |   |   |   |   |   |
| 4_068    | TTCCACCAAAAATGTT-AAAAGATATAAGGAGGACTTA--AACATATGGACTTAACCTCCCCTTATATGAGAACATTATTAGATCCATTGCTCATGGAAAT---AGACTTA       |   |   |   |   |   |   |   |   |   |   |   |   |   |   |   |   |   |   |   |   |   |   |   |   |   |   |   |   |
| 4_716    | TTTTTCGATAAAAATGCT-AAAAGATATGAAAGAGGGGACTAA--AACAGTATGGACCCCAACTCCCCTTATATGAGGACATTATTAGATCCATTGCTCATGGACAT---AGACTCA |   |   |   |   |   |   |   |   |   |   |   |   |   |   |   |   |   |   |   |   |   |   |   |   |   |   |   |   |
| 4_742    | TTTTCTATAAAAATGCT-AAAAGATGAGGAGGAGGACTA--AACAGTATGGACCCCAACTCCCCTTATATGAGGACATTATTAGATCCATTGCTCATGGACAT---AGACTCA     |   |   |   |   |   |   |   |   |   |   |   |   |   |   |   |   |   |   |   |   |   |   |   |   |   |   |   |   |
| 5_147    | TTTTTCGATAAAAATGCT-AAAAGATATGAAAGAGGGGACTAA--AACAGTATGGACCCCAACTCCCCTTATATGAGGACATTATTAGATCCATTGCTCATGGACAT---AGACTCA |   |   |   |   |   |   |   |   |   |   |   |   |   |   |   |   |   |   |   |   |   |   |   |   |   |   |   |   |
| 5_259    | TTTTCTATAAAAATGCT-AAAAGATATGAAAGAGGGGACTAA--AACAGTATGGACCCCAACTCCCCTTATATGAGGACATTATTAGATCCATTGCTCATGGACAT---AGACTCA  |   |   |   |   |   |   |   |   |   |   |   |   |   |   |   |   |   |   |   |   |   |   |   |   |   |   |   |   |
| 5_535    | TTCCACCTGAAAATGTT-AAAAGATATGAAGGAGGACTTA--AACATATGGACCCCAACTCCCCTTATATGAGAACATTATTAGATCCATTGCTCATGGAAAT---AGACTTA     |   |   |   |   |   |   |   |   |   |   |   |   |   |   |   |   |   |   |   |   |   |   |   |   |   |   |   |   |
| 5_544    | TTTTTCGATAAAAATGCT-AAAAGATATGAAAGAGGGGACTAA--AACAGTATGGACCCCAACTCCCCTTATATGAGGACATTATTAGATCCATTGCTCATGGACAT---AGACTCA |   |   |   |   |   |   |   |   |   |   |   |   |   |   |   |   |   |   |   |   |   |   |   |   |   |   |   |   |
| 6_098    | TTTTCTATAAAAATGCT-AAAAGATATGAAAGAGGGGACTAA--AACAGTATGGACCCCAACTCCCCTTATATGAGAACATTATTAGATCCATTGCTCATGGACAG---AGACTCA  |   |   |   |   |   |   |   |   |   |   |   |   |   |   |   |   |   |   |   |   |   |   |   |   |   |   |   |   |
| 6_178    | TTCCACATGAAAATGTT-AAAAGATATGAAGGAGGACTTA--AAATATGGACCCCAACTCCCCTTATATGAGAACATTATTAGATCCATTGCTCATGGAAAT---AGACTTA      |   |   |   |   |   |   |   |   |   |   |   |   |   |   |   |   |   |   |   |   |   |   |   |   |   |   |   |   |
| 6_240    | TTGCCAACCTACAGTT----CACTACAATGAAGGAGCAA--TTCAGACTCACCTGCAGTGTCTGTATGGCTCAACAGTGG---CGGCCTCTAAGGAAGTGGGGGTG            |   |   |   |   |   |   |   |   |   |   |   |   |   |   |   |   |   |   |   |   |   |   |   |   |   |   |   |   |
| 6_324    | TTTTTCGATAAAAATGCT-AAAAGATATGAAAGAGGGGACTAA--AACAGTATGGACCCCAACTCCCCTTATATGAGGACATTATTAGATCCATTGCTCATGGACAT---AGACTCA |   |   |   |   |   |   |   |   |   |   |   |   |   |   |   |   |   |   |   |   |   |   |   |   |   |   |   |   |
| 7_345    | TTTTTCGATAAAAATGCT-AAAAGATATGAAAGAGGAGACTAA--AACAGTATGGACCCCAACTCCCCTTATATGAGGACATTATTAGATCCATTGCTCATGGACAT---AGACTCA |   |   |   |   |   |   |   |   |   |   |   |   |   |   |   |   |   |   |   |   |   |   |   |   |   |   |   |   |
| 7_450    | TTTTCTATAAAAATGCT-AAAAGATATGAAAGAGGGGACTAA--AACAGTATGGACCCCAACTCCCCTTATATGAGGACATTATTAGATCCATTGCTCATGGACAT---AGACTCA  |   |   |   |   |   |   |   |   |   |   |   |   |   |   |   |   |   |   |   |   |   |   |   |   |   |   |   |   |
| 8_047    | -----GGACTTA--AACATATGGACTTAACCTCCCCTTATATGAGAACATTATTAAATCCATTGCTCATGGAAAT---AGACTTA                                 |   |   |   |   |   |   |   |   |   |   |   |   |   |   |   |   |   |   |   |   |   |   |   |   |   |   |   |   |
| 8_074    | -----GGACTTA--AACATATGGACTTAACCTCCCCTTATATGAGAACATTATTAAATCCATTGCTCATGGAAAT---AGACTTA                                 |   |   |   |   |   |   |   |   |   |   |   |   |   |   |   |   |   |   |   |   |   |   |   |   |   |   |   |   |
| 8_094    | -----GGACTTA--AACATATGGACTTAACCTCCCCTTATATGAGAACATTATTAAATCCATTGCTCATGGAAAT---AGACTTA                                 |   |   |   |   |   |   |   |   |   |   |   |   |   |   |   |   |   |   |   |   |   |   |   |   |   |   |   |   |
| 8_121    | -----GTCAGTATGGTCCCAATTCGCCTTTCATCCATCGCTATTGCAATCTGTGGCTCAGTAAACAGGACAAG---CGATTGG                                   |   |   |   |   |   |   |   |   |   |   |   |   |   |   |   |   |   |   |   |   |   |   |   |   |   |   |   |   |
| 8_235    | TTGCCAACCTGCAGTT----CACTATGGTGAAGGAGCAA--TTCAGACTCACCTGCAGTGTCTGTATGGCTCAACAGTGA---CCACTCCCTAAGGAAGTGGGGGGCG          |   |   |   |   |   |   |   |   |   |   |   |   |   |   |   |   |   |   |   |   |   |   |   |   |   |   |   |   |
| 8_525    | TTTTTCGATAAAAATGCT-AAAAGATATGAAAGAGGGGACTAA--AACAGTATGGACCCCAACTCCCCTTATATGAGGACATTATTAGATCCATTGCTCATGGACAT---AGACTCA |   |   |   |   |   |   |   |   |   |   |   |   |   |   |   |   |   |   |   |   |   |   |   |   |   |   |   |   |
| 8_559    | TTCCACATGAAAATGTT-AAAAGACATAAGGAGGACTTA--AACATATGGACCCCAACTCCCCTTATATGAGAACATTATTAGATCCATTGCTCATGGAAAT---AGACTTA      |   |   |   |   |   |   |   |   |   |   |   |   |   |   |   |   |   |   |   |   |   |   |   |   |   |   |   |   |
| 9_307    | TTGCCAACCTACAGTT----CACTACAGTGAAGGAGCAA--TTCAGACTCACCTGCAGTGTCTGTATGGCTCAACAGTGG---CCACTCTCTAAGGAAGTGGGGGGCG          |   |   |   |   |   |   |   |   |   |   |   |   |   |   |   |   |   |   |   |   |   |   |   |   |   |   |   |   |
| 9_340    | TTTTCTATGAAAATGCT-AAAAGACATGAAAGAGGGGACTAA--AACAGTATGGACCCCAACTCCCCTTATATGAGGACATTATTAGATCCATTGCTCATGGACAT---AGACTCA  |   |   |   |   |   |   |   |   |   |   |   |   |   |   |   |   |   |   |   |   |   |   |   |   |   |   |   |   |
| HML2_Rep | TTTTTCGATAAAAATGCT-AAAAGATATGAAAGAGGGGACTAA--AACAGTATGGACCCCAACTCCCCTTATATGAGGACATTATTAGATCCATTGCTCATGGACAT---AGACTCA |   |   |   |   |   |   |   |   |   |   |   |   |   |   |   |   |   |   |   |   |   |   |   |   |   |   |   |   |
| K113     | TTTTTCGATAAAAATGCT-AAAAGATATGAAAGAGGGGACTAA--AACAGTATGGACCCCAACTCCCCTTATATGAGGACATTATTAGATCCATTGCTCATGGACAT---AGACTCA |   |   |   |   |   |   |   |   |   |   |   |   |   |   |   |   |   |   |   |   |   |   |   |   |   |   |   |   |
| K115     | TTTTTCGATAAAAATGCT-AAAAGATATGAAAGAGGGGACTAA--AACAGTATGGACCCCAACTCCCCTTATATGAGGACATTATTAGATCCATTGCTCATGGACAT---AGACTCA |   |   |   |   |   |   |   |   |   |   |   |   |   |   |   |   |   |   |   |   |   |   |   |   |   |   |   |   |
| X_540    | TTGCCAACCCGCGCAGTT----CACTGCGGTGAAGGAGCAA--TTCAGACTCACCTGTGATCTCTGTGGCTCAACAGTGG---CGGCCTCTAAGGAAGTGGGGGGCG           |   |   |   |   |   |   |   |   |   |   |   |   |   |   |   |   |   |   |   |   |   |   |   |   |   |   |   |   |
| Y_026    | TTCCACATGAAAATGTT-AAAAGATATGAAGGAGGACTTA--AACATATGGACCCCAACTCCCCTTATATGAGAACATTATTAGATCCATTGCTCATGGAAAT---AGACTTA     |   |   |   |   |   |   |   |   |   |   |   |   |   |   |   |   |   |   |   |   |   |   |   |   |   |   |   |   |
| B270     | TTTTCTATAAAAATGCT-AAAAGACATGAAAGAGGGGACTAA--AACAGTATGGACCCCAACTCCCCTTATATGAGGACATTATTAGATCCATTGCTCATGGACAT---AGACTCA  |   |   |   |   |   |   |   |   |   |   |   |   |   |   |   |   |   |   |   |   |   |   |   |   |   |   |   |   |

|          | 6                                                                                                                  | 7 | 7 | 7 | 7 | 7 | 7 | 7 | 7 | 7 | 7 | 7 | 7 | 7 | 7 | 7 | 7 | 7 | 7 | 7 | 7 | 7 | 7 | 7 | 8 | 8 |
|----------|--------------------------------------------------------------------------------------------------------------------|---|---|---|---|---|---|---|---|---|---|---|---|---|---|---|---|---|---|---|---|---|---|---|---|---|
|          | 9                                                                                                                  | 0 | 0 | 1 | 1 | 2 | 2 | 3 | 3 | 4 | 4 | 5 | 5 | 6 | 6 | 7 | 7 | 8 | 8 | 9 | 9 | 9 | 9 | 0 | 0 | 0 |
|          | 5                                                                                                                  | 0 | 5 | 0 | 5 | 0 | 5 | 0 | 5 | 0 | 5 | 0 | 5 | 0 | 5 | 0 | 5 | 0 | 5 | 0 | 5 | 0 | 5 | 0 | 5 | 0 |
| 10_019   | TTCC-TTA--TGATTGGGAGA-TTCTGGCAAAATCGTCTCT-CTCACCCCTC-TCAATTTTACAATTTAAGACTTGGTG-----GATTGATGGG-----GCACAAGAAC      |   |   |   |   |   |   |   |   |   |   |   |   |   |   |   |   |   |   |   |   |   |   |   |   |   |
| 10_310   | TTCC-TTA--TGATTGGGAGA-TTCTGGCAAAATCGTCTCT-CTCACCCCTC-TCAATTTTACAATTTAAGACTTGGTG-----GATTGATGGG-----GTACAAGAAC      |   |   |   |   |   |   |   |   |   |   |   |   |   |   |   |   |   |   |   |   |   |   |   |   |   |
| 11_233   | CTACATAAAGTAGTTAAAAA-CTATTGTA AAAAGCATGTTTCACCAATG-----GATTGATGGG-----GCACAAGAAC                                   |   |   |   |   |   |   |   |   |   |   |   |   |   |   |   |   |   |   |   |   |   |   |   |   |   |
| 11_277   | TTCC-TTA--TGATTGGGAGA-TTCTGGCAAAATCGTCTCT-CTCACCCCTC-TCAATTTTACAATTTAAGACTTGGTG-----GATTGATGGG-----GCACAAGAAC      |   |   |   |   |   |   |   |   |   |   |   |   |   |   |   |   |   |   |   |   |   |   |   |   |   |
| 11_424   | TTCC-TTA--TGATTGGGAGA-TTCTGGCAAAATCGTCTCT-CTCACCCCTC-TCAATTTTACAATTTAAGACTTGGTG-----GATTGATGGG-----GTACAAGAAC      |   |   |   |   |   |   |   |   |   |   |   |   |   |   |   |   |   |   |   |   |   |   |   |   |   |
| 11_456   | TTCC-TTA--TGATTGGGAGA-TTCTGGCAAAATCGTCTCT-CTCACCCCTC-TCAATTTTACAATTTAAGACTTGGTG-----GATTGATGGG-----GTACAAGAAC      |   |   |   |   |   |   |   |   |   |   |   |   |   |   |   |   |   |   |   |   |   |   |   |   |   |
| 12_216   | TTCC-TTA--TGATTGGGAGA-TTCTGGCAAAATCGTCTCT-CTCACCCCTC-TCAATTTTACAATTTAAGACTTGGTG-----GATTGATGGG-----GTACAAGAAC      |   |   |   |   |   |   |   |   |   |   |   |   |   |   |   |   |   |   |   |   |   |   |   |   |   |
| 12_419   | TTACATAAAGTAGTTAAAAA-CTATTGTA AAAAGCATGTTTCACCAACT-----GATTGATGGG-----GTACAAGAAC                                   |   |   |   |   |   |   |   |   |   |   |   |   |   |   |   |   |   |   |   |   |   |   |   |   |   |
| 14_023   | TTCC-TTA--TGATTGGGAAA-TTTPGGCTAAATCTTCTCT-TTCACCCTC-TCACTATCTACAATTTAAAACCTGGTG-----GATTGACGGA-----GTACAAGAAC      |   |   |   |   |   |   |   |   |   |   |   |   |   |   |   |   |   |   |   |   |   |   |   |   |   |
| 16_010   | -----GATTGATGGG-----GTACAAGAAC                                                                                     |   |   |   |   |   |   |   |   |   |   |   |   |   |   |   |   |   |   |   |   |   |   |   |   |   |
| 17_029   | CTCC-GTG--TGATTGGGAGA-TTTTAAAGAAAGTAACT-TTCGCCCTC-CCAATTTCTTCACTTTAAGACTTGGTG-----GACCGACGAG-----GCTCAA AATC       |   |   |   |   |   |   |   |   |   |   |   |   |   |   |   |   |   |   |   |   |   |   |   |   |   |
| 19_157   | TTCC-TTA--TGATTGGGAGA-TTTPGGCAAAATCATCACT-CTCACCCCTC-T-ATCTTTTACAATTTAAGACTTGGTG-----GATTGATGGG-----GTACAAGAAC     |   |   |   |   |   |   |   |   |   |   |   |   |   |   |   |   |   |   |   |   |   |   |   |   |   |
| 19_238   | TTCC-TTA--TGATTGGGAGA-TTTPGGCAAAATCGTCTCT-CTCACCCCTC-TCAATTTTACAATTTAAGACTTGGTG-----GATTGATGGG-----GCACAAGAAC      |   |   |   |   |   |   |   |   |   |   |   |   |   |   |   |   |   |   |   |   |   |   |   |   |   |
| 19_352   | TTCC-TTA--TGATTGGGAGA-TTCTGGCAAAATCGTCTCT-CTCACCCCTC-TCAATTTTACAATTTAAGACTTGGTG-----GATTGATGGG-----GTACAAGAAC      |   |   |   |   |   |   |   |   |   |   |   |   |   |   |   |   |   |   |   |   |   |   |   |   |   |
| 19_407   | TTCT-TTA--TGATTGGGAGA-TTTPGGCAAAATGATCGCT-CTCACCCCTC-TCAATGTTTACAATTTAAGACTTGGTGAAGACTTGGTGATGATGGG-----GCACAAGAAC |   |   |   |   |   |   |   |   |   |   |   |   |   |   |   |   |   |   |   |   |   |   |   |   |   |
| 19_639   | CTACATAAAGTAGTTAAAAA-CTACTTAAAAA-GGACACTTTCACCCACT-----GATTGATGGG-----GTACAAGAAC                                   |   |   |   |   |   |   |   |   |   |   |   |   |   |   |   |   |   |   |   |   |   |   |   |   |   |
| 1_059    | TTCC-CTA--TGATTGGGAAA-CGTGGCTAAATCTTCCCT-TTCACCCTC-TCACTTCTACAATTTAAAACCTGGTG-----GATTGATGGA-----GTACAAGAAC        |   |   |   |   |   |   |   |   |   |   |   |   |   |   |   |   |   |   |   |   |   |   |   |   |   |
| 1_061    | TTCC-CTA--TGATTGGGAAA-TGTGGCTAAATCTTCCCT-TTCACCCTC-TCACTTCTACAATTTAAAACCTGGTG-----GATTGATGGA-----GTACAAGAAC        |   |   |   |   |   |   |   |   |   |   |   |   |   |   |   |   |   |   |   |   |   |   |   |   |   |
| 1_259    | TTCC-TTA--TGATTGGGAGA-TTTPGGCAAAATCGTCTCT-CTCACCCCTC-TCAATTTTACAATTTAAGACTTGGTG-----GATTGATGGG-----GTACAAGAAC      |   |   |   |   |   |   |   |   |   |   |   |   |   |   |   |   |   |   |   |   |   |   |   |   |   |
| 1_504    | TTCC-TTA--TGATTGGGAGA-TTCTGGCAAAATCGTCTCT-CTCACCCCTC-TCAATTTTACAATTTAAGACTTGGTG-----GATTGATGGG-----GTACAAGAAC      |   |   |   |   |   |   |   |   |   |   |   |   |   |   |   |   |   |   |   |   |   |   |   |   |   |
| 1_555    | TTCC-TTA--TGATTGGGAGA-TTCTGGCAAAATCATCTCT-CTCACCCCTC-TCAATTTTACAATTTAAGACTTGGTG-----AATTGATGGG-----GCACAAGAAC      |   |   |   |   |   |   |   |   |   |   |   |   |   |   |   |   |   |   |   |   |   |   |   |   |   |
| 20_078   | TTCC-TTA--TGATTGGGAGA-TTTPGGCAAAATCGTCTCT-CTCACCCCTC-TCAATTTTACAATTTAAGACTTGGTG-----GATTGATGGG-----GTACAAGAAC      |   |   |   |   |   |   |   |   |   |   |   |   |   |   |   |   |   |   |   |   |   |   |   |   |   |
| 21_019   | TTCC-TTA--TGATTGGGAGA-TTCTGGCAAAATCGTCTCT-CTCACCCCTC-TCAATTTTACAATTTAAGACTTGGTG-----GATTGATGGG-----GTACAAGAAC      |   |   |   |   |   |   |   |   |   |   |   |   |   |   |   |   |   |   |   |   |   |   |   |   |   |
| 22_012   | TTCC-TTA--TGATTGGGAGA-TTCTGGCAAAATCGTCTCT-CTCACCCCTC-TCAATTTTACAATTTAAGACTTGGTG-----GATTGATGGG-----GTACAAGAAC      |   |   |   |   |   |   |   |   |   |   |   |   |   |   |   |   |   |   |   |   |   |   |   |   |   |
| 22_041   | CTCC-TTA--TGACTGGGAAA-TTTPGGCAAAATCTTCCCT-TTCACCCTC-TCACTATCTACAGTTTAAAACCTGGTG-----GATTGATGGA-----GTACAAGAAC      |   |   |   |   |   |   |   |   |   |   |   |   |   |   |   |   |   |   |   |   |   |   |   |   |   |
| 2_Tan    | TTCC-TTA--TGATTGGGAGA-TTCTGGCAAAATCGTCTCT-CTCACCCCTC-TCAATTTTACAATTTAAGACTTGGTG-----GATTGATGGG-----GTACAAGAAC      |   |   |   |   |   |   |   |   |   |   |   |   |   |   |   |   |   |   |   |   |   |   |   |   |   |
| 3_014    | TTCC-TTA--TGATTGGGAGA-TTCTGGCAAAATCGTCTCT-CTCACCCCTC-TCAATTTTACAATTTAAGACTTGGTG-----GATTGATGGG-----GCACAAGAAC      |   |   |   |   |   |   |   |   |   |   |   |   |   |   |   |   |   |   |   |   |   |   |   |   |   |
| 3_209    | TTCC-TTA--AGATTGGGAAA-TTTPGGCTAAATCTTCCCT-CTCACCCCTC-TCACTATCTACAGTTTAAAACCTGGTG-----GATTGATGGG-----GTACAAGAAC     |   |   |   |   |   |   |   |   |   |   |   |   |   |   |   |   |   |   |   |   |   |   |   |   |   |
| 3_294    | CTCC-TTA--TGACTGGGAAA-GTTPGGCAAAATCTTCCCT-TTCACCCTC-TCACTATCTACAGTTTAAAACCTGGTG-----GATTGATGGA-----GTACAAGAAC      |   |   |   |   |   |   |   |   |   |   |   |   |   |   |   |   |   |   |   |   |   |   |   |   |   |
| 3_354    | TTCC-TTA--TGATTGGGAGA-TTCTGGCAAAATCGTCTCT-CTCACCCCTC-TCAATTTTACAATTTAAGACTTGGTG-----GATTGATGGG-----GTACAAGAAC      |   |   |   |   |   |   |   |   |   |   |   |   |   |   |   |   |   |   |   |   |   |   |   |   |   |
| 3_385    | TTCC-TTA--TGATTGGGAGA-TTTPGGCAAAATCGTCTCT-CTCACCCCTC-TCAATTTTACAATTTAAGACTTGGTG-----GATTGATGGG-----GTACAAGAAC      |   |   |   |   |   |   |   |   |   |   |   |   |   |   |   |   |   |   |   |   |   |   |   |   |   |
| 3_496    | TTCC-TTA--TGATTGGGAGA-TTCTGGCAAAATCGTCTCT-CTCACCCCTC-TCAATTTTACAATTTAAGACTTGGTG-----GATTGATGGG-----GTACAAGAAC      |   |   |   |   |   |   |   |   |   |   |   |   |   |   |   |   |   |   |   |   |   |   |   |   |   |
| 3_610    | TTCC-TTA--TGATTGGGAGA-TTCTGGCAAAATCGTCTCT-CTCACCCCTC-TCAATTTTACAATTTAAGACTTGGTG-----GATTGATGGG-----GTACAAGAAC      |   |   |   |   |   |   |   |   |   |   |   |   |   |   |   |   |   |   |   |   |   |   |   |   |   |
| 4_008    | TTCC-TTA--TGATTGGGAGA-TTTPGGCAAAATCGTCTCT-CTCACCCCTC-TCACTATCTACAGTTTAAAACCTGGTG-----GATTGATGGG-----GTACAAGAAC     |   |   |   |   |   |   |   |   |   |   |   |   |   |   |   |   |   |   |   |   |   |   |   |   |   |
| 4_032    | TTCC-TTA--TAATTGGGAAA-TTTPGGCTAAATCTTCCCT-TTCACCCTC-TCACTATCTACAGTTTAAAACCTGGTG-----GATTGATGGG-----GTACAAGAAC      |   |   |   |   |   |   |   |   |   |   |   |   |   |   |   |   |   |   |   |   |   |   |   |   |   |
| 4_052    | TTCT-TTA--TGATTGGGAAA-TTTPGGCTAAATCTTCCCT-TTCACCCTC-TCACTATCTACAGTTTAAAACCTGGTG-----GAATGATGGG-----GTACAAGAAC      |   |   |   |   |   |   |   |   |   |   |   |   |   |   |   |   |   |   |   |   |   |   |   |   |   |
| 4_068    | TTCC-TTA--TAATTGGGAAA-TTTPGGCTAAATCTTCCCT-TTCACCCTC-TCACTATCTACAGTTTAAAACCTGGTG-----GATTGATGGG-----GTACAAGAAC      |   |   |   |   |   |   |   |   |   |   |   |   |   |   |   |   |   |   |   |   |   |   |   |   |   |
| 4_716    | TTCC-TTA--TGATTGGGAGA-TTCTGGCAAAATCGTCTCT-CTCACCCCTC-TCAATTTTACAATTTAAGACTTGGTG-----GATTGATGGG-----GTACAAGAAC      |   |   |   |   |   |   |   |   |   |   |   |   |   |   |   |   |   |   |   |   |   |   |   |   |   |
| 4_742    | TTCC-TTA--TGATTGGGAGA-TTCTGGCAAAATCGTCTT-TTCACCCTC-TCAATTTGTAATTTAAGACTTGGTG-----GATTGATAGG-----ACACAAGAAC         |   |   |   |   |   |   |   |   |   |   |   |   |   |   |   |   |   |   |   |   |   |   |   |   |   |
| 5_147    | TTCC-TTA--TGATTGGGAGA-TTCTGGCAAAATCGTCTCT-CTCACCCCTC-TCAATTTTACAATTTAAGACTTGGTG-----GATTGATGGG-----GTACAAGAAC      |   |   |   |   |   |   |   |   |   |   |   |   |   |   |   |   |   |   |   |   |   |   |   |   |   |
| 5_259    | TTCC-TTA--TGATTGGGAGA-TTTPGGCAAAATCGTCTCT-CTCACCCCTC-TCAATTTTACAATTTAAGACTTGGTG-----GATTGATGGG-----TAACAAGAAC      |   |   |   |   |   |   |   |   |   |   |   |   |   |   |   |   |   |   |   |   |   |   |   |   |   |
| 5_535    | TTCC-TTA--TGATTGGGAAA-TTTPGGCTAAGTCTTCCCT-TTCACCCTC-TCACTTCTACAGTTTAAAACCTGGTG-----GATTGATGGA-----GTACAAGAAC       |   |   |   |   |   |   |   |   |   |   |   |   |   |   |   |   |   |   |   |   |   |   |   |   |   |
| 5_544    | TTCC-TTA--TGATTGGGAGA-TTCTGGCAAAATCGTCTCT-CTCACCCCTC-TCAATTTTACAATTTAAGACTTGGTG-----GATTGATGGG-----GTACAAGAAC      |   |   |   |   |   |   |   |   |   |   |   |   |   |   |   |   |   |   |   |   |   |   |   |   |   |
| 6_098    | TTCC-TTA--TGATTGGGAGA-TTTPGGCAAAATCATCACT-CTCACCCCTC-TCAATTTTACAATTTAAGACTTGGTG-----AATTGATGGG-----GCACAAGAAC      |   |   |   |   |   |   |   |   |   |   |   |   |   |   |   |   |   |   |   |   |   |   |   |   |   |
| 6_178    | TTCC-TTA--TGACTGGGAAA-TTTPGGCTAAATCTTCCCT-TTCACCCTC-TCACTTCTACAGTTTAAAACCTGGTG-----GATCGATGGA-----GTACAAGAAC       |   |   |   |   |   |   |   |   |   |   |   |   |   |   |   |   |   |   |   |   |   |   |   |   |   |
| 6_240    | CTACATAAAGTAGTTAAAAA-CTATTTAAAAGGACATGTTTCACCACT-----GATTGATGGG-----GTACAAGAAC                                     |   |   |   |   |   |   |   |   |   |   |   |   |   |   |   |   |   |   |   |   |   |   |   |   |   |
| 6_324    | TTCC-TTA--TGATTGGGAGA-TTCTGGCAAAATCGTCTCT-CTCACCCCTC-TCAATTTTACAATTTAAGACTTGGTG-----GATTGATGGG-----GTACAAGAAC      |   |   |   |   |   |   |   |   |   |   |   |   |   |   |   |   |   |   |   |   |   |   |   |   |   |
| 7_345    | TTCC-TTA--TGATTGGGAGA-TTCTGGCAAAATCGTCTCT-CTCACCCCTC-TCAATTTTACAATTTAAGACTTGGTG-----GATTGATGGG-----GTTCAAGAAC      |   |   |   |   |   |   |   |   |   |   |   |   |   |   |   |   |   |   |   |   |   |   |   |   |   |
| 7_450    | TTCC-TTA--TGATTGGGAGA-TTTPGGCAAAATGTCCTCT-CTCACCCCTC-TCAATTTTACAATTTAAGACTTGGTG-----GATTGATGGG-----GCACAAGAAC      |   |   |   |   |   |   |   |   |   |   |   |   |   |   |   |   |   |   |   |   |   |   |   |   |   |
| 8_047    | TTTC-TTA--TGATTGGGAAA-TTCTGGCTAAATCTTCCCT-TTCACCCTC-TCACTATCTCCAGTTTAAAACCTGGTG-----GATTGATGGG-----GTACAAGAAC      |   |   |   |   |   |   |   |   |   |   |   |   |   |   |   |   |   |   |   |   |   |   |   |   |   |
| 8_074    | TTTC-TTA--TGATTGGGAAA-TTCTGGCTAATCTTCCCT-TTCACCCTC-TCACTATCTCCAGTTTAAAACCTGGTG-----GATTGATGGG-----GTACAAGAAC       |   |   |   |   |   |   |   |   |   |   |   |   |   |   |   |   |   |   |   |   |   |   |   |   |   |
| 8_094    | TTTC-TTA--TGATTGGGAAA-TTTPGGCTAATCTTCCCT-TTCACCCTC-TCACTATCTCCAGTTTAAAACCTGGTG-----GATTGATGGG-----GTACAAGAAC       |   |   |   |   |   |   |   |   |   |   |   |   |   |   |   |   |   |   |   |   |   |   |   |   |   |
| 8_121    | CCCC-GCA--CGATTGGGAGA-TTTPAGCAAAGCTACTCT-TTCGCCCTC-CCAATTTCTCAATTTAAAAGTGGTG-----GACCGATGAG-----GCTCAA AATC        |   |   |   |   |   |   |   |   |   |   |   |   |   |   |   |   |   |   |   |   |   |   |   |   |   |
| 8_235    | CTGCATAAAGTAGTTAAAAA-CTATTTAAAAGGACATGTTTCACCACT-----GATTGATGGG-----GTACAAGAAC                                     |   |   |   |   |   |   |   |   |   |   |   |   |   |   |   |   |   |   |   |   |   |   |   |   |   |
| 8_525    | TTCC-TTA--CAATTGGGAGA-TTCTGGCAAAATCGTCTCT-CTCACCCCTC-TCAATTTTACAATTTAAGACTTGGTG-----GATTGATGGG-----GTACAAGAAC      |   |   |   |   |   |   |   |   |   |   |   |   |   |   |   |   |   |   |   |   |   |   |   |   |   |
| 8_559    | TTCC-TTA--TGATTGGGAAA-TTTPACCTAAATCTTCCCT-TTCACCCTC-TCACTATCTACAGTTTAAAACCTGGTG-----GATTGATGGA-----GTACAAGAAC      |   |   |   |   |   |   |   |   |   |   |   |   |   |   |   |   |   |   |   |   |   |   |   |   |   |
| 9_307    | CTACATAAAGTAGTTAAAAA-CTATTTAAAAGGACATGTTTCACCACT-----GATTGATGGG-----ACACAAGAAC                                     |   |   |   |   |   |   |   |   |   |   |   |   |   |   |   |   |   |   |   |   |   |   |   |   |   |
| 9_340    | TTCC-TTA--TGATTGGGAGA-TTTPGGCAAAATCATCACT-CTCACCCCTC-TCAATTTTACAATTTAAGACTTGGTG-----GATTGATGGG-----ACACAAGAAC      |   |   |   |   |   |   |   |   |   |   |   |   |   |   |   |   |   |   |   |   |   |   |   |   |   |
| HML2_Rep | TTCC-TTA--TGATTGGGAGA-TTCTGGCAAAATCGTCTCT-CTCACCCCTC-TCAATTTTACAATTTAAGACTTGGTG-----GATTGATGGG-----GTACAAGAAC      |   |   |   |   |   |   |   |   |   |   |   |   |   |   |   |   |   |   |   |   |   |   |   |   |   |
| K113     | TTCC-TTA--TGATTGGGAGA-TTCTGGCAAAATCGTCTCT-CTCACCCCTC-TCAATTTTACAATTTAAGACTTGGTG-----GATTGATGGG-----GTACAAGAAC      |   |   |   |   |   |   |   |   |   |   |   |   |   |   |   |   |   |   |   |   |   |   |   |   |   |
| K115     | TTCC-TTA--TGATTGGGAGA-TTTPGGCAAAATCGTCTCT-CTCACCCCTC-TCAATTTTACAATTTAAGACTTGGTG-----GATTGATGGG-----GTACAAGAAC      |   |   |   |   |   |   |   |   |   |   |   |   |   |   |   |   |   |   |   |   |   |   |   |   |   |
| X_540    | CTACATAAAGTAGTTAAAAAAGCTATTTAAAAGGACATGTTTCACCACT-----GATTGATGGG-----GTACAAGAAC                                    |   |   |   |   |   |   |   |   |   |   |   |   |   |   |   |   |   |   |   |   |   |   |   |   |   |
| Y_026    | TTCC-TTA--TGATTGGGAAA-TTTPGGCTAAATCTTCCCT-TTCACCCTC-TCAATTTCTACAGTTTAAAACCTGGTA-----GATTGATGGA-----GTACAAGAAT      |   |   |   |   |   |   |   |   |   |   |   |   |   |   |   |   |   |   |   |   |   |   |   |   |   |
| B270     | TTCC-TTA--TGATTGGGAGA-TTCTGGCAAAATCGTCTCT-CTCACCCCTC-TCAATTTTACAATTTAAGACTTGGTG-----GATTGATGGG-----GCACAAGAAC      |   |   |   |   |   |   |   |   |   |   |   |   |   |   |   |   |   |   |   |   |   |   |   |   |   |

|          |   |
|----------|---|
| 10_019   | A |
| 10_310   | A |
| 11_233   | - |
| 11_277   | A |
| 11_424   | A |
| 11_456   | A |
| 12_216   | A |
| 12_419   | - |
| 14_023   | A |
| 16_010   | - |
| 17_029   | A |
| 19_157   | A |
| 19_238   | A |
| 19_352   | A |
| 19_407   | A |
| 19_639   | - |
| 1_059    | A |
| 1_061    | A |
| 1_259    | A |
| 1_504    | A |
| 1_555    | A |
| 20_078   | A |
| 21_019   | G |
| 22_012   | A |
| 22_041   | A |
| 2_Tan    | A |
| 3_014    | A |
| 3_209    | A |
| 3_294    | A |
| 3_354    | A |
| 3_385    | A |
| 3_496    | A |
| 3_610    | A |
| 4_008    | A |
| 4_032    | A |
| 4_052    | A |
| 4_068    | A |
| 4_716    | A |
| 4_742    | A |
| 5_147    | A |
| 5_259    | A |
| 5_535    | A |
| 5_544    | A |
| 6_098    | A |
| 6_178    | A |
| 6_240    | - |
| 6_324    | A |
| 7_345    | A |
| 7_450    | A |
| 8_047    | A |
| 8_074    | A |
| 8_094    | A |
| 8_121    | A |
| 8_235    | - |
| 8_525    | A |
| 8_559    | A |
| 9_307    | - |
| 9_340    | A |
| HML2_Rep | A |
| K113     | A |
| K115     | A |
| X_540    | - |
| Y_026    | A |
| B270     | A |



|          | 1                                                | 1                                              | 1                       | 1 | 1 | 1 | 1 | 1 | 1 | 1 | 1 | 1 | 1 | 1 | 1 | 2 | 2 | 2 | 2 | 2 | 2 | 2 |   |
|----------|--------------------------------------------------|------------------------------------------------|-------------------------|---|---|---|---|---|---|---|---|---|---|---|---|---|---|---|---|---|---|---|---|
|          | 2                                                | 2                                              | 3                       | 3 | 4 | 4 | 5 | 5 | 6 | 6 | 7 | 7 | 8 | 8 | 9 | 9 | 0 | 0 | 1 | 1 | 2 | 2 | 3 |
|          | 0                                                | 5                                              | 0                       | 5 | 0 | 5 | 0 | 5 | 0 | 5 | 0 | 5 | 0 | 5 | 0 | 5 | 0 | 5 | 0 | 5 | 0 | 5 | 0 |
| 10_019   | AGAAAAAAGACCCAACTACCAGTAGCTTATCAATACTGGCCACC     | GGCCAAACTTCAGTATCGGCCAC                        |                         |   |   |   |   |   |   |   |   |   |   |   |   |   |   |   |   |   |   |   |   |
| 10_310   | AGAAAAAAGACCCAAACCGCCAGTAGCTTATCAATACTGGCCACC    | GGCCAAACTTCAGTATCGGCCAC                        |                         |   |   |   |   |   |   |   |   |   |   |   |   |   |   |   |   |   |   |   |   |
| 11_233   | -----                                            | -----                                          |                         |   |   |   |   |   |   |   |   |   |   |   |   |   |   |   |   |   |   |   |   |
| 11_277   | GTCCATGGCAACGCCAATCCAATACAGTATCCACAATATCAGCCGGT  | TAGAAAAAAGACCCAAACCGCCAGTAGCTTATCAATACTGGCCACC | GGCCAAACTTCAGTATCGGCCAC |   |   |   |   |   |   |   |   |   |   |   |   |   |   |   |   |   |   |   |   |
| 11_424   | -----                                            | -----                                          |                         |   |   |   |   |   |   |   |   |   |   |   |   |   |   |   |   |   |   |   |   |
| 11_456   | AGAAAAAAGACCCAAACCGCCAGTAGCTTATCAATACTGGCCACC    | GGCCAAACTTCAGTATCGGCCAC                        |                         |   |   |   |   |   |   |   |   |   |   |   |   |   |   |   |   |   |   |   |   |
| 12_216   | -----                                            | -----                                          |                         |   |   |   |   |   |   |   |   |   |   |   |   |   |   |   |   |   |   |   |   |
| 12_419   | -----                                            | -----                                          |                         |   |   |   |   |   |   |   |   |   |   |   |   |   |   |   |   |   |   |   |   |
| 14_023   | TGCCAATCCAGACACAGTATCCACAATATCAGCCGGT            | TAGAAAAAAGACCCAAACCGCCAGTAGCTTATCAATACTGGCCACC | GGCCAAACTTCAGTATCGGCCAC |   |   |   |   |   |   |   |   |   |   |   |   |   |   |   |   |   |   |   |   |
| 16_010   | ATCTGGCAATGCCAATCCAGATACAGTATCCACAATATCAGCCAGT   | TAGAAAAAAGACCCAAACCGCCAGTAGCTTATCAATACTGGCCACC | GGCCAAACTTCAGTATCGGCCAC |   |   |   |   |   |   |   |   |   |   |   |   |   |   |   |   |   |   |   |   |
| 17_029   | -----                                            | -----                                          |                         |   |   |   |   |   |   |   |   |   |   |   |   |   |   |   |   |   |   |   |   |
| 19_157   | GTCACAGCAATGCCAATCCAATACAGTATCCACAATATCAGCCGGT   | TAGAAAAAAGACCCAAACCGCCAGTAGCTTATCAATACTGGCCACC | GGCCAAACTTCAGTATCGGCCAC |   |   |   |   |   |   |   |   |   |   |   |   |   |   |   |   |   |   |   |   |
| 19_238   | -----                                            | -----                                          |                         |   |   |   |   |   |   |   |   |   |   |   |   |   |   |   |   |   |   |   |   |
| 19_352   | -----                                            | -----                                          |                         |   |   |   |   |   |   |   |   |   |   |   |   |   |   |   |   |   |   |   |   |
| 19_407   | GTCACGGCAATGCCAATCCAATACAGTATCCACAATATCAGCCGGT   | TAGAAAAAAGACCCAAACCGCCAGTAGCTTATCAATACTGGCCACC | GGCCAAACTTCAGTATCGGCCAC |   |   |   |   |   |   |   |   |   |   |   |   |   |   |   |   |   |   |   |   |
| 19_639   | -----                                            | -----                                          |                         |   |   |   |   |   |   |   |   |   |   |   |   |   |   |   |   |   |   |   |   |
| 1_059    | ATCCAGCAATGCCAATTCAGTATACAGTATCCACAATATCAGCCGGT  | TAGAAAAAAGACCCAAACCGCCAGTAGCTTATCAATACTGGCCACC | GGCCAAACTTCAGTATCGGCCAC |   |   |   |   |   |   |   |   |   |   |   |   |   |   |   |   |   |   |   |   |
| 1_061    | ATCCCGGCAATGCCAATTCAGTATACAGTATCCACAATATCAGCCGGT | TAGAAAAAAGACCCAAACCGCCAGTAGCTTATCAATACTGGCCACC | GGCCAAACTTCAGTATCGGCCAC |   |   |   |   |   |   |   |   |   |   |   |   |   |   |   |   |   |   |   |   |
| 1_259    | -----                                            | -----                                          |                         |   |   |   |   |   |   |   |   |   |   |   |   |   |   |   |   |   |   |   |   |
| 1_504    | -----                                            | -----                                          |                         |   |   |   |   |   |   |   |   |   |   |   |   |   |   |   |   |   |   |   |   |
| 1_555    | -----                                            | -----                                          |                         |   |   |   |   |   |   |   |   |   |   |   |   |   |   |   |   |   |   |   |   |
| 20_078   | ATCCAGCAATGCCAATCCAGATACAGTATCCACAATATCAGCCGGT   | TAGAAAAAAGACCCAAACCGCCAGTAGCTTATCAATACTGGCCACC | GGCCAAACTTCAGTATCGGCCAC |   |   |   |   |   |   |   |   |   |   |   |   |   |   |   |   |   |   |   |   |
| 21_019   | -----                                            | -----                                          |                         |   |   |   |   |   |   |   |   |   |   |   |   |   |   |   |   |   |   |   |   |
| 22_012   | -----                                            | -----                                          |                         |   |   |   |   |   |   |   |   |   |   |   |   |   |   |   |   |   |   |   |   |
| 22_041   | ATCCCGGCAATGCCAATTCAGTATACAGTATCCACAATATCAGCCGGT | TAGAAAAAAGACCCAAACCGCCAGTAGCTTATCAATACTGGCCACC | GGCCAAACTTCAGTATCGGCCAC |   |   |   |   |   |   |   |   |   |   |   |   |   |   |   |   |   |   |   |   |
| 2_Tan    | -----                                            | -----                                          |                         |   |   |   |   |   |   |   |   |   |   |   |   |   |   |   |   |   |   |   |   |
| 3_014    | -----                                            | -----                                          |                         |   |   |   |   |   |   |   |   |   |   |   |   |   |   |   |   |   |   |   |   |
| 3_209    | TGCTAATCCAGGCACAGTATCCACAATAGCAGGCAGT            | TAGAAAAAAGACCCAAACCGCCAGTAGCTTATCAATACTGGCCACC | GGCCAAACTTCAGTATCGGCCAC |   |   |   |   |   |   |   |   |   |   |   |   |   |   |   |   |   |   |   |   |
| 3_294    | -----                                            | -----                                          |                         |   |   |   |   |   |   |   |   |   |   |   |   |   |   |   |   |   |   |   |   |
| 3_354    | -----                                            | -----                                          |                         |   |   |   |   |   |   |   |   |   |   |   |   |   |   |   |   |   |   |   |   |
| 3_385    | -----                                            | -----                                          |                         |   |   |   |   |   |   |   |   |   |   |   |   |   |   |   |   |   |   |   |   |
| 3_496    | -----                                            | -----                                          |                         |   |   |   |   |   |   |   |   |   |   |   |   |   |   |   |   |   |   |   |   |
| 3_610    | -----                                            | -----                                          |                         |   |   |   |   |   |   |   |   |   |   |   |   |   |   |   |   |   |   |   |   |
| 4_008    | -----                                            | -----                                          |                         |   |   |   |   |   |   |   |   |   |   |   |   |   |   |   |   |   |   |   |   |
| 4_032    | TGCCAATCCAGGCACAGTATCCGCAATACAGCCGGT             | TAGAAAAAAGACCCAAACCGCCAGTAGCTTATCAATACTGGCCACC | GGCCAAACTTCAGTATCGGCCAC |   |   |   |   |   |   |   |   |   |   |   |   |   |   |   |   |   |   |   |   |
| 4_052    | TGCCAATCCAGGCACAGTATCCGCAATACAGCCGGT             | TAGAAAAAAGACCCAAACCGCCAGTAGCTTATCAATACTGGCCACC | GGCCAAACTTCAGTATCGGCCAC |   |   |   |   |   |   |   |   |   |   |   |   |   |   |   |   |   |   |   |   |
| 4_068    | TGCCAATCCAGGCACAGTATCCGCAATACAGCCGGT             | TAGAAAAAAGACCCAAACCGCCAGTAGCTTATCAATACTGGCCACC | GGCCAAACTTCAGTATCGGCCAC |   |   |   |   |   |   |   |   |   |   |   |   |   |   |   |   |   |   |   |   |
| 4_716    | -----                                            | -----                                          |                         |   |   |   |   |   |   |   |   |   |   |   |   |   |   |   |   |   |   |   |   |
| 4_742    | -----                                            | -----                                          |                         |   |   |   |   |   |   |   |   |   |   |   |   |   |   |   |   |   |   |   |   |
| 5_147    | -----                                            | -----                                          |                         |   |   |   |   |   |   |   |   |   |   |   |   |   |   |   |   |   |   |   |   |
| 5_259    | -----                                            | -----                                          |                         |   |   |   |   |   |   |   |   |   |   |   |   |   |   |   |   |   |   |   |   |
| 5_535    | ATCCCGGCAATGCCAATCCAGACACAGTATCCACAATATCAGCCGGT  | TAGAAAAAAGACCCAAACCGCCAGTAGCTTATCAATACTGGCCACC | GGCCAAACTTCAGTATCGGCCAC |   |   |   |   |   |   |   |   |   |   |   |   |   |   |   |   |   |   |   |   |
| 5_544    | -----                                            | -----                                          |                         |   |   |   |   |   |   |   |   |   |   |   |   |   |   |   |   |   |   |   |   |
| 6_098    | GCCATGGCAATGCCAATCCAGATACAGTATCCACAATATCAGCCAGT  | TAGAAAAAAGACCCAAACCGCCAGTAGCTTATCAATACTGGCCACC | GGCCAAACTTCAGTATCGGCCAC |   |   |   |   |   |   |   |   |   |   |   |   |   |   |   |   |   |   |   |   |
| 6_178    | ATCCCGGCAATGCCAATTCAGATGACAGTATCCACAATATAGCTGGT  | TAGAAAAAAGACCCAAACCGCCAGTAGCTTATCAATACTGGCCACC | GGCCAAACTTCAGTATCGGCCAC |   |   |   |   |   |   |   |   |   |   |   |   |   |   |   |   |   |   |   |   |
| 6_240    | -----                                            | -----                                          |                         |   |   |   |   |   |   |   |   |   |   |   |   |   |   |   |   |   |   |   |   |
| 6_324    | -----                                            | -----                                          |                         |   |   |   |   |   |   |   |   |   |   |   |   |   |   |   |   |   |   |   |   |
| 7_345    | -----                                            | -----                                          |                         |   |   |   |   |   |   |   |   |   |   |   |   |   |   |   |   |   |   |   |   |
| 7_450    | GTCCAGGCAATGCCAATCCAATACAGTATCCACAATATCAGCCGGT   | TAGAAAAAAGACCCAAACCGCCAGTAGCTTATCAATACTGGCCACC | GGCCAAACTTCAGTATCGGCCAC |   |   |   |   |   |   |   |   |   |   |   |   |   |   |   |   |   |   |   |   |
| 8_047    | TGCCAATCCAGGCACAGTATCCGCAATACAGCCGGT             | TAGAAAAAAGACCCAAACCGCCAGTAGCTTATCAATACTGGCCACC | GGCCAAACTTCAGTATCGGCCAC |   |   |   |   |   |   |   |   |   |   |   |   |   |   |   |   |   |   |   |   |
| 8_074    | TGCCAATCCAGGCACAGTATCCGCAATACAGCCGGT             | TAGAAAAAAGACCCAAACCGCCAGTAGCTTATCAATACTGGCCACC | GGCCAAACTTCAGTATCGGCCAC |   |   |   |   |   |   |   |   |   |   |   |   |   |   |   |   |   |   |   |   |
| 8_094    | TGCCAATCCAGGCACAGTATCCGCAATACAGCCGGT             | TAGAAAAAAGACCCAAACCGCCAGTAGCTTATCAATACTGGCCACC | GGCCAAACTTCAGTATCGGCCAC |   |   |   |   |   |   |   |   |   |   |   |   |   |   |   |   |   |   |   |   |
| 8_121    | -----                                            | -----                                          |                         |   |   |   |   |   |   |   |   |   |   |   |   |   |   |   |   |   |   |   |   |
| 8_235    | -----                                            | -----                                          |                         |   |   |   |   |   |   |   |   |   |   |   |   |   |   |   |   |   |   |   |   |
| 8_525    | -----                                            | -----                                          |                         |   |   |   |   |   |   |   |   |   |   |   |   |   |   |   |   |   |   |   |   |
| 8_559    | TGCCAATCCAGGCACAGTATCCACAATATCAGCCGGT            | TAGAAAAAAGACCCAAACCGCCAGTAGCTTATCAATACTGGCCACC | GGCCAAACTTCAGTATCGGCCAC |   |   |   |   |   |   |   |   |   |   |   |   |   |   |   |   |   |   |   |   |
| 9_307    | -----                                            | -----                                          |                         |   |   |   |   |   |   |   |   |   |   |   |   |   |   |   |   |   |   |   |   |
| 9_340    | ATCCAGCAATGCCAATCCAGATGACAGTATCCACAATATCAGCCGGT  | TAGAAAAAAGACCCAAACCGCCAGTAGCTTATCAATACTGGCCACC | GGCCAAACTTCAGTATCGGCCAC |   |   |   |   |   |   |   |   |   |   |   |   |   |   |   |   |   |   |   |   |
| HML2_Rep | -----                                            | -----                                          |                         |   |   |   |   |   |   |   |   |   |   |   |   |   |   |   |   |   |   |   |   |
| K113     | -----                                            | -----                                          |                         |   |   |   |   |   |   |   |   |   |   |   |   |   |   |   |   |   |   |   |   |
| K115     | -----                                            | -----                                          |                         |   |   |   |   |   |   |   |   |   |   |   |   |   |   |   |   |   |   |   |   |
| X_540    | -----                                            | -----                                          |                         |   |   |   |   |   |   |   |   |   |   |   |   |   |   |   |   |   |   |   |   |
| Y_026    | TGCCAATCCAGGCACAGTATCCACAATATCAGCCGGT            | TAGAAAAAAGACCCAAACCGCCAGTAGCTTATCAATACTGGCCACC | GGCCAAACTTCAGTATCGGCCAC |   |   |   |   |   |   |   |   |   |   |   |   |   |   |   |   |   |   |   |   |
| 93       | GTCCAGGCAATGCCAATCCAATACAGTATCCACAATATCAGCCAGT   | TAGAAAAAAGACCCAAACCGCCAGTAGCTTATCAATACTGGCCACC | GGCCAAACTTCAGTATCGGCCAC |   |   |   |   |   |   |   |   |   |   |   |   |   |   |   |   |   |   |   |   |

2 2 2 2 2 2 2 2 2 2 2 2 2 3 3 3 3 3 3 3 3 3 3
3 4 4 5 5 6 6 7 7 8 8 9 9 0 0 1 1 2 3 3 3 3 3
5 0 5 0 5 0 5 0 5 5 5 5 5 0 5 0 0 0 0 0 0 0 0 0
10\_019 CCCC-AGAAATCAGTATGGATA TCCAGGAATGCCCCAGCACCCAGGCGAG---GGCGCCATACCCCTCAGCCACCCTACTAGCAGAC
10\_310 CCCC-AGAAATCAGTATGGATA TCCAGGAATGCCCCAGCACCCAGGCGAG---GGCGCCATACCCCTCAGCCGCCCTACTAGCAGAC
11\_233 -----
11\_277 CCCC-AGAAATCAGTATGGACAGCCAGGAGTGT TCCAGCACCCACAGGCGAG---GGCGCTATAGCCTCAGCCGCCCTACTATAAGAC
11\_424 CCCC-AGAAATCAGTATGGATA TCCAGGAATGCCCCAGCACCCAGGCGAG---GGCGCCATACCCCTCAGCCACCCTACTAGCAGAC
11\_456 CCCC-AGAAATCAGTATGGATA TCCAGGAATGCCCCAGCACCCAGGCGAG---GGCGCCATACCCCTCAGCCGCCCTACTAGCAGAC
12\_216 CCCC-AGAAATCAGTATGGATA TCCAGGAATGCCCCAGCACCCAGGCGAG---GGCGCCATACCCCTCAGCCGCCCTACTAGCAGAC
12\_419 -----
14\_023 CTCC-AGTGGTTCAGTATAGATCCAGGTGTGTGTCCCTGTGCCAAATACAG---GGCAGTATAGCAACAACCCATGGCGATGGTGT
16\_010 CTCC-AGAGTTCAAATACAGACTCAAGTGGTGTGTGCTATGCCAAATTCAC---GGCATCGTACAAGCAACCCATGGCGGTGGTGTTAATAGCTCAGCACCCAGGCGGG
17\_029 -----
19\_157 CCTT-AGAAATCAGCATGGACAGCCAGGAATGTTTCCAGCACCCACAGGCGAG---GGCATATATCCGCAGCCTCCCACTATGAGAC
19\_238 CCCC-AGAAATCAGTATGGATA TCCAGGAATGCCCCAGCACCCAGGCGAG---GGCGCCATACCCCTCAGCCACCCTACTAGCAGAC
19\_352 CCTT-AGAAATCAGTATGGATA TCCAGGAATGCCCCAGCACCCAGGCGAG---GGCGCCATACCCCTCAGCCGCCCTACTAGCAGAC
19\_407 CCCC-AGAAATCAGTATGGACAGCCAGGAATGTTTCCAGCACCCACAGGCGAG---GGCGCTATATCCTCAGCAGCCCACTATGAGAT
19\_639 -----
1\_059 CTCC-GGAGGTTCAATACAGACTCAAGCTGTGTGTCCCGTGCCAAATAGCAC---GGCACCTCACCAGCAACCCA---GPGGTGT
1\_061 CTCC-GGAGGTTCAATACAGACTCAAGCTGTGTGTCCCGTGCCAAATAGCAC---GGCACCTCACCAGCAACCCA---GCGGTGT
1\_259 CCCC-AGAAATCAGTATGGATA TCCAGGAATGCCCCAGCACCCAGGCGAG---GGCGCCATACCCCTCAGCCGCCCTACTAGCAGAC
1\_504 CCCC-AGAAATCAGTATGGATA TCCAGGAATGCCCCAGCACCCAGGCGAG---GGCGCCATACCCCTCAGCCGCCCTACTAGCAGAC
1\_555 CCCC-AGAAATCAGTATGGATA TCCAGGAATGCCCCAGCACCCAGGCGAG---GGAGCCATACCCCTCAGCCGCCCTACTAGCAGAC
20\_078 CCCCAGAAATCAGTATGGACAGCCAGGAATGTTTCCAGCACCCACAGGCGAGCACGGCGATATAGCCTCAGCCGCCCTACTAGCAGAC
21\_019 CCCC-AGAAATCAGTATGGATA TCCAGGAATGCCCCAGCACCCAGGCGAG---GGCGCCATACCCCTCAGCCGCCCTACTAGCAGAC
22\_012 CCCC-AGAAATCAGTATGGATA TCCAGGAATGCCCCAGCACCCAGGCGAG---GGCGCCATACCCCTCAGCCGCCCTACTAGCAGAC
22\_041 CTTT-AGAGTTCAAATACAGACTCAAGCTGTGTGTCCCTGTGCCAAATAGCAC---GGCACCATACCCAGCAACCCAGCGGATGGCGTCTAATCACCAGCAACACAGGACGGG
2\_Tan CCCC-AGAAATCAGTATGGATA TCCAGGAATGCCCCAGCACCCAGGCGAG---GGCGCCATACCCCTCAGCCGCCCTACTAGCAGAC
3\_014 CCCC-AGAAATCAGTATGGACATCCAGGAATGCTCCAGCACCCACAGGCGAG---GGCGCCATACCCCTCAGCCGCCCTACTATGAGAC
3\_209 CTCC-AGAGTTCAGTATGGATCTCAGCTGGTGGCTCTGTGCTAAATAGCAA---GACATATATCAACAACCCAGGGGATGGCGT
3\_294 CCCC-AGAAATCAGTATGGATA TCCAGGAATGCCCCAGCACCCAGGCGAG---GGCGCCATACCCCTCAGCCGCCCTACTAGCAGAC
3\_354 CCCC-AGAAATCAGTATGGATA TCCAGGAATGCCCCAGCACCCACAGGCGAG---GGCGCCATACCCCTCAGCCGCCCTACTAGCAGAC
3\_385 CCCC-AGAAATCAGTATGGATA TCCAGGAATGCCCCAGCACCCACAGGCGAG---GGCGCCATACCCCTCAGCCGCCCTACTAGCAGAC
3\_496 CCCC-AGAAATCAGTATGGATA TCCAGGAATGCCCCAGCACCCACAGGCGAG---GGCGCCATACCCCTCAGCCGCCCTACTAGCAGAC
3\_610 CCCC-AGAAATCAGTATGGATA TCCAGGAATGCCCCAGCACCCACAGGCGAG---GGCGCCATACCCCTCAGCCGCCCTACTAGCAGAC
4\_008 -----AGCAACCCAGGGCGGTGGCG
4\_032 CTCC-AGAGGTTTCAGTATGGATCTCAGCGGTGGCTCTGTGCCAAATAGCAA---GGCATATATCAACAACCCAGGGGATGGCGT
4\_052 CTCC-AGAGGTTTCAGTATGGATCTCAGCGGTGGCTCTGTGCCAAATAGCAA---GGCATATATCAACAACCCAGGGGATGGCGT
4\_068 CTCC-AGAGTTCAGTATGGATCTCAGCGGTGGCTCTGTGCCAAATAGCAA---GGCATATATCAACAACCCAGGGGATGGCGT
4\_716 CCTT-AGAAATCAGTATGGATA TCCAGGAATGCCCCAGCACCCAGGCGAG---GGCGCCATACCCCTCAGCCGCCCTACTAGCAGAC
4\_742 CCCC-AGAAATCAGTATGGACATCCAGGAATGCTGCCAGCATACAGAAATAG---GTTGCCACACCCCTCAGCCGCCCTACTAGCAGAC
5\_147 CCCC-AGAAATCAGTATGGATA TCCAGGAATGCCCCAGCACCCACAGGCGAG---GGTGGCATACCCCTCAGCCGCCCTACTAGCAGAC
5\_259 CCCC-AGAAATCAGTATGGACATCCAGGAATGCTCCAGCACCCACAGGCGAG---GGAGCCATACCCCTCAGCCACCCTACTATGACAC
5\_535 TTCC-AGAGGTTTCAGTATAGATCTCAGCGGGGTGTCCCTGTGCCAAATACAG---GGCATATATCAGCAACCCAGCGGATGGCGT
5\_544 CCCC-AGAAATCAGTATGGATA TCCAGGAATGCCCCAGCACCCACAGGCGAG---GGCGCCATACCCCTCAGCCGCCCTACTAGCAGAC
6\_098 CCCC-AGAAATCAGTATGGACACCCAGGAATGTTTCCAGCACCCACAGGCGAG---GGCTCTATATCCTCAGCCGTCCACTGPGAGAC
6\_178 CTCC-AGAGGTTAAATACAGACTCAAGTGGTGTGTCCCTGTGCCAAATAGCAC---GGCACCATACCCAGCAACCCAGGGCAGTGGTGT
6\_240 -----
6\_324 CCCC-AGAAATCAGTATGGATA TCCAGGAATGCCCCAGCACCCACAGGCGAG---GGCGCCATACCCCTCAGCCGCCCTACTAGCAGAC
7\_345 CCCC-AGAAATCAGTATGGATA TCCAGGAATGCCCCAGCACCCACAGGCGAG---GGCGCCATACCCCTCAGCCGCCCTACTAGCAGAC
7\_450 CCCC-GGAAATCAGTATGGACAGCCAGGAATGTTTCCAGCACCCACAGGCGAG---GGCGCCATACCCCTCAGCCACCCTACTAGCAGAC
8\_047 CTCC-AGAGGTTTCAGTATGGATCTCAGCGGTGGCTCTGTGCCAAATAGCAA---GGCAGTATATCAACAACCCAGGGGATGGCGT
8\_074 CTCC-AGAGGTTTCAGTATGGATCTCAGCGGTGGCTCTGTGCCAAATAGCAA---GGCATATATCAA---CCCAAGCGGATGGCGT
8\_094 CTCC-AGAGGTTTCAGTATGGATCTCAGCGGTGGCTCTGTGCCAAATAGCAA---GGCATATATCAACAACCCAGGGGATGGCGT
8\_121 -----
8\_235 -----
8\_525 CCCC-AGAAATCAGTATGGATA TCCAGGAATGCCCCAGCACCCACAGGCGAG---GGCGCCATACCCCTCAGCCGCCCTACTAGCAGAC
8\_559 CTCC-AGAGTTCAGTATAGATCCAGATGGGA--TCCCTGTGCCAAATAGTAG---GGCATATATCAACAACCCAGGGGATGGTGT
9\_307 -----
9\_340 CCCC-AGAGTATCAGTATGGATGCCAGGA--TGT TCCAGCACCCACAGGCGAG---GGCGCTATAGCCGCAGCCGCCCTACTATGAGAC
HML2\_Rep CCCC-AGAAATCAGTATGGATA TCCAGGAATGCCCCAGCACCCACAGGCGAG---GGCGCCATACCCCTCAGCCGCCCTACTAGCAGAC
K113 CCCC-AGAAATCAGTATGGATA TCCAGGAATGCCCCAGCACCCACAGGCGAG---GGCGCCATACCCCTCAGCCGCCCTACTAGCAGAC
K115 CCCC-AGAAATCAGTATGGATA TCCAGGAATGCCCCAGCACCCACAGGCGAG---GGAGCCATACCCCTCAGCCGCCCTACTAGCAGAC
X\_540 -----
Y\_026 CTCC-AGAGGTTTCAGTATAGAACTCAGCTGGTGGCGCCAAAC--CCAAATAGCAC---GGCATATATCAACATCCCAAGGCAATGGTGT
93 CCCC-GGAAATCAGTATGGACAGCCAGGAATGTTTCCAGCACCCACAGGCGAG---GGCGCCATACCCCTCAGCCACCCTACTATGAGAC

|          | 3<br>5<br>0                                                                              | 3<br>5<br>5                                                                     | 3<br>6<br>0 | 3<br>6<br>5 | 3<br>7<br>0 | 3<br>7<br>5 | 3<br>8<br>0 | 3<br>8<br>5 | 3<br>9<br>0 | 3<br>9<br>5 | 4<br>0<br>0 | 4<br>0<br>5 | 4<br>1<br>0 | 4<br>1<br>5 | 4<br>2<br>0 | 4<br>2<br>5 | 4<br>3<br>0 | 4<br>3<br>5 | 4<br>4<br>0 | 4<br>4<br>5 | 4<br>5<br>0 | 4<br>5<br>5 | 4<br>6<br>0 |
|----------|------------------------------------------------------------------------------------------|---------------------------------------------------------------------------------|-------------|-------------|-------------|-------------|-------------|-------------|-------------|-------------|-------------|-------------|-------------|-------------|-------------|-------------|-------------|-------------|-------------|-------------|-------------|-------------|-------------|
| 10_019   | -----TTAATCATAAGCCACCACCTAGTAGACAGGGTAGTGAATTACATGAAATTATTGATAAG-----TCAAGAAAAGG AAGGA   |                                                                                 |             |             |             |             |             |             |             |             |             |             |             |             |             |             |             |             |             |             |             |             |             |
| 10_310   | -----TTAATCCTACAGCCACCACCTAGTAGACAGGGTAGTGAATTACATGAAATTATTGATAAA-----TCAAGAAAAGG AAGGA  |                                                                                 |             |             |             |             |             |             |             |             |             |             |             |             |             |             |             |             |             |             |             |             |             |
| 11_233   | -----GCCCATTTCGG                                                                         |                                                                                 |             |             |             |             |             |             |             |             |             |             |             |             |             |             |             |             |             |             |             |             |             |
| 11_277   | -----TTATCCTACAGCACCACCTAGTGACAGGTAGTGCATTACATAAAATTATTGATAAG-----GCAAGAAAACAAGGA        |                                                                                 |             |             |             |             |             |             |             |             |             |             |             |             |             |             |             |             |             |             |             |             |             |
| 11_424   | -----TTAATCCTACAGCCACCACCTAGTAGACAGGGTAGTGAATTACATGAAATTATTGATAAA-----TCAAGAAAAGG AAGGA  |                                                                                 |             |             |             |             |             |             |             |             |             |             |             |             |             |             |             |             |             |             |             |             |             |
| 11_456   | -----TTAATCCTACAGCCACCACCTAGTAGACAGGGTAGTGAATTACATGAAATTATTGATAAG-----AGAAAAGG AAGGA     |                                                                                 |             |             |             |             |             |             |             |             |             |             |             |             |             |             |             |             |             |             |             |             |             |
| 12_216   | -----TTAATCCTACAGCCACCACCTAGTAGACAGGGTAGTGAATTACATGAAATTATTGATAAA-----TCAAGAAAAGG AAGGA  |                                                                                 |             |             |             |             |             |             |             |             |             |             |             |             |             |             |             |             |             |             |             |             |             |
| 12_419   | -----GCTGTT-GGG                                                                          |                                                                                 |             |             |             |             |             |             |             |             |             |             |             |             |             |             |             |             |             |             |             |             |             |
| 14_023   | -----TTGATCCTACACTACCACCTAGTGACAGGTAGTGCCTGCAAAAAATCATTGATAAA-----GCCAGAAAACAAGGA        |                                                                                 |             |             |             |             |             |             |             |             |             |             |             |             |             |             |             |             |             |             |             |             |             |
| 16_010   | GCGCTGTGTCCTCAGCCGCCACTATGAGAC                                                           | TTAATCCAACAGCACCACCTAGTGACAGGTAGTGCACACTGCACGGCATCATTGATGAA-----GCTAGAAAACAAGGA |             |             |             |             |             |             |             |             |             |             |             |             |             |             |             |             |             |             |             |             |             |
| 17_029   | -----                                                                                    |                                                                                 |             |             |             |             |             |             |             |             |             |             |             |             |             |             |             |             |             |             |             |             |             |
| 19_157   | -----TTAATCCTACATCACCACCTAGTAGACAGGGTGGTGCATTACATAAAATTATT---AAA-----GCAAGAAAACAAGGA     |                                                                                 |             |             |             |             |             |             |             |             |             |             |             |             |             |             |             |             |             |             |             |             |             |
| 19_238   | -----TTAATCCTATGGTACCACCTAGTAGACAGGGTAGTGAATTACAGAAATTATTGATAAG-----TCAAGAAAAGG AAGGA    |                                                                                 |             |             |             |             |             |             |             |             |             |             |             |             |             |             |             |             |             |             |             |             |             |
| 19_352   | -----TTAATCCTACAGCCACCACCTAGTAGACAGGGTAGTGAATTACATGAAATTATTGATAAA-----TCAAGAAAAGG AAGGA  |                                                                                 |             |             |             |             |             |             |             |             |             |             |             |             |             |             |             |             |             |             |             |             |             |
| 19_407   | -----TTAATCCTACACACCACCTAGTGACAGGGTAGTGCATTACATAAAATTATTGATAAG-----GCAAGAAAACAAGGA       |                                                                                 |             |             |             |             |             |             |             |             |             |             |             |             |             |             |             |             |             |             |             |             |             |
| 19_639   | -----GTCATA-GGG                                                                          |                                                                                 |             |             |             |             |             |             |             |             |             |             |             |             |             |             |             |             |             |             |             |             |             |
| 1_059    | -----TTAATCCTACATCACCACCTAGTGACAGGTAGTACACTGCATGAAATCATTGATAAA-----GCCAGAAAACAAGGA       |                                                                                 |             |             |             |             |             |             |             |             |             |             |             |             |             |             |             |             |             |             |             |             |             |
| 1_061    | -----TTAATCCTACATCACCACCTAGTGACAGGTAGTACACTGCATGAAATCATTGATAAA-----GCCAGAAAACAAGGA       |                                                                                 |             |             |             |             |             |             |             |             |             |             |             |             |             |             |             |             |             |             |             |             |             |
| 1_259    | -----TTAATCCTATGGCACCACCTAGTAGACAGGGTAGTGAATTACATGAAATTATTGATAAA-----TCAAGAAAAGG AAGGA   |                                                                                 |             |             |             |             |             |             |             |             |             |             |             |             |             |             |             |             |             |             |             |             |             |
| 1_504    | -----TTAATCCTACAGCCACCACCTAGTAGACAGGGTAGTGAATTACATGAAATTATTGATAAA-----TCAAGAAAAGG AAGGA  |                                                                                 |             |             |             |             |             |             |             |             |             |             |             |             |             |             |             |             |             |             |             |             |             |
| 1_555    | -----AATCCTATGGCACCACCTAGTAGACAGGGTAGTGAATTACATGAAATTATTGAGAAG-----TCAAGAAAAGG AAGGA     |                                                                                 |             |             |             |             |             |             |             |             |             |             |             |             |             |             |             |             |             |             |             |             |             |
| 20_078   | -----TTAATCCTATGGCACCACCTAGTGACAGGGTAGTGCATTACATGAAATTATTGAGAAG-----GCCAGAAAACAAGGA      |                                                                                 |             |             |             |             |             |             |             |             |             |             |             |             |             |             |             |             |             |             |             |             |             |
| 21_019   | -----TTAATCCTACAGCCACCACCTAGTAGACAGGTAGTGAATTACATGAAATTATTGATAAA-----TCAAGAAAAGG AAGGA   |                                                                                 |             |             |             |             |             |             |             |             |             |             |             |             |             |             |             |             |             |             |             |             |             |
| 22_012   | -----TTAATCCTACAGCCACCACCTAGTAGACAGGGTAGTGAATTACATGAAATTATTGATAAA-----TCAAGAAAAGG AAGGA  |                                                                                 |             |             |             |             |             |             |             |             |             |             |             |             |             |             |             |             |             |             |             |             |             |
| 22_041   | GCGCTGTATCCTCAGCCGCCACTGTGAGAC                                                           | TTAATCCTACAGCATCACCTAGTGACAGGGTGGTGCCTGCATGCAGTCATTGATGAA-----GCCAGAAAACAAGGC   |             |             |             |             |             |             |             |             |             |             |             |             |             |             |             |             |             |             |             |             |             |
| 2_Tan    | -----TTAATCCTACAGCCACCACCTAGTAGACAGGGTAGTAAATTACATGAAATTATTGATAAA-----TCAAGAAAAGG AAGGA  |                                                                                 |             |             |             |             |             |             |             |             |             |             |             |             |             |             |             |             |             |             |             |             |             |
| 3_014    | -----TTAATCCTACAGCACCACCTAATAGACAGGGTAGTGCATTACATAAAATTATTGATAAG-----TCAAGAAAACAAGGA     |                                                                                 |             |             |             |             |             |             |             |             |             |             |             |             |             |             |             |             |             |             |             |             |             |
| 3_209    | -----TTGATCCTACAGCACCACCTAGTGACAGGTAGTGCCTGCATGACACCATTGCTACA-----GCCAGAAAACAAGGA        |                                                                                 |             |             |             |             |             |             |             |             |             |             |             |             |             |             |             |             |             |             |             |             |             |
| 3_294    | -----TTAATCCTACAGCATCACCTAGTGACAGGTAGTGCCTGCATGACACCATTGCTACA-----GCCAGAAAACAAGGA        |                                                                                 |             |             |             |             |             |             |             |             |             |             |             |             |             |             |             |             |             |             |             |             |             |
| 3_354    | -----TTAATCCTACAGCACCACCTAGTAGACAGGGTAGTGAATTACATGAAATTATTGATAAA-----TCAAGAAAAGG AAGGA   |                                                                                 |             |             |             |             |             |             |             |             |             |             |             |             |             |             |             |             |             |             |             |             |             |
| 3_385    | -----TTAATCCTATGGCACCACCTAGTAGACAGGGTAGTGAATTACATGAAATTATTGATAAA-----TCAAGAAAAGG AAGGA   |                                                                                 |             |             |             |             |             |             |             |             |             |             |             |             |             |             |             |             |             |             |             |             |             |
| 3_496    | -----TTAATCCTACAGCCACCACCTAGTAGACAGGGTAGTGAATTACATGAAATTATTGATAAA-----TCAAGAAAAGG AAGGA  |                                                                                 |             |             |             |             |             |             |             |             |             |             |             |             |             |             |             |             |             |             |             |             |             |
| 3_610    | -----TTAATCCTACAGCCACCACCTAGTAGACAGGGTAGTGAATTACATGAAATTATTGATAAA-----TCAAGAAAAGG AAGGA  |                                                                                 |             |             |             |             |             |             |             |             |             |             |             |             |             |             |             |             |             |             |             |             |             |
| 4_008    | -----TTAATCCTATGGCACCACCTAGTGACAGGTAGTGCCTGCATGACACCATTGCTACA-----GCCAGAAAACAAGGA        |                                                                                 |             |             |             |             |             |             |             |             |             |             |             |             |             |             |             |             |             |             |             |             |             |
| 4_032    | -----TTGATCCTACAGTACCACCTAGTGACAGGTAGTGCCTGCATGACACCATTGCTACA-----GCCAGAAAACAAGGA        |                                                                                 |             |             |             |             |             |             |             |             |             |             |             |             |             |             |             |             |             |             |             |             |             |
| 4_052    | -----TTGATCCTACAGTACCACCTAGTGACAGGTAGTGCCTGCATGACACCATTGCTACA-----GCCAGAAAACAAGGA        |                                                                                 |             |             |             |             |             |             |             |             |             |             |             |             |             |             |             |             |             |             |             |             |             |
| 4_068    | -----TTGATCCTACAGTACCACCTAGTGACAGGTAGTGCCTGCATGACACCATTGCTACA-----GCCAGAAAACAAGGA        |                                                                                 |             |             |             |             |             |             |             |             |             |             |             |             |             |             |             |             |             |             |             |             |             |
| 4_716    | -----TTAATCCTACAGCCACCACCTAGTAGACAGGGTAGTGAATTACATGAAATTATTGATAAA-----TCAAGAAAAGG AAGGA  |                                                                                 |             |             |             |             |             |             |             |             |             |             |             |             |             |             |             |             |             |             |             |             |             |
| 4_742    | -----TTAATCCTATGGCACCACCTAGTAGACAGGGTAGTGCATTACATAAAATTATTGTCAGAAAATTATAGTCAAGAAAACAAGGA |                                                                                 |             |             |             |             |             |             |             |             |             |             |             |             |             |             |             |             |             |             |             |             |             |
| 5_147    | -----TTAATCCTATGGCACCACCTAGTAGACAGGGTAGTGAATTACATGAAATTATTGATAAA-----TCAAGAAAAGG AAGGA   |                                                                                 |             |             |             |             |             |             |             |             |             |             |             |             |             |             |             |             |             |             |             |             |             |
| 5_259    | -----TTAATCCAACAGCACCACCTAGTCAACAGGGTAGTGCCTACATAAAATTATTGATAAT-----TCAAGAAAACAAGGA      |                                                                                 |             |             |             |             |             |             |             |             |             |             |             |             |             |             |             |             |             |             |             |             |             |
| 5_535    | -----TTGATCCTACAGCACCACCTAGTGACAGGTAGTGCCTGCATGACACCATTGCTACA-----GCCAGAAAACAAGGA        |                                                                                 |             |             |             |             |             |             |             |             |             |             |             |             |             |             |             |             |             |             |             |             |             |
| 5_544    | -----TTAATCCTATGGCACCACCTAGTAGACAGGGTAGTGAATTACATGAAATTATTGATAAA-----TCAAGAAAAGG AAGGA   |                                                                                 |             |             |             |             |             |             |             |             |             |             |             |             |             |             |             |             |             |             |             |             |             |
| 6_098    | -----TTAATCCTACAGCACCACCTAGTGACAGGTAGTGCCTGCATGACACCATTGCTACA-----GCCAGAAAACAAGGA        |                                                                                 |             |             |             |             |             |             |             |             |             |             |             |             |             |             |             |             |             |             |             |             |             |
| 6_178    | -----TTAATCCTACAGCACCACCTAGTGACAGGTAGTGCCTGCATGAAATTATTGATAAA-----GCCACTAAACAAGGA        |                                                                                 |             |             |             |             |             |             |             |             |             |             |             |             |             |             |             |             |             |             |             |             |             |
| 6_240    | -----GCCATT-GGG                                                                          |                                                                                 |             |             |             |             |             |             |             |             |             |             |             |             |             |             |             |             |             |             |             |             |             |
| 6_324    | -----TTAATCCTACAGCCACCACCTAGTAGACAGGGTAGTGAATTACATGAAATTATTGATAAA-----TCAAGAAAAGG AAGGA  |                                                                                 |             |             |             |             |             |             |             |             |             |             |             |             |             |             |             |             |             |             |             |             |             |
| 7_345    | -----TTAATCCTACAGCCACCACCTAGTAGACAGGGTAGTGAATTACATGAAATTATTGATAAA-----TCAAGAAAAGG AAGGA  |                                                                                 |             |             |             |             |             |             |             |             |             |             |             |             |             |             |             |             |             |             |             |             |             |
| 7_450    | -----TTAATCCTACAGCACCACCTAGTGAGCAGGGTAGTGAATTACATAAAATTATTGATGAG-----GCCAGAAAACAAGGA     |                                                                                 |             |             |             |             |             |             |             |             |             |             |             |             |             |             |             |             |             |             |             |             |             |
| 8_047    | -----TTGATCCTACAGTACCACCTAGTGACAGGTAGTGCCTGCATGACACCATTGCTACA-----GCCAGAAAACAAGGA        |                                                                                 |             |             |             |             |             |             |             |             |             |             |             |             |             |             |             |             |             |             |             |             |             |
| 8_074    | -----TTGATCCTACAGTACCACCTAGTGACAGGTAGTGCCTGCATGACACCATTGCTACA-----GCCAGAAAACAAGGA        |                                                                                 |             |             |             |             |             |             |             |             |             |             |             |             |             |             |             |             |             |             |             |             |             |
| 8_094    | -----TTGATCCTACAGTACCACCTAGTGACAGGTAGTGCCTGCATGACACCATTGCTACA-----GCCAGAAAACAAGGA        |                                                                                 |             |             |             |             |             |             |             |             |             |             |             |             |             |             |             |             |             |             |             |             |             |
| 8_121    | -----                                                                                    |                                                                                 |             |             |             |             |             |             |             |             |             |             |             |             |             |             |             |             |             |             |             |             |             |
| 8_235    | -----GCCTTT-GGG                                                                          |                                                                                 |             |             |             |             |             |             |             |             |             |             |             |             |             |             |             |             |             |             |             |             |             |
| 8_525    | -----TTAATCCTACAGCCACCACCTAGTAGACAGGGTAGTGAATTACATGAAATTATTGATAAA-----TCAAGAAAAGG AAGGA  |                                                                                 |             |             |             |             |             |             |             |             |             |             |             |             |             |             |             |             |             |             |             |             |             |
| 8_559    | -----TTGATCCTACAGTACCAGCTAGTGACAGGTAGTGCCTGCATGACACCATTGATAA-----GCCAGAAAACAAGGA         |                                                                                 |             |             |             |             |             |             |             |             |             |             |             |             |             |             |             |             |             |             |             |             |             |
| 9_307    | -----GCCATT-GGG                                                                          |                                                                                 |             |             |             |             |             |             |             |             |             |             |             |             |             |             |             |             |             |             |             |             |             |
| 9_340    | -----GTAATCCTACAGCACCACCTAGTGACAGGGTGGTGCATTACATAAAATTATTGAAAAG-----ACA---AAACAAGGG      |                                                                                 |             |             |             |             |             |             |             |             |             |             |             |             |             |             |             |             |             |             |             |             |             |
| HML2_Rep | -----TTAATCCTACAGCCACCACCTAGTAGACAGGGTAGTAAATTACATGAAATTATTGATAAA-----TCAAGAAAAGG AAGGA  |                                                                                 |             |             |             |             |             |             |             |             |             |             |             |             |             |             |             |             |             |             |             |             |             |
| K113     | -----TTAATCCTACAGCCACCACCTAGTAGACAGGGTAGTGAATTACATGAAATTATTGATAAA-----TCAAGAAAAGG AAGGA  |                                                                                 |             |             |             |             |             |             |             |             |             |             |             |             |             |             |             |             |             |             |             |             |             |
| K115     | -----TTAATCCTACAGCCACCACCTAGTAGACAGGGTAGTGAATTACATGAAATTATTGATAAA-----TCAAGAAAAGG AAGGA  |                                                                                 |             |             |             |             |             |             |             |             |             |             |             |             |             |             |             |             |             |             |             |             |             |
| X_540    | -----GCCGTC-AGG                                                                          |                                                                                 |             |             |             |             |             |             |             |             |             |             |             |             |             |             |             |             |             |             |             |             |             |
| Y_026    | -----TTGATCCTACAGTACCACCTAGTGACAGGTAGTGCCTGCATGAAATCATTGATAAA-----GCCAGAAAACAAGGA        |                                                                                 |             |             |             |             |             |             |             |             |             |             |             |             |             |             |             |             |             |             |             |             |             |
| 93       | -----TTAATCCTACAGCACCACCTAGTGACAGGGTAGTGAATTACATAAAATTATTGATGAG-----GCCAGAAAACAAGGA      |                                                                                 |             |             |             |             |             |             |             |             |             |             |             |             |             |             |             |             |             |             |             |             |             |







|          | 6                                                                                                                | 7 | 7 | 7 | 7 | 7 | 7 | 7 | 7 | 7 | 7 | 7 | 7 | 7 | 7 | 7 | 7 | 7 | 7 | 7 | 7 | 7 | 7 | 7 | 7 | 7 | 8 | 8 |
|----------|------------------------------------------------------------------------------------------------------------------|---|---|---|---|---|---|---|---|---|---|---|---|---|---|---|---|---|---|---|---|---|---|---|---|---|---|---|
|          | 9                                                                                                                | 0 | 0 | 1 | 1 | 2 | 2 | 3 | 3 | 4 | 4 | 5 | 5 | 6 | 6 | 7 | 7 | 8 | 8 | 9 | 9 | 9 | 9 | 9 | 9 | 9 | 0 | 0 |
|          | 5                                                                                                                | 0 | 5 | 0 | 5 | 0 | 5 | 0 | 5 | 0 | 5 | 0 | 5 | 0 | 5 | 0 | 5 | 0 | 5 | 0 | 5 | 0 | 5 | 0 | 5 | 0 | 5 | 0 |
| 10_019   | TTCC-TTA--TGATTGGGAGA-TTCTGGCAAAATCGTCTCT-CTCACCCTC-TCAATTTTACAATTTAAGACTTGGTG-----GATTGATGG-----GCACAAGAAC      |   |   |   |   |   |   |   |   |   |   |   |   |   |   |   |   |   |   |   |   |   |   |   |   |   |   |   |
| 10_310   | TTCC-TTA--TGATTGGGAGA-TTCTGGCAAAATCGTCTCT-CTCACCCTC-TCAATTTTACAATTTAAGACTTGGTG-----GATTGATGG-----GTACAAGAAC      |   |   |   |   |   |   |   |   |   |   |   |   |   |   |   |   |   |   |   |   |   |   |   |   |   |   |   |
| 11_233   | CTACATAAATAGTTTAAAAA-CTATTGTA AAAAGCAATGTTTCACCAATG-----GATTGATGG-----GTACAAGAAC                                 |   |   |   |   |   |   |   |   |   |   |   |   |   |   |   |   |   |   |   |   |   |   |   |   |   |   |   |
| 11_277   | TTCC-TTA--TGATTGGGAGA-TTCTGGCAAAATCGTCTCT-CTCACCCTC-TCAATTTTACAATTTAAGACTTGGTG-----GATTGATGG-----GCACAAGAAC      |   |   |   |   |   |   |   |   |   |   |   |   |   |   |   |   |   |   |   |   |   |   |   |   |   |   |   |
| 11_424   | TTCC-TTA--TGATTGGGAGA-TTCTGGCAAAATCGTCTCT-CTCACCCTC-TCAATTTTACAATTTAAGACTTGGTG-----GATTGATGG-----GTACAAGAAC      |   |   |   |   |   |   |   |   |   |   |   |   |   |   |   |   |   |   |   |   |   |   |   |   |   |   |   |
| 11_456   | TTCC-TTA--TGATTGGGAGA-TTCTGGCAAAATCGTCTCT-CTCACCCTC-TCAATTTTACAATTTAAGACTTGGTG-----GATTGATGG-----GTACAAGAAC      |   |   |   |   |   |   |   |   |   |   |   |   |   |   |   |   |   |   |   |   |   |   |   |   |   |   |   |
| 12_216   | TTCC-TTA--TGATTGGGAGA-TTCTGGCAAAATCGTCTCT-CTCACCCTC-TCAATTTTACAATTTAAGACTTGGTG-----GATTGATGG-----GTACAAGAAC      |   |   |   |   |   |   |   |   |   |   |   |   |   |   |   |   |   |   |   |   |   |   |   |   |   |   |   |
| 12_419   | TTACATAAATAGTTTAAAAA-CTATTGTA AAAAGCAATGTTTCACCAATG-----GATTGATGG-----GTACAAGAAC                                 |   |   |   |   |   |   |   |   |   |   |   |   |   |   |   |   |   |   |   |   |   |   |   |   |   |   |   |
| 14_023   | TTCC-TTA--TGATTGGGAAA-TTCTGGCTAAATCTTCTCT-CTCACCCTC-TCACTATCTACAATTTAAACCTGGTG-----GATTGACGGA-----GTACAAGAAC     |   |   |   |   |   |   |   |   |   |   |   |   |   |   |   |   |   |   |   |   |   |   |   |   |   |   |   |
| 16_010   | -----GATTGATGG-----GTACAAGAAC                                                                                    |   |   |   |   |   |   |   |   |   |   |   |   |   |   |   |   |   |   |   |   |   |   |   |   |   |   |   |
| 17_029   | CTCC-GTG--TGATTGGGAGA-TTTTAAAGAAAGTAACT-TTCGCCCTC-CCAATTTCTTCACTTTAAGACTTGGTG-----GACCGACGAG-----GCTCAA AATC     |   |   |   |   |   |   |   |   |   |   |   |   |   |   |   |   |   |   |   |   |   |   |   |   |   |   |   |
| 19_157   | TTCC-TTA--TGATTGGGAGA-TTCTGGCAAAATCGTCTCT-CTCACCCTC-T-ATCTTTTACAATTTAAGACTTGGTG-----GATTGATGG-----GTACAAGAAC     |   |   |   |   |   |   |   |   |   |   |   |   |   |   |   |   |   |   |   |   |   |   |   |   |   |   |   |
| 19_238   | TTCC-TTA--TGATTGGGAGA-TTCTGGCAAAATCGTCTCT-CTCACCCTC-TCAATTTTACAATTTAAGACTTGGTG-----GATTGATGG-----GCACAAGAAC      |   |   |   |   |   |   |   |   |   |   |   |   |   |   |   |   |   |   |   |   |   |   |   |   |   |   |   |
| 19_352   | TTCC-TTA--TGATTGGGAGA-TTCTGGCAAAATCGTCTCT-CTCACCCTC-TCAATTTTACAATTTAAGACTTGGTG-----GATTGATGG-----GTACAAGAAC      |   |   |   |   |   |   |   |   |   |   |   |   |   |   |   |   |   |   |   |   |   |   |   |   |   |   |   |
| 19_407   | TTCT-TTA--TGATTGGGAGA-TTCTGGCAAAATGATCGCT-CTCACCCTC-TCAATGTTTACAATTTAAGACTTGGTGAAGACTTGGTGATGATGG-----GCACAAGAAC |   |   |   |   |   |   |   |   |   |   |   |   |   |   |   |   |   |   |   |   |   |   |   |   |   |   |   |
| 19_639   | CTACATAAATAGTTTAAAAA-CTACTTAAAAA-GGACACTTTCACCCACT-----GATTGATGG-----GTACAAGAAC                                  |   |   |   |   |   |   |   |   |   |   |   |   |   |   |   |   |   |   |   |   |   |   |   |   |   |   |   |
| 1_059    | TTCC-CTA--TGATTGGGAAA-CGTGGCTAAATCTTCCCT-TTCACCCTC-TCACTTCTACAATTTAAACCTGGTG-----GATTGATGGA-----GTACAAGAAC       |   |   |   |   |   |   |   |   |   |   |   |   |   |   |   |   |   |   |   |   |   |   |   |   |   |   |   |
| 1_061    | TTCC-CTA--TGATTGGGAAA-TGTGGCTAAATCTTCCCT-TTCACCCTC-TCACTTCTACAATTTAAACCTGGTG-----GATTGATGGA-----GTACAAGAAC       |   |   |   |   |   |   |   |   |   |   |   |   |   |   |   |   |   |   |   |   |   |   |   |   |   |   |   |
| 1_259    | TTCC-TTA--TGATTGGGAGA-TTCTGGCAAAATCGTCTCT-CTCACCCTC-TCAATTTTACAATTTAAGACTTGGTG-----GATTGATGG-----GTACAAGAAC      |   |   |   |   |   |   |   |   |   |   |   |   |   |   |   |   |   |   |   |   |   |   |   |   |   |   |   |
| 1_504    | TTCC-TTA--TGATTGGGAGA-TTCTGGCAAAATCGTCTCT-CTCACCCTC-TCAATTTTACAATTTAAGACTTGGTG-----GATTGATGG-----GTACAAGAAC      |   |   |   |   |   |   |   |   |   |   |   |   |   |   |   |   |   |   |   |   |   |   |   |   |   |   |   |
| 1_555    | TTCC-TTA--TGATTGGGAGA-TTCTGGCAAAATCGTCTCT-CTCACCCTC-TCAATTTTACAATTTAAGACTTGGTG-----AATTGATGG-----GCACAAGAAC      |   |   |   |   |   |   |   |   |   |   |   |   |   |   |   |   |   |   |   |   |   |   |   |   |   |   |   |
| 20_078   | TTCC-TTA--TGACTGGGAAA-TTCTGGCAAAATCATCACT-CTCACCCTC-TCAATTTTACAATTTAAGACTTGGTG-----GATTGATGG-----GTACAAGAAC      |   |   |   |   |   |   |   |   |   |   |   |   |   |   |   |   |   |   |   |   |   |   |   |   |   |   |   |
| 21_019   | TTCC-TTA--TGATTAGGAGA-TTCTGGCAAAATCGTCTCT-CTCACCCTC-TCAATTTTACAATTTAAGACTTAGTA-----GATTGATGAG-----GTACAAGAAC     |   |   |   |   |   |   |   |   |   |   |   |   |   |   |   |   |   |   |   |   |   |   |   |   |   |   |   |
| 22_012   | TTCC-TTA--TGATTGGGAGA-TTCTGGCAAAATCGTCTCT-CTCACCCTC-TCAATTTTACAATTTAAGACTTGGTG-----GATTGATGG-----GTACAAGAAC      |   |   |   |   |   |   |   |   |   |   |   |   |   |   |   |   |   |   |   |   |   |   |   |   |   |   |   |
| 22_041   | CTCC-TTA--TGACTGGGAAA-TTCTGGCAAAATCTTCCCT-TTCACTCTC-TCACTATCTACAGTTTAAACCTGGTG-----GATTGATGGA-----GTACAAGAAC     |   |   |   |   |   |   |   |   |   |   |   |   |   |   |   |   |   |   |   |   |   |   |   |   |   |   |   |
| 2_Tan    | TTCC-TTA--TGATTGGGAGA-TTCTGGCAAAATCGTCTCT-CTCACCCTC-TCAATTTTACAATTTAAGACTTGGTG-----GATTGATGG-----GTACAAGAAC      |   |   |   |   |   |   |   |   |   |   |   |   |   |   |   |   |   |   |   |   |   |   |   |   |   |   |   |
| 3_014    | TTCC-TTA--TGATTGGGAGA-TTCTGGCAAAATCGTCTCT-CTCACCCTC-TCAATTTTACAATTTAAGACTTGGTG-----GATTAATGG-----GCACAAGAAC      |   |   |   |   |   |   |   |   |   |   |   |   |   |   |   |   |   |   |   |   |   |   |   |   |   |   |   |
| 3_209    | TTCC-TTA--TGATTGGGAGA-TTCTGGCAAAATCGTCTCT-CTCACCCTC-TCAATTTTACAATTTAAGACTTGGTG-----GATTGATGG-----GTACAAGAAC      |   |   |   |   |   |   |   |   |   |   |   |   |   |   |   |   |   |   |   |   |   |   |   |   |   |   |   |
| 3_294    | CTCC-TTA--TGACTGGGAAA-GTTGGGCAAAATCTTCCCT-TTCACTCTC-TCACTATCTACAGTTTAAACCTGGTG-----GATTGATGGA-----GTACAAGAAC     |   |   |   |   |   |   |   |   |   |   |   |   |   |   |   |   |   |   |   |   |   |   |   |   |   |   |   |
| 3_354    | TTCC-TTA--TGATTGGGAGA-TTCTGGCAAAATCGTCTCT-CTCACCCTC-TCAATTTTACAATTTAAGACTTGGTG-----GATTGATGG-----GTACAAGAAC      |   |   |   |   |   |   |   |   |   |   |   |   |   |   |   |   |   |   |   |   |   |   |   |   |   |   |   |
| 3_385    | TTCC-TTA--TGATTGGGAGA-TTCTGGCAAAATCGTCTCT-CTCACCCTC-TCAATTTTACAATTTAAGACTTGGTG-----GATTGATAGA-----GTACAAGAAC     |   |   |   |   |   |   |   |   |   |   |   |   |   |   |   |   |   |   |   |   |   |   |   |   |   |   |   |
| 3_496    | TTCC-TTA--TGATTGGGAGA-TTCTGGCAAAATCGTCTCT-CTCACCCTC-TCAATTTTACAATTTAAGACTTGGTG-----GATTGATGG-----GTACAAGAAC      |   |   |   |   |   |   |   |   |   |   |   |   |   |   |   |   |   |   |   |   |   |   |   |   |   |   |   |
| 3_610    | TTCC-TTA--TGATTGGGAGA-TTCTGGCAAAATCGTCTCT-CTCACCCTC-TCAATTTTACAATTTAAGACTTGGTG-----GATTGATGG-----GTACAAGAAC      |   |   |   |   |   |   |   |   |   |   |   |   |   |   |   |   |   |   |   |   |   |   |   |   |   |   |   |
| 4_008    | TTCC-TTA--TGATTGGGAGA-TTCTGGCAAAATCGTCTCT-CTCACCCTC-TCA ---TTTACAGTTTAAACCTGGTG-----GATTGATGGAATGGAGTACAAGAAC    |   |   |   |   |   |   |   |   |   |   |   |   |   |   |   |   |   |   |   |   |   |   |   |   |   |   |   |
| 4_032    | TTCC-TTA--TAATTGGGAAA-TTCTGGCAAAATCTTCCCT-TTCACCCTC-TCACTATCTACAGTTTAAACCTGGTG-----GATTGATGG-----GTACAAGAAC      |   |   |   |   |   |   |   |   |   |   |   |   |   |   |   |   |   |   |   |   |   |   |   |   |   |   |   |
| 4_052    | TTTC-TTA--TGATTGGGAAA-TTCTGGCTAAATCTTCCCT-TTCACCCTC-TCACTATCTACAGTTTAAACCTGGTG-----GAATGATGG-----GTACAAGAAC      |   |   |   |   |   |   |   |   |   |   |   |   |   |   |   |   |   |   |   |   |   |   |   |   |   |   |   |
| 4_068    | TTCC-TTA--TAATTGGGAAA-TTCTGGCAAAATCTTCCCT-TTCACCCTC-TCACTATCTACAGTTTAAACCTGGTG-----GATTGATGG-----GTACAAGAAC      |   |   |   |   |   |   |   |   |   |   |   |   |   |   |   |   |   |   |   |   |   |   |   |   |   |   |   |
| 4_716    | TTCC-TTA--TGATTGGGAGA-TTCTGGCAAAATCGTCTCT-CTTACCCTC-TCAATTTTACAATTTAAGACTTGGTG-----GATTGATGG-----GTACAAGAAC      |   |   |   |   |   |   |   |   |   |   |   |   |   |   |   |   |   |   |   |   |   |   |   |   |   |   |   |
| 4_742    | TTCC-TTA--TGATTGGGAGA-TTCTGGCAAAATCGTCTT-TTCACCCTC-TCAATTTGACAATTTAAGACTTGGTG-----GATTGATAG-----ACACAAGAAC       |   |   |   |   |   |   |   |   |   |   |   |   |   |   |   |   |   |   |   |   |   |   |   |   |   |   |   |
| 5_147    | TTCC-TTA--TGATTGGGAGA-TTCTGGCAAAATCGTCTCT-CTCACCCTC-TCAATTTTACAATTTAAGACTTGGTG-----GATTGATGG-----GTACAAGAAC      |   |   |   |   |   |   |   |   |   |   |   |   |   |   |   |   |   |   |   |   |   |   |   |   |   |   |   |
| 5_259    | TTCC-TTA--TGATTGGGAGA-TTCTGGCAAAATCGTCTC-CTCACCCTC-TCAATTTTACAATTTAAGACTTGGTG-----GATTGATGG-----TACAAGAAC        |   |   |   |   |   |   |   |   |   |   |   |   |   |   |   |   |   |   |   |   |   |   |   |   |   |   |   |
| 5_535    | TTCC-TTA--TGATTGGGAAA-TTCTGGCTAAGTCTTCCCT-TTCACCCTC-TCACTTCTACAGTTTAAACCTGGTG-----GATTGATGGA-----GTACAAGAAC      |   |   |   |   |   |   |   |   |   |   |   |   |   |   |   |   |   |   |   |   |   |   |   |   |   |   |   |
| 5_544    | TTCC-TTA--TGATTGGGAGA-TTCTGGCAAAATCGTCTCT-CTCACCCTC-TCAATTTTACAATTTAAGACTTGGTG-----GATTGATGG-----GTACAAGAAC      |   |   |   |   |   |   |   |   |   |   |   |   |   |   |   |   |   |   |   |   |   |   |   |   |   |   |   |
| 6_098    | TTCC-TTA--TGATTGGGAGA-TTCTGGCAAAATCATCACT-CTCACCCTC-TCAATTTTACAATTTAAGACTTGGTG-----AATTGATGG-----GCACAAGAAC      |   |   |   |   |   |   |   |   |   |   |   |   |   |   |   |   |   |   |   |   |   |   |   |   |   |   |   |
| 6_178    | TTCC-TTA--TGACTGGGAAA-TTCTGGCTAAATCTTCCCT-TTCACCCTC-TCACTTCTACAGTTTAAACCTGGTG-----GATCGATGGA-----GTACAAGAAC      |   |   |   |   |   |   |   |   |   |   |   |   |   |   |   |   |   |   |   |   |   |   |   |   |   |   |   |
| 6_240    | CTACATAAATAGTTTAAAAA-CTATTTAAAAAGCAATGTTTCACCACT-----GATTGATGG-----GTACAAGAAC                                    |   |   |   |   |   |   |   |   |   |   |   |   |   |   |   |   |   |   |   |   |   |   |   |   |   |   |   |
| 6_324    | TTCC-TTA--TGATTGGGAGA-TTCTGGCAAAATCGTCTCT-CTCACCCTC-TCAATTTTACAATTTAAGACTTGGTG-----GATTGATGG-----GTACAAGAAC      |   |   |   |   |   |   |   |   |   |   |   |   |   |   |   |   |   |   |   |   |   |   |   |   |   |   |   |
| 7_345    | TTCC-TTA--TGATTGGGAGA-TTCTGGCAAAATCGTCTCT-CTCACCCTC-TCAATTTTACAATTTAAGACTTGGTG-----GATTGATGG-----GTTCAAGAAC      |   |   |   |   |   |   |   |   |   |   |   |   |   |   |   |   |   |   |   |   |   |   |   |   |   |   |   |
| 7_450    | TTCC-TTA--TGATTGGGAGA-TTCTGGCAAAATGTCCTCT-CTCACCCTC-TCAATTTTACAATTTAAGACTTGGTG-----GATTGATGG-----GCACAAGAAC      |   |   |   |   |   |   |   |   |   |   |   |   |   |   |   |   |   |   |   |   |   |   |   |   |   |   |   |
| 8_047    | TTTC-TTA--TGATTGGGAAA-TTCTGGCTAAATCTTCCCT-TTCACCCTC-TCACTATCTCCAGTTTAAACCTGGTG-----GATTGATGG-----GTACAAGAAC      |   |   |   |   |   |   |   |   |   |   |   |   |   |   |   |   |   |   |   |   |   |   |   |   |   |   |   |
| 8_074    | TTTC-TTA--TGATTGGGAAA-TTCTGGCTATATCTTCCCT-TTCACCCTC-TCACTATCTCCAGTTTAAACCTGGTG-----GATTGATGG-----GTACAAGAAC      |   |   |   |   |   |   |   |   |   |   |   |   |   |   |   |   |   |   |   |   |   |   |   |   |   |   |   |
| 8_094    | TTTC-TTA--TGATTGGGAAA-TTCTGGCTATATCTTCCCT-TTCACCCTC-TCACTATCTCCAGTTTAAACCTGGTG-----GATTGATGG-----GTACAAGAAC      |   |   |   |   |   |   |   |   |   |   |   |   |   |   |   |   |   |   |   |   |   |   |   |   |   |   |   |
| 8_121    | CCCC-GCA--CGATTGGGAGA-TTCTAGCAAAGCTACTCT-TTCGCCCTC-CCAATTTCTCAATTTAAAGTGGTG-----GACCGATGAG-----GCTCAA AATC       |   |   |   |   |   |   |   |   |   |   |   |   |   |   |   |   |   |   |   |   |   |   |   |   |   |   |   |
| 8_235    | CTGCATAAATAGTTTAAAAA-CTATTTAAAAAGCAATGTTTCACCACT-----GATTGATGG-----GTACAAGAAC                                    |   |   |   |   |   |   |   |   |   |   |   |   |   |   |   |   |   |   |   |   |   |   |   |   |   |   |   |
| 8_525    | TTCC-TTA--CAATTGGGAGA-TTCTGGCAAAATCGTCTCT-CTCACCCTC-TCAATTTTACAATTTAAGACTTGGTG-----GATTGATGG-----GTACAAGAAC      |   |   |   |   |   |   |   |   |   |   |   |   |   |   |   |   |   |   |   |   |   |   |   |   |   |   |   |
| 8_559    | TTCC-TTA--TGATTGGGAAA-TTCTACCTAAATCTTCCCT-TTCACCCTC-TCACTATCTACAGTTTAAACCTGGTG-----GATTGATGGA-----GTACAAGAAC     |   |   |   |   |   |   |   |   |   |   |   |   |   |   |   |   |   |   |   |   |   |   |   |   |   |   |   |
| 9_307    | CTACATAAATAGTTTAAAAA-CTATTTAAAAAGCAATGTTTCACCACT-----GATTGATGG-----GTACAAGAAC                                    |   |   |   |   |   |   |   |   |   |   |   |   |   |   |   |   |   |   |   |   |   |   |   |   |   |   |   |
| 9_340    | TTCC-TTA--TGATTGGGAGA-TTCTGGCAAAATCATCACT-CTCACCCTC-TCAATTTTACAATTTAAGACTTGGTG-----GATTGATGG-----ACACAAGAAC      |   |   |   |   |   |   |   |   |   |   |   |   |   |   |   |   |   |   |   |   |   |   |   |   |   |   |   |
| HML2_Rep | TTCC-TTA--TGATTGGGAGA-TTCTGGCAAAATCGTCTCT-CTCACCCTC-TCAATTTTACAATTTAAGACTTGGTG-----GATTGATGG-----GTACAAGAAC      |   |   |   |   |   |   |   |   |   |   |   |   |   |   |   |   |   |   |   |   |   |   |   |   |   |   |   |
| K113     | TTCC-TTA--TGATTGGGAGA-TTCTGGCAAAATCGTCTCT-CTCACCCTC-TCAATTTTACAATTTAAGACTTGGTG-----GATTGATGG-----GTACAAGAAC      |   |   |   |   |   |   |   |   |   |   |   |   |   |   |   |   |   |   |   |   |   |   |   |   |   |   |   |
| K115     | TTCC-TTA--TGATTGGGAGA-TTCTGGCAAAATCGTCTCT-CTCACCCTC-TCAATTTTACAATTTAAGACTTGGTG-----GATTGATGG-----GTACAAGAAC      |   |   |   |   |   |   |   |   |   |   |   |   |   |   |   |   |   |   |   |   |   |   |   |   |   |   |   |
| X_540    | CTACATAAATAGTTTAAAAA-CTATTTAAAAAGCAATGTTTCACCACT-----GATTGATGG-----GTACAAGAAC                                    |   |   |   |   |   |   |   |   |   |   |   |   |   |   |   |   |   |   |   |   |   |   |   |   |   |   |   |
| Y_026    | TTCC-TTA--TGATTGGGAAA-TTCTGGCTAAATCTTCCCT-TTCACCCTC-TCAATTTCTACAGTTTAAACCTGGTA-----GATTGATGGA-----GTACAAGAAT     |   |   |   |   |   |   |   |   |   |   |   |   |   |   |   |   |   |   |   |   |   |   |   |   |   |   |   |
| 93       | TTCC-TTA--TGATTAGGAGA-TTCTGGCAAAATCGTCTCT-CTCACCCTC-TCAATTTTACAATTTAAGACTTAGTA-----GATTGATGAG-----GTACAAGAAC     |   |   |   |   |   |   |   |   |   |   |   |   |   |   |   |   |   |   |   |   |   |   |   |   |   |   |   |

|          |   |
|----------|---|
| 10_019   | A |
| 10_310   | A |
| 11_233   | - |
| 11_277   | A |
| 11_424   | A |
| 11_456   | A |
| 12_216   | A |
| 12_419   | - |
| 14_023   | A |
| 16_010   | - |
| 17_029   | A |
| 19_157   | A |
| 19_238   | A |
| 19_352   | A |
| 19_407   | A |
| 19_639   | - |
| 1_059    | A |
| 1_061    | A |
| 1_259    | A |
| 1_504    | A |
| 1_555    | A |
| 20_078   | A |
| 21_019   | G |
| 22_012   | A |
| 22_041   | A |
| 2_Tan    | A |
| 3_014    | A |
| 3_209    | A |
| 3_294    | A |
| 3_354    | A |
| 3_385    | A |
| 3_496    | A |
| 3_610    | A |
| 4_008    | A |
| 4_032    | A |
| 4_052    | A |
| 4_068    | A |
| 4_716    | A |
| 4_742    | A |
| 5_147    | A |
| 5_259    | A |
| 5_535    | A |
| 5_544    | A |
| 6_098    | A |
| 6_178    | A |
| 6_240    | - |
| 6_324    | A |
| 7_345    | A |
| 7_450    | A |
| 8_047    | A |
| 8_074    | A |
| 8_094    | A |
| 8_121    | A |
| 8_235    | - |
| 8_525    | A |
| 8_559    | A |
| 9_307    | - |
| 9_340    | A |
| HML2_Rep | A |
| K113     | A |
| K115     | A |
| X_540    | - |
| X_026    | A |
| 93       | G |

1 5 1 1 2 2 3 3 4 4 5 5 6 6 7 7 8 8 9 9 1 1 1 1  
0 0 5 0 5 0 5 0 5 0 5 0 5 0 5 0 5 0 5 0 0 5 0 5  
10\_019 AGGACC--AAGTCCCTTCCAGTAGGTCAGATGCCCGTAACATTACAACCTCAAACGCAGGTTAG-----  
10\_310 AGGGCC--AAGTCCCTTCCAGCAGGTCAGGTGCCCGTAACATTACAACCTCAAACGCAGGTTAA-----  
11\_233 -----  
11\_277 ATGGCC--AAGTCCCTTCCAGCGGTTTCAGATGCCTGTAACATTACAACCTCAAATGCAGGTTAGACAAGTACAACCCCAAGAGAATATCAAAATAGAGAG-----TCTCT  
11\_424 AGGCAC--AAGTCCCTTCCAGCAGGTCAGGTGCCCGTAAGATTACAACCTCAAACGCAGGTTAA-----  
11\_456 AGGGCC--AAGTCCCTTCCAGCAGGTCAGGTGCCCGTAACATTACAACCTCAAACGCAGGTTAG-----  
12\_216 AGGCAC--AAGTCCCTTCCAGCAGGTCAGGTGCCCGTAACATTACAACCTCAAACGCAGGTTAA-----  
12\_419 -----  
14\_023 ATGGCCAAACAACCTCTCTCCCACGGTTTCAGATGCCTGTGACATTACAACCTCAAA-----  
16\_010 ATGGC---CAACTCCCTCCCGGTTCAGATACCTGTAACATTACAACCTCAAATGCAGGTTAGACAAGTACAACCCCAAGAGAATATCAAAATAGAAAAGGATAG-----TCTCT  
17\_029 -----  
19\_157 ATGGCC--AAGTCCCTTCCAGCAGTTCAGATGCCTGTAACATTACAACCTCAAATGCAGGTTAGACAAGTACAACCTGAAGAGAATAACAAATAGAGAAAGATAGAGTATCT  
19\_238 AGGGCC--AAGTCCCTTCCAGCAGGTCAGATGCCCGTAATATTACAACCTCAAACGCAGTTAG-----  
19\_352 AGGCAC--AAGTCCCTTCCAGCAGGTCAGGTGCCCGTAACATTACAACCTCAAACGCAGGTTAA-----  
19\_407 ATGGCC--AAGTCCCTTCCAGCAGTTCAGATGCCTGTAACATTACAACCTCAAATGCAGGTTAGACAAGTACAACCCCAAGAGAATATCAAAATAGGAAAAGATAGAGTCTCT  
19\_639 -----  
1\_059 ATGGCCATCAACTCCCTCCAGTGTTCAGATGCCTGTAACATTACAACCTCAAATGCAGGTTAGACAAGTACAACCCCAAGAGAATATCAAGTAGAAAAGGATAGAGTCTCT  
1\_061 ATGGCCATCAACTCCCTCCAGCGGTTTCAGATGCCTGTAACATTACAACCTCAAATGCAGGTTAGACAAGTACAACCCCAAGAGAATATCAATGAGAAAAGGATAGAGTCTCT  
1\_259 AGGCAC--AAGTCCCTTCCAGCAGGTCAGGTGCCCGTAAGATTACAACCTCAAACGCAGGTTAA-----  
1\_504 AGGCAC--AAGTCCCTTCCAGCAGGTCAGGTGCCCGTAACATTACAACCTCAAAGCAGGTTAA-----  
1\_555 AGGGCC--AAGTCCCTTTCAGCAGGTCAGGTGCCCGTAACATTACAACCTCAAACGCAGGTTAG-----  
20\_078 ATGGCC--AAGTCCCTTCCAGCAGGTCAGATGCCCGTAACATTACAACCTCAAATGCAGGTTAGACAAGTACAACCCCAAGAGAATATCAGATAGAAAAGGATAG-----TCTCT  
21\_019 AGGGCC--AAGTCCCTTCCAGCAGTTCAGATGCCTGTAACATTACAACCTCAAACGCAGGTTAA-----  
22\_012 AGGCAC--AAGTCCCTTCCAGCAGGTCAGGTGCCCGTAACATTACAACCTCAAAGCAGGTTAA-----  
22\_041 ATGCCATCAACTCCCTCCCGCGGTTTCAGATGCCTGTAACATTACAACCTCAAACGCAGGTTAGACAAGCACAACCCCAAGAGAATAATCAAGTAGAAAAGGACAGAGTCTCT  
2\_Tan AGGCAC--AAGTCCCTTCCAGCAGGTCAGGTGCCCGTAACATTACAACCTCAAAGCAGGTTAA-----  
3\_014 AGGCAC--AAGTCCCTTCCAGCAGGTCAGATGCCCGTAACATTACAACCTCAAACACAGGTTAG-----  
3\_209 ATGGCCACCACTCCCTCTCCCACGGTTTCAGATGCCTGTGACATTACAACCTCAAATCTCAAA-----  
3\_294 AGGGCC--AAGTCCCTTCCAGCAGGTCAGGTGCCCGTAACATTACAACCTCAAACGCAGGTTAA-----  
3\_354 AGGCAC--AAGTCCCTTCCAGCAGGTCAGGTGCCCGTAACATTACAACCTCAAAGCAGGTTAA-----  
3\_385 AGGCAC--AAGTCCCTTCCAGCAGGTCAGGTGCCCGTAACATTACAACCTCAAATGCAGGTTAA-----  
3\_496 AGGGCC--AAGTCCCTTCCAGCAGGTCAGGTGCCCGTAACATTACAACCTCAAAGCAGGTTAA-----  
3\_610 AGGCAC--AAGTCCCTTCCAGCAGGTCAGGTGCCCGTAACATTACAACCTCAAACGCAGGTTAA-----  
4\_008 -----  
4\_032 ATGGCCACCAACCCCTCTCCCACGGTTTCAGATGCCTGTGATGCACAACTCAAA-----  
4\_052 ATGGCCACCAACTCCTCTCCCACGGTTTCAGATGCCTGTGATGCACAACTCAAA-----  
4\_068 ATGGCCACCAACCCCTCTCCCACGGTTTCAGATGCCTGTGATGCACAACTCAAA-----  
4\_716 AGGGCC--AAGTCCCTTCCAGCAGGTCAGGTGCCCGTAACATTACAACCTCAAAGCAGGTTAA-----  
4\_742 AGAGCC--AAGTCCCTTTCAGCAGGTCAGATGCCCGTAACATTACAACCTCAAACGCAGGTTAG-----  
5\_147 AGGCAC--AAGTCCCTTCCAGCAGGTCAGGTGCCCGTAAGATTACAACCTCAAAGCAGGTTAA-----  
5\_259 AGCACC--AAGTCCCTTCCAGCAGGTCAGATGCCTGGAACATTACAGTCTCAAATGCAGGTTAG-----  
5\_535 ACGGCCATCAACTCCCTCCCTCCCGGTTTCAGATGCCTGTGACATTACAACCTCAAATGCAGGTTAGACAAGTACAACCTGCAAGAGAATATCAAGTAGAAAAGGATAGAGTCTCT  
5\_544 AGGCAC--AAGTCCCTTCCAGCAGGTCAGGTGCCCGTAAGATTACAACCTCAAAGCAGGTTAA-----  
6\_098 ATGGCC--AAGTCCCTTCCAGCAGTTCAGATGCCTGTAACATTACAACCTCAAATGCAGGTTAGACAAGTACAACCCCAAGAGAATATCAAAATAGAAAAGGATAGAGTCTCT  
6\_178 ATGGCCATCAA---CTCCTCCCGTGTTCAGATACCTGTAACATTACAACCTCAAAGCAGGTTAGACAAGTACAACCCCAAGAGAATATCAAGTAGAAAAGGATAGAGTCTCT  
6\_240 -----  
6\_324 AGGCAC--AAGTCCCTTCCAGCAGGTCAGGTGCCCGTAACATTACAACCTCAAAGCAGGTTAA-----  
7\_345 AGGCAC--AAGTCCCTTCCAGCAGGTCAGGTGCCCGTAACATTACAACCTCAAACGCAGGTTAA-----  
7\_450 AGGGCC--AAGTCCCTTCCAGCAGTTCAGATGCCTGTAACATTACAACCTCAAATGCAGGTTAGACAAGTACAACCCCAAGAGAATATCAAAATAGAGAAAAGATAGAGTCTCT  
8\_047 ATGGCCACCAACTCCTCTCCCACGGTTTCAGATGCCTGTGATGCACAACTCAAA-----  
8\_074 ATGGCCACCAACTCCTCTCCCACGGTTTCAGATGCCTGTGATGCACAACTCAAA-----  
8\_094 ATGGCCACCAACTCCTCTCCCACGGTTTCAGATGCCTGTGATGCACAACTCAAA-----  
8\_121 -----  
8\_235 -----  
8\_525 AGGCAC--AAGTCCCTTCCAGCAGGTCAGGTGCCCGTAACATTACAACCTCAAAGCAGGTTAA-----  
8\_559 ATGGCCACCAACTCCTCTCCTCTGTTTCAGATGCCTGTGACATTACAACCTCAAA-----  
9\_307 -----  
9\_340 ATGGCCATCAACTCCCTCCCGCGGTTTCAGATGCCTGTAACATTACAACCTCAAATGCAGGTTAGACAAGTACAACCCCAAGAGAATATCAAAATAGAAAAGGAAAGAGTCTCT  
HML2\_Rep AGGCAC--AAGTCCCTTCCAGCAGGTCAGGTGCCCGTAACATTACAACCTCAAAGCAGGTTAA-----  
K113 AGGCAC--AAGTCCCTTCCAGCAGGTCAGGTGCCCGTAACATTACAACCTCAAAGCAGGTTAA-----  
K115 AGGCAC--AAGTCCCTTCCAGCAGGTCAGGTGCCCGTAACATTACAACCTCAAAGCAGGTTAA-----  
X\_540 -----  
Y\_026 ATGGCCACCAACTCCTCTCCCACGGTTTCAGATGCCTGTGACATTACAACCTCAAA-----  
94 AGGGCC--AAGTCCCTTCCAGCAGGTCAGGTGCCCGTAACATTACAACCTCAAACGCAGGTTAG-----

|          | 1                                                                                                                 | 1 | 1 | 1 | 1 | 1 | 1 | 1 | 1 | 1 | 1 | 1 | 1 | 1 | 1 | 1 | 2 | 2 | 2 | 2 | 2 | 2 | 2 |
|----------|-------------------------------------------------------------------------------------------------------------------|---|---|---|---|---|---|---|---|---|---|---|---|---|---|---|---|---|---|---|---|---|---|
|          | 2                                                                                                                 | 2 | 3 | 3 | 4 | 4 | 5 | 5 | 6 | 6 | 7 | 7 | 8 | 8 | 9 | 9 | 0 | 0 | 1 | 1 | 2 | 2 | 3 |
|          | 0                                                                                                                 | 5 | 0 | 5 | 0 | 5 | 0 | 5 | 0 | 5 | 0 | 5 | 0 | 5 | 0 | 5 | 0 | 5 | 0 | 5 | 0 | 5 | 0 |
| 10_019   | -----AGAAAATAAGACCCAACACCAGTAGCTTATCAATACTGGCCAGCGCAACTTCAGTATCGGCCAC                                             |   |   |   |   |   |   |   |   |   |   |   |   |   |   |   |   |   |   |   |   |   |   |
| 10_310   | -----AGAAAATAAGACCCAACGCCAGTAGCTTATCAATACTGGCCAGCGCAACTTCAGTATCGGCCAC                                             |   |   |   |   |   |   |   |   |   |   |   |   |   |   |   |   |   |   |   |   |   |   |
| 11_233   | -----AGAAAATAAGACCCAACGCCAGTAGCTTATCAATACTGGCCAGCGCAACTTCAGTATCGGCCAC                                             |   |   |   |   |   |   |   |   |   |   |   |   |   |   |   |   |   |   |   |   |   |   |
| 11_277   | GTCATGGCAACGCCAATCCAAATACAGTATCCACAATATCAGCCGGTAGAAAATAAGACCCAACGCCAGTAGCTTATCAATACTGGCCAGCGCAACTTCAGTATCGGCCAC   |   |   |   |   |   |   |   |   |   |   |   |   |   |   |   |   |   |   |   |   |   |   |
| 11_424   | -----AGAAAATAAGACCCAACGCCAGTAGCTTATCAATACTGGCCAGCGCAACTTCAGTATCGGCCAC                                             |   |   |   |   |   |   |   |   |   |   |   |   |   |   |   |   |   |   |   |   |   |   |
| 11_456   | -----AGAAAATAAGACCCAACACCAGTAGCTTATCAATACTGGCCAGCGCAACTTCAGTATCGGCCAC                                             |   |   |   |   |   |   |   |   |   |   |   |   |   |   |   |   |   |   |   |   |   |   |
| 12_216   | -----AGAAAATAAGACCCAACACCAGTAGCTTATCAATACTGGCCAGCGCAACTTCAGTATCGGCCAC                                             |   |   |   |   |   |   |   |   |   |   |   |   |   |   |   |   |   |   |   |   |   |   |
| 12_419   | -----AGAAAATAAGACCCAACACCAGTAGCTTATCAATACTGGCCAGCGCAACTTCAGTATCGGCCAC                                             |   |   |   |   |   |   |   |   |   |   |   |   |   |   |   |   |   |   |   |   |   |   |
| 14_023   | -----TGCCAATCCAGACACAGTATCCACAATATCAGCCGGTAGAAAATAAAACCCAACCATCAGTAGTATTATGAACACAGCCATCAGCCGAATTCAGTATCGGCCGT     |   |   |   |   |   |   |   |   |   |   |   |   |   |   |   |   |   |   |   |   |   |   |
| 16_010   | ATCTCGGCAATGCCAATCCAGATACAGTATCCACAATATCAGCCAGTAGAAAATAAAACCCAACGCCATTAGCTTATCAATACTGGCCAGCGCAACTTCAGTATCGGCCAC   |   |   |   |   |   |   |   |   |   |   |   |   |   |   |   |   |   |   |   |   |   |   |
| 17_029   | -----AGAAAATAAGACCCAACGCCAGTAGCTTATCAATACTGGCCAGCGCAACTTCAGTATCGGCCAC                                             |   |   |   |   |   |   |   |   |   |   |   |   |   |   |   |   |   |   |   |   |   |   |
| 19_157   | GTCACAGCAATGCCAATCCAAATACAGTATCCACAATATCAGCTGGTAGAAAATAAGACCCAACGCCAGTAGCTTATCAATACTGGCCAGCGCAACTTCAGTATCGGCCAC   |   |   |   |   |   |   |   |   |   |   |   |   |   |   |   |   |   |   |   |   |   |   |
| 19_238   | -----AGAAAATAAGACCCAACGCCAGTAGCTTATCAATACTGGCCAGCGCAACTTCAGTATCGGCCAC                                             |   |   |   |   |   |   |   |   |   |   |   |   |   |   |   |   |   |   |   |   |   |   |
| 19_352   | -----AGAAAATAAGACCCAACGCCAGTAGCTTATCAATACTGGCCAGCGCAACTTCAGTATCGGCCAC                                             |   |   |   |   |   |   |   |   |   |   |   |   |   |   |   |   |   |   |   |   |   |   |
| 19_407   | GTCACGGCAATGCCAATCCAAATACAGTATCCACAATATCAGCCGGTAGAAAATAAGACCCAACGCCAGTAGCTTATCAATACTGGCCAGCGCAACTTCAGTATCGGCCAC   |   |   |   |   |   |   |   |   |   |   |   |   |   |   |   |   |   |   |   |   |   |   |
| 19_639   | -----AGAAAATAAGACCCAACGCCAGTAGCTTATCAATACTGGCCAGCGCAACTTCAGTATCGGCCAC                                             |   |   |   |   |   |   |   |   |   |   |   |   |   |   |   |   |   |   |   |   |   |   |
| 1_059    | ATCCCAGCAATGCCAATTCAGATACAGTATCCACAATATCAGCTGGTAGAAAATAAGACCCAACACCAGGTAGTATTATCAATACTGGCCAGCGCAACTTCAGTATCGGCCGT |   |   |   |   |   |   |   |   |   |   |   |   |   |   |   |   |   |   |   |   |   |   |
| 1_061    | ATCCCAGCAATGCCAATTCAGATACAGTATCCACAATATCAGCTGGTAGAAAATAAGACCCAACACCAGGTAGTATTATCAATACTGGCCAGCGCAACTTCAGTATCGGCCGT |   |   |   |   |   |   |   |   |   |   |   |   |   |   |   |   |   |   |   |   |   |   |
| 1_259    | -----AGAAAATAAGACCCAACGCCAGTAGCTTATCAATACTGGCCAGCGCAACTTCAGTATCGGCCAC                                             |   |   |   |   |   |   |   |   |   |   |   |   |   |   |   |   |   |   |   |   |   |   |
| 1_504    | -----AGAAAATAAGACCCAACGCCAGTAGCTTATCAATACTGGCCAGCGCAACTTCAGTATCGGCCAC                                             |   |   |   |   |   |   |   |   |   |   |   |   |   |   |   |   |   |   |   |   |   |   |
| 1_555    | -----AGAAAATAAGACCCAACGCCAGTAGCTTATCAATACTGGCCAGCGCAACTTCAGTATCGGCCAC                                             |   |   |   |   |   |   |   |   |   |   |   |   |   |   |   |   |   |   |   |   |   |   |
| 20_078   | ATCACAGCAATGCCAATCCAGATACAGTATCCACAATATCAGCTGGTAGAAAATAAGACCCAACGCCAGTAGCTTATCAATACTGGCCAGCGCAACTTCAGTATCGGCCAC   |   |   |   |   |   |   |   |   |   |   |   |   |   |   |   |   |   |   |   |   |   |   |
| 21_019   | -----AGAAAATAAGACCCAACGCCAGTAGCTTATCAATACTGGCCAGCGCAACTTCAGTATCGGCCAC                                             |   |   |   |   |   |   |   |   |   |   |   |   |   |   |   |   |   |   |   |   |   |   |
| 22_012   | -----AGAAAATAAGACCCAACGCCAGTAGCTTATCAATACTGGCCAGCGCAACTTCAGTATCGGCCAC                                             |   |   |   |   |   |   |   |   |   |   |   |   |   |   |   |   |   |   |   |   |   |   |
| 22_041   | ATCCCAGCAATGCCAATCCAGATACAGTATCCACAATATCAGCCGGTAGAAAATAAGACCCAACGCCAGTAGCTTATCAATACTGGCCAGCGCAACTTCAGTATCGGCCAC   |   |   |   |   |   |   |   |   |   |   |   |   |   |   |   |   |   |   |   |   |   |   |
| 2_Tan    | -----AGAAAATAAGACCCAACGCCAGTAGCTTATCAATACTGGCCAGCGCAACTTCAGTATCGGCCAC                                             |   |   |   |   |   |   |   |   |   |   |   |   |   |   |   |   |   |   |   |   |   |   |
| 3_014    | -----AGAAAATAAGACCCAACACCAGTAGCTTATCAATACTGGCCAGCGCAACTTCAGTATCGGCCAC                                             |   |   |   |   |   |   |   |   |   |   |   |   |   |   |   |   |   |   |   |   |   |   |
| 3_209    | -----TGCTAATCCAGGCACAGTATCCACAATAGCAGGCAGTAGAAAATAAGACCCAACCATCGGTAGTATTATCAACACCAAGCCGTCAGCCGATTCAGTATCGGCCAC    |   |   |   |   |   |   |   |   |   |   |   |   |   |   |   |   |   |   |   |   |   |   |
| 3_294    | -----AGAAAATAAGACCCAACGCCAGTAGCTTATCAATACTGGCCAGCGCAACTTCAGTATCGGCCAC                                             |   |   |   |   |   |   |   |   |   |   |   |   |   |   |   |   |   |   |   |   |   |   |
| 3_354    | -----AGAAAATAAGACCCAACGCCAGTAGCTTATCAATACTGGCCAGCGCAACTTCAGTATCGGCCAC                                             |   |   |   |   |   |   |   |   |   |   |   |   |   |   |   |   |   |   |   |   |   |   |
| 3_385    | -----AGAAAATAAGACCCAACGCCAGTAGCTTATCAATACTGGCCAGCGCAACTTCAGTATCGGCCAC                                             |   |   |   |   |   |   |   |   |   |   |   |   |   |   |   |   |   |   |   |   |   |   |
| 3_496    | -----AGAAAATAAGACCCAACGCCAGTAGCTTATCAATACTGGCCAGCGCAACTTCAGTATCGGCCAC                                             |   |   |   |   |   |   |   |   |   |   |   |   |   |   |   |   |   |   |   |   |   |   |
| 3_610    | -----AGAAAATAAGACCCAACGCCAGTAGCTTATCAATACTGGCCAGCGCAACTTCAGTATCGGCCAC                                             |   |   |   |   |   |   |   |   |   |   |   |   |   |   |   |   |   |   |   |   |   |   |
| 4_008    | -----AGAAAATAAGACCCAACGCCAGTAGCTTATCAATACTGGCCAGCGCAACTTCAGTATCGGCCAC                                             |   |   |   |   |   |   |   |   |   |   |   |   |   |   |   |   |   |   |   |   |   |   |
| 4_032    | -----TGCCAATCCAGGCACAGTATCCGCAATACCAGCCGGTAGAAAATAAAACCCAACCATCGGTAGTATTATCAACACCAAGCCGTCAGCCGATTCAGTATCGGCCGT    |   |   |   |   |   |   |   |   |   |   |   |   |   |   |   |   |   |   |   |   |   |   |
| 4_052    | -----TGCCAATCCAGGCACAGTATCCGCAATACCAGCCGGTAGAAAATAAAACCCAACCATCGGTAGTATTATCAACACCAAGCCGTCAGCCGATTCAGTATCGGCCGT    |   |   |   |   |   |   |   |   |   |   |   |   |   |   |   |   |   |   |   |   |   |   |
| 4_068    | -----TGCCAATCCAGGCACAGTATCCGCAATACCAGCCGGTAGAAAATAAAACCCAACCATCGGTAGTATTATCAACACCAAGCCGTCAGCCGATTCAGTATCGGCCGT    |   |   |   |   |   |   |   |   |   |   |   |   |   |   |   |   |   |   |   |   |   |   |
| 4_716    | -----AGAAAATAAGACCCAACGCCAGTAGCTTATCAATACTGGCCAGCGCAACTTCAGTATCGGCCAC                                             |   |   |   |   |   |   |   |   |   |   |   |   |   |   |   |   |   |   |   |   |   |   |
| 4_742    | -----AGAAAATAAGACCCAACACCAGTAGCTTATCAATACTGGCCAGCGCAACTTCAGTATCGGCCAC                                             |   |   |   |   |   |   |   |   |   |   |   |   |   |   |   |   |   |   |   |   |   |   |
| 5_147    | -----AGAAAATAAGACCCAACGCCAGTAGCTTATCAATACTGGCCAGCGCAACTTCAGTATCGGCCAC                                             |   |   |   |   |   |   |   |   |   |   |   |   |   |   |   |   |   |   |   |   |   |   |
| 5_259    | -----AGAAAATAAGACCCAACACCAGTAGCTTATCAATACTGGCCAGCGCAACTTCAGTATCGGCCAC                                             |   |   |   |   |   |   |   |   |   |   |   |   |   |   |   |   |   |   |   |   |   |   |
| 5_535    | ATCCCAGCAATGCCAATCCAGACACAGTATCCACAATATCAGCTGGTAGAAAATAAAACCCAACCATCGGTAGTATTATCAATACTGGCCAGCGCAACTTCAGTATCGGCCGT |   |   |   |   |   |   |   |   |   |   |   |   |   |   |   |   |   |   |   |   |   |   |
| 5_544    | -----AGAAAATAAGACCCAACGCCAGTAGCTTATCAATACTGGCCAGCGCAACTTCAGTATCGGCCAC                                             |   |   |   |   |   |   |   |   |   |   |   |   |   |   |   |   |   |   |   |   |   |   |
| 6_098    | GCCATGGCAATGCCAATCCAGATACAGTATCCACAATATCAGCAGGTAGAAAATAAGACCCAACGCCAGTAGCTTATCAATACTGGCCAGCGCAACTTCAGTATCGGCCAC   |   |   |   |   |   |   |   |   |   |   |   |   |   |   |   |   |   |   |   |   |   |   |
| 6_178    | ATCCCAGCAATGCCAATCCAGATACAGTATCCACAATATAAGCTGGTAGAAAATAAGACCCAACACCAGTAGTATTATCACTACTGGCCAGCGCAACTTCAGTATCGGCCAC  |   |   |   |   |   |   |   |   |   |   |   |   |   |   |   |   |   |   |   |   |   |   |
| 6_240    | -----AGAAAATAAGACCCAACGCCAGTAGCTTATCAATACTGGCCAGCGCAACTTCAGTATCGGCCAC                                             |   |   |   |   |   |   |   |   |   |   |   |   |   |   |   |   |   |   |   |   |   |   |
| 6_324    | -----AGAAAATAAGACCCAACGCCAGTAGCTTATCAATACTGGCCAGCGCAACTTCAGTATCGGCCAC                                             |   |   |   |   |   |   |   |   |   |   |   |   |   |   |   |   |   |   |   |   |   |   |
| 7_345    | -----AGAAAATAAGACCCAACGCCAGTAGCTTATCAATACTGGCCAGCGCAACTTCAGTATCGGCCAC                                             |   |   |   |   |   |   |   |   |   |   |   |   |   |   |   |   |   |   |   |   |   |   |
| 7_450    | GTCACGGCAATGCCAATCCAAATACAGTATCCACAATATCAGCCGGTAGAAAATAAGACCCAACGCCAGTAGCTTATCAATACTGGCCAGCGCAACTTCAGTATCGGCCAC   |   |   |   |   |   |   |   |   |   |   |   |   |   |   |   |   |   |   |   |   |   |   |
| 8_047    | -----TGCCAATCCAGGCACAGTATCCGCAATACCAGCCGGTAGAAAATAAAACCCAACCATCGGTAGTATTATCAACACCAAGCCGTCAGCCGATTCAGTATCGGCCGT    |   |   |   |   |   |   |   |   |   |   |   |   |   |   |   |   |   |   |   |   |   |   |
| 8_074    | -----TGCCAATCCAGGCACAGTATCCGCAATACCAGCCGGTAGAAAATAAAACCCAACCATCGGTAGTATTATCAACACCAAGCCGTCAGCCGATTCAGTATCGGCCGT    |   |   |   |   |   |   |   |   |   |   |   |   |   |   |   |   |   |   |   |   |   |   |
| 8_094    | -----TGCCAATCCAGGCACAGTATCCGCAATACCAGCCGGTAGAAAATAAAACCCAACCATCGGTAGTATTATCAACACCAAGCCGTCAGCCGATTCAGTATCGGCCGT    |   |   |   |   |   |   |   |   |   |   |   |   |   |   |   |   |   |   |   |   |   |   |
| 8_121    | -----AGAAAATAAGACCCAACGCCAGTAGCTTATCAATACTGGCCAGCGCAACTTCAGTATCGGCCAC                                             |   |   |   |   |   |   |   |   |   |   |   |   |   |   |   |   |   |   |   |   |   |   |
| 8_235    | -----AGAAAATAAGACCCAACACCAGTAGCTTATCAATACTGGCCAGCGCAACTTCAGTATCGGCCAC                                             |   |   |   |   |   |   |   |   |   |   |   |   |   |   |   |   |   |   |   |   |   |   |
| 8_525    | -----AGAAAATAAGACCCAACACCAGTAGCTTATCAATACTGGCCAGCGCAACTTCAGTATCGGCCAC                                             |   |   |   |   |   |   |   |   |   |   |   |   |   |   |   |   |   |   |   |   |   |   |
| 8_559    | -----TGCCAATACAGACACAGTATCCACAATATCAGCTGGTAGAAAATAAAACCCAACCATCGGTAGTATTATCAACACTGGCCAGCGCAACTTCAGTATCGGCCAT      |   |   |   |   |   |   |   |   |   |   |   |   |   |   |   |   |   |   |   |   |   |   |
| 9_307    | -----AGAAAATAAGACCCAACGCCAGTAGCTTATCAATACTGGCCAGCGCAACTTCAGTATCGGCCAC                                             |   |   |   |   |   |   |   |   |   |   |   |   |   |   |   |   |   |   |   |   |   |   |
| 9_340    | ATCCCAGCAATGCCAATCCAGATACAGTATCCACAATATCAGCTGGTAGAAAATAAGACCCAACGCCAGTAGCTTATCAATACTGGCCAGCGCAACTTCAGTATCGGCCAC   |   |   |   |   |   |   |   |   |   |   |   |   |   |   |   |   |   |   |   |   |   |   |
| HML2_Rep | -----AGAAAATAAGACCCAACGCCAGTAGCTTATCAATACTGGCCAGCGCAACTTCAGTATCGGCCAC                                             |   |   |   |   |   |   |   |   |   |   |   |   |   |   |   |   |   |   |   |   |   |   |
| K113     | -----AGAAAATAAGACCCAACGCCAGTAGCTTATCAATACTGGCCAGCGCAACTTCAGTATCGGCCAC                                             |   |   |   |   |   |   |   |   |   |   |   |   |   |   |   |   |   |   |   |   |   |   |
| K115     | -----AGAAAATAAGACCCAACGCCAGTAGCTTATCAATACTGGCCAGCGCAACTTCAGTATCGGCCAC                                             |   |   |   |   |   |   |   |   |   |   |   |   |   |   |   |   |   |   |   |   |   |   |
| X_540    | -----AGAAAATAAGACCCAACGCCAGTAGCTTATCAATACTGGCCAGCGCAACTTCAGTATCGGCCAC                                             |   |   |   |   |   |   |   |   |   |   |   |   |   |   |   |   |   |   |   |   |   |   |
| Y_026    | -----TGCCAATCCAGACACAGTATCCACAATATCAGCTGGTAGAAAATAAAACCCAACCATCGGTAGTATTATCAACACCAAGCCGTCAGCCGATTCAGTATCGGCCGT    |   |   |   |   |   |   |   |   |   |   |   |   |   |   |   |   |   |   |   |   |   |   |
| 94       | -----AGAAAATAAGACCCAACACCAGTAGCTTATCAATACTGGCCAGCGCAACTTCAGTATCGGCCAC                                             |   |   |   |   |   |   |   |   |   |   |   |   |   |   |   |   |   |   |   |   |   |   |



|          | 3                                                                                                      | 3 | 3 | 3 | 3 | 3 | 3 | 3 | 3 | 4 | 4 | 4 | 4 | 4 | 4 | 4 | 4 | 4 | 4 |   |   |   |   |
|----------|--------------------------------------------------------------------------------------------------------|---|---|---|---|---|---|---|---|---|---|---|---|---|---|---|---|---|---|---|---|---|---|
|          | 5                                                                                                      | 5 | 6 | 6 | 7 | 7 | 8 | 8 | 9 | 9 | 0 | 0 | 1 | 1 | 2 | 2 | 3 | 3 | 4 | 4 | 5 | 5 | 6 |
| 10_019   | -----TTAATCCTACGGCACCACCTAGTAGACAGGGTAGTGAATTACATGAAATTATTGATAAG-----TCAAGAAA                          |   |   |   |   |   |   |   |   |   |   |   |   |   |   |   |   |   |   |   |   |   |   |
| 10_310   | -----TTAATCCTACGGCACCACCTAGTAGACAGGGTAGTGAATTACATGAAATTATTGATAAA-----TCAAGAAA                          |   |   |   |   |   |   |   |   |   |   |   |   |   |   |   |   |   |   |   |   |   |   |
| 11_233   | -----CGCCATTGGG                                                                                        |   |   |   |   |   |   |   |   |   |   |   |   |   |   |   |   |   |   |   |   |   |   |
| 11_277   | -----TTATCCTACAGCACCACCTAGTGGACAAGGTAGTGCATTACATAAAATTATTGATAAG-----GCAAG                              |   |   |   |   |   |   |   |   |   |   |   |   |   |   |   |   |   |   |   |   |   |   |
| 11_424   | -----TTAATCCTACGGCACCACCTAGTAGACAGGGTAGTGAATTACATGAAATTATTGATAAA-----TCAAGAAA                          |   |   |   |   |   |   |   |   |   |   |   |   |   |   |   |   |   |   |   |   |   |   |
| 11_456   | -----TTAATCCTACGGCACCACCTAGTAGACAGGGTAGTGAATTACATGAAATTATTGATAAG-----AGAAA                             |   |   |   |   |   |   |   |   |   |   |   |   |   |   |   |   |   |   |   |   |   |   |
| 12_216   | -----TTAATCCTACGGCACCACCTAGTAGACAGGGTAGTGAATTACATGAAATTATTGATAAA-----TCAAGAAA                          |   |   |   |   |   |   |   |   |   |   |   |   |   |   |   |   |   |   |   |   |   |   |
| 12_419   | -----GCTGTT-GGG                                                                                        |   |   |   |   |   |   |   |   |   |   |   |   |   |   |   |   |   |   |   |   |   |   |
| 14_023   | -----TTGATCCTACACTACCACCTAGTGGACAAGATAGTGCCTGCAAAAAATCATTGATAAA-----GCCAGAAA                           |   |   |   |   |   |   |   |   |   |   |   |   |   |   |   |   |   |   |   |   |   |   |
| 16_010   | GCGCTGTCTCCTCAGCCGCCCACTATGAGACTTAATCCAACAGCACCACCTAGTGGACAAGGTAGCAGCTGCACGGCATCATTGATGAA-----GCTAGAAA |   |   |   |   |   |   |   |   |   |   |   |   |   |   |   |   |   |   |   |   |   |   |
| 17_029   | -----                                                                                                  |   |   |   |   |   |   |   |   |   |   |   |   |   |   |   |   |   |   |   |   |   |   |
| 19_157   | -----TTAATCCTACATCACCACCTAGTAGACAGGGTGGTGCATTACATAAAATTATTGATAAG-----GCAAGAAA                          |   |   |   |   |   |   |   |   |   |   |   |   |   |   |   |   |   |   |   |   |   |   |
| 19_238   | -----TTAATCCTACGGCACCACCTAGTAGACAGGGTAGTGAATTACAGAAAATTATTGATAAG-----TCAAGAAA                          |   |   |   |   |   |   |   |   |   |   |   |   |   |   |   |   |   |   |   |   |   |   |
| 19_352   | -----TTAATCCTACGGCACCACCTAGTAGACAGGGTAGTGAATTACATGAAATTATTGATAAA-----TCAAGAAA                          |   |   |   |   |   |   |   |   |   |   |   |   |   |   |   |   |   |   |   |   |   |   |
| 19_407   | -----TTAATCCTACACCAACCTAGTGGACAAGGTAGTGCATTACATAAAATTATTGATAAG-----GCAAGAAA                            |   |   |   |   |   |   |   |   |   |   |   |   |   |   |   |   |   |   |   |   |   |   |
| 19_639   | -----GTCATA-GGG                                                                                        |   |   |   |   |   |   |   |   |   |   |   |   |   |   |   |   |   |   |   |   |   |   |
| 1_059    | -----TTAATCCTACATCACCACCTAGTGGACAAGGTAGTACACTGCATGAAATCATTGATAAA-----GCCAGAAA                          |   |   |   |   |   |   |   |   |   |   |   |   |   |   |   |   |   |   |   |   |   |   |
| 1_061    | -----TTAATCCTACATCACCACCTAGTGGACAAGGTAGTACACTGCATGAAATCATTGATAAA-----GCCAGAAA                          |   |   |   |   |   |   |   |   |   |   |   |   |   |   |   |   |   |   |   |   |   |   |
| 1_259    | -----TTAATCCTACGGCACCACCTAGTAGACAGGGTAGTGAATTACATGAAATTATTGATAAA-----TCAAGAAA                          |   |   |   |   |   |   |   |   |   |   |   |   |   |   |   |   |   |   |   |   |   |   |
| 1_504    | -----TTAATCCTACGGCACCACCTAGTAGACAGGGTAGTGAATTACATGAAATTATTGATAAA-----TCAAGAAA                          |   |   |   |   |   |   |   |   |   |   |   |   |   |   |   |   |   |   |   |   |   |   |
| 1_555    | -----AATCCTATGGCACCACCTAGTAGACAGGGTAGTGAATTACATGAAATTATTGATAAG-----TCAAGAAA                            |   |   |   |   |   |   |   |   |   |   |   |   |   |   |   |   |   |   |   |   |   |   |
| 20_078   | -----TTAATCCTACGGCACCACCTAGTGGACAAGGTAGTGCATTACATGAAATTATTGATAAG-----GCCAGAAA                          |   |   |   |   |   |   |   |   |   |   |   |   |   |   |   |   |   |   |   |   |   |   |
| 21_019   | -----TTAATCCTACGGCACCACCTAGTAGACAGGGTAGTGAATTACATGAAATTATTGATAAA-----TCAAGAAA                          |   |   |   |   |   |   |   |   |   |   |   |   |   |   |   |   |   |   |   |   |   |   |
| 22_012   | -----TTAATCCTACGGCACCACCTAGTAGACAGGGTAGTGAATTACATGAAATTATTGATAAA-----TCAAGAAA                          |   |   |   |   |   |   |   |   |   |   |   |   |   |   |   |   |   |   |   |   |   |   |
| 22_041   | GCGCTGTATCCTCAGCCGCCCACTGTGAGACTTAATCCTACAGCATCAGTAGTGGACAAGGTAGTGCCTGCATGCAGTCATTGATGAA-----GCCAGAAA  |   |   |   |   |   |   |   |   |   |   |   |   |   |   |   |   |   |   |   |   |   |   |
| 2_Tan    | -----TTAATCCTACGGCACCACCTAGTAGACAGGGTAGTGAATTACATGAAATTATTGATAAA-----TCAAGAAA                          |   |   |   |   |   |   |   |   |   |   |   |   |   |   |   |   |   |   |   |   |   |   |
| 3_014    | -----TTAATCCTACAGCACCACCTAGTAGACAGGGTAGTGCATTACATAAAATTATTGATAAG-----TCAAGAAA                          |   |   |   |   |   |   |   |   |   |   |   |   |   |   |   |   |   |   |   |   |   |   |
| 3_209    | -----TTGATCCTACAGCACCACCTAGTGGACAAGATAGTGCCTGCATGAGACCATTGCTACA-----GCCAGAAA                           |   |   |   |   |   |   |   |   |   |   |   |   |   |   |   |   |   |   |   |   |   |   |
| 3_294    | -----TTAATCCTACAGCATCAGTAGTGGACAAGGTAGTGCCTGCATGAGACCATTGCTACA-----GCCAGAAA                            |   |   |   |   |   |   |   |   |   |   |   |   |   |   |   |   |   |   |   |   |   |   |
| 3_354    | -----TTAATCCTACGGCACCACCTAGTAGACAGGGTAGTGAATTACATGAAATTATTGATAAA-----TCAAGAAA                          |   |   |   |   |   |   |   |   |   |   |   |   |   |   |   |   |   |   |   |   |   |   |
| 3_385    | -----TTAATCCTACGGCACCACCTAGTAGACAGGGTAGTGAATTACATGAAATTATTGATAAA-----TCAAGAAA                          |   |   |   |   |   |   |   |   |   |   |   |   |   |   |   |   |   |   |   |   |   |   |
| 3_496    | -----TTAATCCTACGGCACCACCTAGTAGACAGGGTAGTGAATTACATGAAATTATTGATAAA-----TCAAGAAA                          |   |   |   |   |   |   |   |   |   |   |   |   |   |   |   |   |   |   |   |   |   |   |
| 3_610    | -----TTAATCCTACGGCACCACCTAGTAGACAGGGTAGTGAATTACATGAAATTATTGATAAA-----TCAAGAAA                          |   |   |   |   |   |   |   |   |   |   |   |   |   |   |   |   |   |   |   |   |   |   |
| 4_008    | -----TTAATCCTACGGCACCACCTAGTGGACAAGATAGTGCCTGCATGAGACCATTGCTACA-----GCCAGAAA                           |   |   |   |   |   |   |   |   |   |   |   |   |   |   |   |   |   |   |   |   |   |   |
| 4_032    | -----TTGATCCTACAGTACCACCTAGTGGACAAGATAGTGCCTGCATGAGACCATTGCTACA-----GCCAGAAA                           |   |   |   |   |   |   |   |   |   |   |   |   |   |   |   |   |   |   |   |   |   |   |
| 4_052    | -----TTGATCCTACAGTACCACCTAGTGGACAAGATAGTGCCTGCATGAGACCATTGCTACA-----GCCAGAAA                           |   |   |   |   |   |   |   |   |   |   |   |   |   |   |   |   |   |   |   |   |   |   |
| 4_068    | -----TTGATCCTACAGTACCACCTAGTGGACAAGATAGTGCCTGCATGAGACCATTGCTACA-----GCCAGAAA                           |   |   |   |   |   |   |   |   |   |   |   |   |   |   |   |   |   |   |   |   |   |   |
| 4_716    | -----TTAATCCTACGGCACCACCTAGTAGACAGGGTAGTGAATTACATGAAATTATTGATAAA-----TCAAGAAA                          |   |   |   |   |   |   |   |   |   |   |   |   |   |   |   |   |   |   |   |   |   |   |
| 4_742    | -----TTAATCCTATGGCACCACCTAGTAGACAGGGTAGTGCATTACATAAAATTATTGATAAG-----TCAAGAAA                          |   |   |   |   |   |   |   |   |   |   |   |   |   |   |   |   |   |   |   |   |   |   |
| 5_147    | -----TTAATCCTACGGCACCACCTAGTAGACAGGGTAGTGAATTACATGAAATTATTGATAAA-----TCAAGAAA                          |   |   |   |   |   |   |   |   |   |   |   |   |   |   |   |   |   |   |   |   |   |   |
| 5_259    | -----TTAATCCAACAGCACCACCTAGTCAACAGGGTAGTGCCTTACATAAAATTATTGATAAA-----TCAAGAAA                          |   |   |   |   |   |   |   |   |   |   |   |   |   |   |   |   |   |   |   |   |   |   |
| 5_535    | -----TTGATCCTACAGCACCACCTAGTGTACAAGATAGTGCCTGCATGAGACCATTGCTACA-----GCCAGAAA                           |   |   |   |   |   |   |   |   |   |   |   |   |   |   |   |   |   |   |   |   |   |   |
| 5_544    | -----TTAATCCTACGGCACCACCTAGTAGACAGGGTAGTGAATTACATGAAATTATTGATAAA-----TCAAGAAA                          |   |   |   |   |   |   |   |   |   |   |   |   |   |   |   |   |   |   |   |   |   |   |
| 6_098    | -----TTAATCCTACAGCACCACCTAGTGGACAAGATAGTGCCTGCATGAGACCATTGCTACA-----GCCAGAAA                           |   |   |   |   |   |   |   |   |   |   |   |   |   |   |   |   |   |   |   |   |   |   |
| 6_178    | -----TTAATCCTACGGCACCACCTAGTGGACAAGGTAGTGCCTGCATGAAATTATTGATAAA-----GCCACT                             |   |   |   |   |   |   |   |   |   |   |   |   |   |   |   |   |   |   |   |   |   |   |
| 6_240    | -----GCCATT-GGG                                                                                        |   |   |   |   |   |   |   |   |   |   |   |   |   |   |   |   |   |   |   |   |   |   |
| 6_324    | -----TTAATCCTACGGCACCACCTAGTAGACAGGGTAGTGAATTACATGAAATTATTGATAAA-----TCAAGAAA                          |   |   |   |   |   |   |   |   |   |   |   |   |   |   |   |   |   |   |   |   |   |   |
| 7_345    | -----TTAATCCTACGGCACCACCTAGTAGACAGGGTAGTGAATTACATGAAATTATTGATAAA-----TCAAGAAA                          |   |   |   |   |   |   |   |   |   |   |   |   |   |   |   |   |   |   |   |   |   |   |
| 7_450    | -----TTAATCCTACAGCACCACCTAGTGGACAAGATAGTGCCTGCATGAGACCATTGCTACA-----GCCAGAAA                           |   |   |   |   |   |   |   |   |   |   |   |   |   |   |   |   |   |   |   |   |   |   |
| 8_047    | -----TTGATCCTACGGTACCACCTAGTGGACAAGATAGTGCCTGCATGAGACCATTGCTACA-----GCCAGAAA                           |   |   |   |   |   |   |   |   |   |   |   |   |   |   |   |   |   |   |   |   |   |   |
| 8_074    | -----TTGATCCTACGGTACCACCTAGTGGACAAGATAGTGCCTGCATGAGACCATTGCTACA-----GCCAGAAA                           |   |   |   |   |   |   |   |   |   |   |   |   |   |   |   |   |   |   |   |   |   |   |
| 8_094    | -----TTGATCCTACGGTACCACCTAGTGGACAAGATAGTGCCTGCATGAGACCATTGCTACA-----GCCAGAAA                           |   |   |   |   |   |   |   |   |   |   |   |   |   |   |   |   |   |   |   |   |   |   |
| 8_121    | -----                                                                                                  |   |   |   |   |   |   |   |   |   |   |   |   |   |   |   |   |   |   |   |   |   |   |
| 8_235    | -----GCCATT-GGG                                                                                        |   |   |   |   |   |   |   |   |   |   |   |   |   |   |   |   |   |   |   |   |   |   |
| 8_525    | -----TTAATCCTACGGCACCACCTAGTAGACAGGGTAGTGAATTACATGAAATTATTGATAAA-----TCAAGAAA                          |   |   |   |   |   |   |   |   |   |   |   |   |   |   |   |   |   |   |   |   |   |   |
| 8_559    | -----TTGATCCTACAGTACCAGTAGTGGACAAGATAGTGCCTGCATGAGACCATTGCTACA-----GCCAGAAA                            |   |   |   |   |   |   |   |   |   |   |   |   |   |   |   |   |   |   |   |   |   |   |
| 9_307    | -----GCCATT-GGG                                                                                        |   |   |   |   |   |   |   |   |   |   |   |   |   |   |   |   |   |   |   |   |   |   |
| 9_340    | -----GTAATCCTACAGCACCACCTAGTGGACAAGGTAGTGCCTGCATGAGACCATTGCTACA-----ACA                                |   |   |   |   |   |   |   |   |   |   |   |   |   |   |   |   |   |   |   |   |   |   |
| HML2_Rep | -----TTAATCCTACGGCACCACCTAGTAGACAGGGTAGTGAATTACATGAAATTATTGATAAA-----TCAAGAAA                          |   |   |   |   |   |   |   |   |   |   |   |   |   |   |   |   |   |   |   |   |   |   |
| K113     | -----TTAATCCTACGGCACCACCTAGTAGACAGGGTAGTGAATTACATGAAATTATTGATAAA-----TCAAGAAA                          |   |   |   |   |   |   |   |   |   |   |   |   |   |   |   |   |   |   |   |   |   |   |
| K115     | -----TTAATCCTACGGCACCACCTAGTAGACAGGGTAGTGAATTACATGAAATTATTGATAAA-----TCAAGAAA                          |   |   |   |   |   |   |   |   |   |   |   |   |   |   |   |   |   |   |   |   |   |   |
| X_540    | -----GCCGTC-ACG                                                                                        |   |   |   |   |   |   |   |   |   |   |   |   |   |   |   |   |   |   |   |   |   |   |
| Y_026    | -----TTGATCCTACAGTACCACCTAGTGGACAAGATAGTGCCTGCATGAAATCATTGATAAA-----GCCAGAAA                           |   |   |   |   |   |   |   |   |   |   |   |   |   |   |   |   |   |   |   |   |   |   |
| 94       | -----TTAATCCTACGGCACCACCTAGTAGACAGGGTAGTGAATTACATAAAATTATTGATGAG-----GCAAGAAA                          |   |   |   |   |   |   |   |   |   |   |   |   |   |   |   |   |   |   |   |   |   |   |

4 4 4 4 4 4 4 5 5 5 5 5 5 5 5 5 5 5 5 5
6 7 7 8 8 9 9 0 0 1 1 2 2 3 3 4 4 5 5 6 6 7 7
5 0 5 0 5 0 5 5 5 5 5 5 5 5 5 5 5 5 5 5 5 5
10\_019 GA--CACTGAGGGTGGCAATCCCCAGTAACCTTGAACCCATACCACCTGGAGAAGGA-----GCCCAAGAGGGGAGAGCCCTCCACAGTTGAGGCCAGATACAAGTCT
10\_310 GA--TACTGAGGGGTGGCAATCCCCAGTAACCTTGAACCCATACCACCTGGAGAAGGA-----GCCCAAGAGGGGAGAGCCCTCCACAGTTGAGGCCAGATACAAGTCT
11\_233 GC---TAAACCACAGATGGCCACC--TCCTCCTCAGCCGAGTGAGTGTGGGGAGGG-----AGCCTGAAGCTAGGCTCCTGTGTACTCA-TTTGTGCACCCATTA
11\_277 GA--TATTGAGGGTGGCAATCCCCAGTA-----CCCATCCACCTGGAGAAGGG-----GCCCAAGAGGGGAGAGCCCTCCACAGTTGAGGCCAGATACAAGTCT
11\_424 GA--TACTGAGGGCATGGCAATCCCCAGTAACCTTGAACCCATACCACCTGGAGAAGGA-----GCCCAAGAGGGGAGAGCCCTCCACAGTTGAGGCCAGATACAAGTCT
11\_456 GA--TACTGAGGGGTGGCAATCCCCAGTAACCTTGAACCCATACCACCTGGAGAAGGA-----GCCCAAGAGGGGAGAGCCCTCCACAGTTGAGGCCAGATACAAGTCT
12\_216 GA--TACTGAGGGCATGGCAATCCCCAGTAACCTTGAACCCATACCACCTGGAGAAGGA-----GCCCAAGAGGGGAGAGCCCTCCACAGTTGAGGCCAGATACAAGTCT
12\_419 CT---TAAAGCACAGATGGCCACC--TCCTCCTCAGCCGAGTGAGTGTGGGGAGGG-----AGCCTGAAGCTAGGCTCCTGTGTACTCA-TTTGTGCACCCATTA
14\_023 GA--TCTTGAGGCGAGGGCAGTTCCCTGTAAATTTTACAACCAATACCAGCTGGAAAACGG-----AGTCAACAGGAGCCTGTGTCCAACTGAGGCCTAGATATGATCT
16\_010 GA--TCTTGAGGGTGGCAGTTCCCTGTAAATTTTACAACCAATACCAGCTGGAAAACGG-----AGTCAACAGGAGCCTGTGTCCAACTGAGGCCTAGATATGATCT
17\_029 -----
19\_157 GA--TATCGAGGCCTGGCAGTTCCCCAGTAATATTAGACCATACCACCTGAAGAAGGG-----GCCCAAGAGGGGAGAGCCCTCCCTAGCTGAGGCCAGATATGAGTCT
19\_238 GA--TATTGAGGGCATGGCAATCCCAATAAATCTTAGA-----ACCACCTGGAGAAGGA-----GCCCAAGAGGGGAGAGCCCTCCACAGTTGAGGCCAGATACAAGTCT
19\_352 GA--TACTGAGGGCATGGCAATCCCCAGTAACCTTGAACCCATACCACCTGGAGAAGGA-----GCCCAAGAGGGGAGAGCCCTCCACAGTTGAGGCCAGATACAAGTCT
19\_407 GA--TACCAGGCGATGGCAATCCCCAGTAATATTAGACCATACCACCTGAAGAAGG-----GCCCAAGAGGGGAGAGCCCTCCCTAGCTGAGGCCAGATATGAGTCT
19\_639 GC---TAAACCACAGATGGCCACC--TCCTCCTCAGCCGAGTGAGTGTGGGGAGGG-----AGCCTGAAGCTAGGCTCCTGTGTACTCA-TTTGTGCACCCATTA
1\_059 GA--TCTTGAGGGCATGGCAGTTCCCTGTAAATTTTACAACCAATACCAGCTGGAAAAGGG-----GGGCAAGCTGGAGCCTGTGTCCAACTGAGGCCTAGATATGATCT
1\_061 GA--TCTTGAGGGCATGGCAGTTCCCTGTAAATTTTACAACCAATACCAGCTGGAAAAGGG-----GGGCAAGCTGGAGCCTGTGTCCAACTGAGGCCTAGATATGATCT
1\_259 GA--TACTGAGGGCATGGCAATCCCCAGTAACCTTGAACCCATACCACCTGGAGAAGGA-----GCCCAAGAGGGGAGAGCCCTCCACAGTTGAGGCCAGATACAAGTCT
1\_504 GA--TACTGAGGGCATGGCAATCCCCAGTAACCTTGAACCCATACCACCTGGAGAAGGA-----GCCCAAGAGGGGAGAGCCCTCCACAGTTGAGGCCAGATACAAGTCT
1\_555 GA--TACTGAGGGGTGGCAATCCCCAGTAACCTTGAACCCATACCACCTGGAGAAGGA-----GCCCAAGAGGGGAGAGCCCTCCACAGTTGAGGCCAGATACAAGTCT
20\_078 GAGATACTGAGGGTTTTAAATTCACAGTAATATTAGACCATACCACCTGGAGAAGGG-----TCCCAGCTGATGCCAGATATGAGTCT
21\_019 GA--TACTGAGGGCATGGCAATCCCCAGTAACCTTGAACCCATACCACCTGGAGAAGGA-----GCCCAAGAGGGGAGAGCCCTCCACAGTTGAGGCCAGATACAAGTCT
22\_012 GA--TACTGAGGGCATGGCAATCCCCAGTAACCTTGAACCCATACCACCTGGAGAAGGA-----GCCCAAGAGGGGAGAGCCCTCCACAGTTGAGGCCAGATACAAGTCT
22\_041 GA--TCTTGAGGGCATGGCAATCCCCAGTAACCTTGAACCCATACCACCTGGAGAAGG-----ACTCAAGTAGGACCGCTGTGTCCAACTGAGGCCTAGATATGATCT
2\_Tan GA--TACTGAGGGCATGGCAATCCCCAGTAACCTTGAACCCATACCACCTGGAGAAGGA-----GCCCAAGAGGGGAGAGCCCTCCACAGTTGAGGCCAGATACAAGTCT
3\_014 GA--TATTGAGGGGTGGCCATCCCACTAATCTTAGAAGTATACCACCTGGAGAAGGA-----GCCCAAGAGGGGAGAGCCCTCCACAGTTGAGGCCAGATACAAGTCT
3\_209 GA--TCTTGAGGGCATGGCAATCCCCAGTAACCTTGAACCCATACCACCTGGAGAAGGG-----AGTCAACAGGAGCCTGTGTCCAACTGAGGCCTAGATATGATCT
3\_294 GA--TCTTGAGGGCATGGCGGTTCCCTGTAAATTTTACAACCAATACCAGCTGGAAAAGGG-----ACTCAAGTAGGACCGCTGTGTCCAACTGAGGCCTAGATATGATCT
3\_354 GA--TACTGAGGGCATGGCAATCCCCAGTAACCTTGAACCCATACCACCTGGAGAAGGA-----GCCCAAGAGGGGAGAGCCCTCCACAGTTGAGGCCAGATACAAGTCT
3\_385 GA--TACTGAGGGCATGGCAATCCCCAGTAACCTTGAACCCATACCACCTGGAGAAGGG-----GCCCAAGAGGGGAGAGCCCTCCACAGTTGAGGCCAGATACAAGTCT
3\_496 GA--TACTGAGGGCATGGCAATCCCCAGTAACCTTGAACCCATACCACCTGGAGAAGGA-----GCCCAAGAGGGGAGAGCCCTCCACAGTTGAGGCCAGATACAAGTCT
3\_610 GA--TACTGAGGGCATGGCAATCCCCAGTAACCTTGAACCCATACCACCTGGAGAAGGA-----GCCCAAGAGGGGAGAGCCCTCCACAGTTGAGGCCAGATACAAGTCT
4\_008 GA--TCTTGAGGGCATGGCAATCCCCAGTAACCTTGAACCCATACCACCTGGAGAAGGG-----ACTCAAGTAGGACCGCTGTGTCCAACTGAGGCCTAGATATGATCT
4\_032 GA--TCTTGAGGGCATGGCAATATCCGGCAATCTTACAACCATACCAGCTGGAAAAGGG-----AGTCAACAGGAGCCTGTGTCCAACTGAGGCCTAGATATGATCT
4\_052 GA--TCTTGAGGGCATGGCAATATCCGGCAATCTTACAACCATACCAGCTGGAAAAGGG-----AGTCAACAGGAGCCTGTGTCCAACTGAGGCCTAGATATGATCT
4\_068 GA--TCTTGAGGGCATGGCAATATCCGGCAATCTTACAACCATACCAGCTGGAAAAGGG-----AGTCAACAGGAGCCTGTGTCCAACTGAGGCCTAGATATGATCT
4\_716 GA--TACTGAGGGCATGGCAATCCCCAGTAACCTTGAACCCATACCACCTGGAGAAGGA-----GCCCAAGAGGGGAGAGCCCTCCACAGTTGAGGCCAGATACAAGTCT
4\_742 GA--TACTGAGGGCATGGCAATCCCCAGTAACCTTGAACCCATACCACCTGGAGAAGGG-----GCCCAAGAGGGGAGAGCCCTCCACAGTTGAGGCCAGATACAAGTCT
5\_147 GA--TACTGAGGGCATGGCAATCCCCAGTAACCTTGAACCCATACCACCTGGAGAAGGG-----GCCCAAGAGGGGAGAGCCCTCCACAGTTGAGGCCAGATACAAGTCT
5\_259 GA--TATTGAGGGCATGGCAATCCCCAGTAACCTTGAACCCATACCACCTGGAGAAGGG-----GCCCAAGAGGGGAGAGCCCTCAACAGTTGAGGCCAGATATGAGTCT
5\_535 GA--TCTTGAGGGCATGGCAGTACCAGTAATTTTACAACCATACCAGCTGGAAAAGGG-----AGTCAACAGGAGCCTGTGTCCAACTGAGGCCTAGATATGATCT
5\_544 GA--TACTGAGGGCATGGCAATCCCCAGTAACCTTGAACCCATACCACCTGGAGAAGGG-----GCCCAAGAGGGGAGAGCCCTCCACAGTTGAGGCCAGATACAAGTCT
6\_098 GA--TACTGAGGGCATGGCAATCCCCAGTAACCTTGAACCCATACCACCTGGAGAAGGG-----GCCCAAGAGGGGAGAGCCCTCCCTAGCTGAGGCCAGATATGAGTCT
6\_178 GA--TCTTGAGGGCATGGCAGTACCAGTAATTTTACAACCATACCAGCTGGAAAAGGG-----ACTTAGCAGGAGCCTGTGTCCAACTGAGGCCTAGATATGATCT
6\_240 GC---TAAACCACAGATGGCCACC--TCCTCCTCAGCCGAGTGAGTGTGGGGAGGG-----AACCAGAACTAGGCTCCTGTGTACTTGGTTACAGCACCCATTA
6\_324 GA--TACTGAGGGCATGGCAATCCCCAGTAACCTTGAACCCATACCACCTGGAGAAGGA-----GCCCAAGAGGGGAGAGCCCTCCACAGTTGAGGCCAGATACAAGTCT
7\_345 GA--TACTGAGGGCATGGCAATCCCCAGTAACCTTGAACCCATACCACCTGGAGAAGGG-----GCCCAAGAGGGGAGAGCCCTCCACAGTTGAGGCCAGATACAAGTCT
7\_450 GA--TATTGAGGGCATGGCAATCCCCAGTAATATTAGAACCAATACCACCTGGAGAAGGG-----GCCCAAGAGGGGAGAGCCCTCCCTAGCTGAGGCCAGATATGAGTCT
8\_047 GA--TCTTGAGGGCATGGCAATATCCGGTAATCTTACAACCATACCAGCTGGAAAAGGG-----AGTCAAGCA-----
8\_074 GA--TCTTGAGGGCATGGCAATATCCGGTAATCTTACAACCATACCAGCTGGAAAAGGG-----AGTCAAGCA-----
8\_094 GA--TCTTGAGGGCATGGCAATATCCGGTAATCTTACAACCATACCAGCTGGAAAAGGG-----AGTCAAGCA-----
8\_121 -----
8\_235 GC---TAAACCACAGATGGCCACC--TCCTCCTCAGCTGAGTGAGTGTGGGGAGGG-----AACCAGAACTAGGCTCCTGTGTACTTGGTTACAGCACCCATTA
8\_525 GA--TACTGAGGGCATGGCAATCCCCAGTAACCTTGAACCCATACCACCTGGAGAAGGG-----GCCCAAGAGGGGAGAGCCCTCCACAGTTGAGGCCAGATACAAGTCT
8\_559 GA--TCTTGAGGGCATGGCAGTATCCGGTAATCTTACAACCATACCAGCTGGAAAAGGGCCAGGAAAGGGAGTCAAGCAGGAGCCTGTGTCCAACTGAGGCCTAGATATGATCT
9\_307 GC---TAAACCACAGATGGCCACC--TCCTCCTCAGCCGAGTGAGTGTGGGGAGGG-----AGCCTGAAGCTAGGCTCCTGTGTACTTGGTTACAGCACCCATTA
9\_340 GA--TACTGAGGGCATGGCAATCCCCAGTAACCTTGAACCCATACCACCTGGAGAAGGG-----GCCCAAGAGGGGAGAGCCCTCCCTAGCTGAGGCCAGATACAAGTCT
HML2\_Rep GA--TACTGAGGGCATGGCAATCCCCAGTAACCTTGAACCCATACCACCTGGAGAAGGA-----GCCCAAGAGGGGAGAGCCCTCCACAGTTGAGGCCAGATACAAGTCT
K113 GA--TACTGAGGGCATGGCAATCCCCAGTAACCTTGAACCTATACCACCTGGAGAAGGG-----GCCCAAGAGGGGAGAGCCCTCCACAGTTGAGGCCAGATACAAGTCT
K115 GA--TACTGAGGGCATGGCAATCCCCAGTAACCTTGAACCCATACCACCTGGAGAAGGG-----GCCCAAGAGGGGAGAGCCCTCCACAGTTGAGGCCAGATACAAGTCT
X\_540 GC---TAAACCACAGATGGCCACC--TCCTCCTCAGTCGAGTGAGTGTGGGGAGGG-----AGCCTGAAGCTAGGCTCCTGTGTACTTGGTTACAGCACCCATTA
Y\_026 GA--TCTTGAGGGCATGGCAGTACCAGTAATTTTACAACCCAC--CCGGCCGGGAAAGGG-----AGTCAACAGGAGCCTGTGTCCAACTGAGGCCTAGATATGATCT
94 GA--TATTGAGGGCATGGCAATCCCCAGTAATATTAGAACCAATACCACCTGGAGAAGGG-----GCCCAAGAGGGGAGAGCCCTCCCTAGCTGAGGCCAGATATGAGTCT





|          | 6                                                                                                                | 7 | 7 | 7 | 7 | 7 | 7 | 7 | 7 | 7 | 7 | 7 | 7 | 7 | 7 | 7 | 7 | 7 | 7 | 7 | 8 | 8 | 8 | 8 |
|----------|------------------------------------------------------------------------------------------------------------------|---|---|---|---|---|---|---|---|---|---|---|---|---|---|---|---|---|---|---|---|---|---|---|
|          | 9                                                                                                                | 0 | 0 | 1 | 1 | 2 | 2 | 3 | 3 | 4 | 4 | 5 | 5 | 6 | 6 | 7 | 7 | 8 | 8 | 9 | 9 | 0 | 0 | 0 |
|          | 5                                                                                                                | 0 | 5 | 0 | 5 | 0 | 5 | 0 | 5 | 0 | 5 | 0 | 5 | 0 | 5 | 0 | 5 | 0 | 5 | 0 | 5 | 0 | 5 | 0 |
| 10_019   | TTCC-TTA--TGATTGGGAGA-TTCTGGCAAATCGTCTCT-CTCACCCCTC-TCAATTTTACAATTTAAGACTTGGTG-----GATTGATGGG----GCACAAGAAC      |   |   |   |   |   |   |   |   |   |   |   |   |   |   |   |   |   |   |   |   |   |   |   |
| 10_310   | TTCC-TTA--TGATTGGGAGA-TTCTGGCAAATCGTCTCT-CTCACCCCTC-TCAATTTTACAATTTAAGACTTGGTG-----GATTGATGGG----GTACAAGAAC      |   |   |   |   |   |   |   |   |   |   |   |   |   |   |   |   |   |   |   |   |   |   |   |
| 11_233   | CTACATAAATAGTTAAAAA-CTATTGTAAGGACATGTTTCACCAATG-----                                                             |   |   |   |   |   |   |   |   |   |   |   |   |   |   |   |   |   |   |   |   |   |   |   |
| 11_277   | TTCC-TTA--TGATTGGGAGA-TTCTGGCAAATCGTCTCT-CTCACCTGTC-TCAATTTTACAATTTAAGACTTGGTG-----GATTGATGGG----GCACAAGAAC      |   |   |   |   |   |   |   |   |   |   |   |   |   |   |   |   |   |   |   |   |   |   |   |
| 11_424   | TTCC-TTA--TGATTGGGAGA-TTCTGGCAAATCGTCTCT-CTCACCCCTC-TCAATTTTACAATTTAAGACTTGGTG-----GATTGATGGG----GTACAAGAAC      |   |   |   |   |   |   |   |   |   |   |   |   |   |   |   |   |   |   |   |   |   |   |   |
| 11_456   | TTCC-TTA--TGATTGGGAGA-TTCTGGCAAAGATCATCTCT-CTCACCCCTC-TCAATTTTACAATTTAAGACTTGGTG-----GATTGATGGG----GTACAAGAAC    |   |   |   |   |   |   |   |   |   |   |   |   |   |   |   |   |   |   |   |   |   |   |   |
| 12_216   | TTCC-TTA--TGATTGGGAGA-TTCTGGCAAATCGTCTCT-CTCACCCCTC-TCAATTTTACAATTTAAGACTTGGTG-----GATTGATGGG----GTACAAGAAC      |   |   |   |   |   |   |   |   |   |   |   |   |   |   |   |   |   |   |   |   |   |   |   |
| 12_419   | TTACATAAATAGTTAAAAA-CTATTGTAAGGATGTTTCCACCCACT-----                                                              |   |   |   |   |   |   |   |   |   |   |   |   |   |   |   |   |   |   |   |   |   |   |   |
| 14_023   | TTCC-TTA--TGATTGGGAAA-TTTPGGCTAAATCTTCTCT-TTCACCCCTC-TCACTATCTACAATTTAAACCTGGTG-----GATTGACGGA----GTACAAGAAC     |   |   |   |   |   |   |   |   |   |   |   |   |   |   |   |   |   |   |   |   |   |   |   |
| 16_010   | -----                                                                                                            |   |   |   |   |   |   |   |   |   |   |   |   |   |   |   |   |   |   |   |   |   |   |   |
| 17_029   | CTCC-GTG--TGATTGGGAGA-TTTTAAAGAAAGTAACT-TTCGCCCTC-CCAATTTCTTCACTTTAAGACTTGGTG-----GACCGACGAG----GCTCAA AATC      |   |   |   |   |   |   |   |   |   |   |   |   |   |   |   |   |   |   |   |   |   |   |   |
| 19_157   | TTCC-TTA--TGATTGGGAGA-TTTPGGCAAATCATCACT-CTCACCCCTC-T-ATCTTTTACAATTTAAGACTTGGTG-----GATTGATGGG----GTACAAGAAC     |   |   |   |   |   |   |   |   |   |   |   |   |   |   |   |   |   |   |   |   |   |   |   |
| 19_238   | TTCC-TTA--TGATTGGGAGA-TTCTGGCAAATCGTCTCT-CTCACCCCTC-TCAATTTTACAATTTAAGACTTGGTG-----GATTGATGGG----GCACAAGAAC      |   |   |   |   |   |   |   |   |   |   |   |   |   |   |   |   |   |   |   |   |   |   |   |
| 19_352   | TTCC-TTA--TGATTGGGAGA-TTCTGGCAAATCGTCTCT-CTCACCCCTC-TCAATTTTACAATTTAAGACTTGGTG-----GATTGATGGG----GTACAAGAAC      |   |   |   |   |   |   |   |   |   |   |   |   |   |   |   |   |   |   |   |   |   |   |   |
| 19_407   | TTCT-TTA--TGATTGGGAGA-TTTPGGCAAATGATCGCT-CTCACCCCTC-TCAATGTTTACAATTTAAGACTTGGTGAAGACTTGGTGATGATGGG----GCACAAGAAC |   |   |   |   |   |   |   |   |   |   |   |   |   |   |   |   |   |   |   |   |   |   |   |
| 19_639   | CTACATAAATAGTTAAAAA-CTACTTAAAAA-GGACACTTTCACCCACT-----                                                           |   |   |   |   |   |   |   |   |   |   |   |   |   |   |   |   |   |   |   |   |   |   |   |
| 1_059    | TTCC-CTA--TGATTGGGAAA-CGTGGCTAAATCTTCCCT-TTCACCCCTC-TCACTTCTACAATTTAAACCTGGTG-----GATTGATGGA----GTACAAGAAC       |   |   |   |   |   |   |   |   |   |   |   |   |   |   |   |   |   |   |   |   |   |   |   |
| 1_061    | TTCC-CTA--TGATTGGGAAA-TGTGGCTAAATCTTCCCT-TTCACCCCTC-TCACTTCTACAATTTAAACCTGGTG-----GATTGATGGA----GTACAAGAAC       |   |   |   |   |   |   |   |   |   |   |   |   |   |   |   |   |   |   |   |   |   |   |   |
| 1_259    | TTCC-TTA--TGATTGGGAGA-TTCTGGCAAATCGTCTCT-CTCACCCCTC-TCAATTTTACAATTTAAGACTTGGTG-----GATTGATGGG----GTACAAGAAC      |   |   |   |   |   |   |   |   |   |   |   |   |   |   |   |   |   |   |   |   |   |   |   |
| 1_504    | TTCC-TTA--TGATTGGGAGA-TTCTGGCAAATCGTCTCT-CTCACCCCTC-TCAATTTTACAATTTAAGACTTGGTG-----GATTGATGGG----GTACAAGAAC      |   |   |   |   |   |   |   |   |   |   |   |   |   |   |   |   |   |   |   |   |   |   |   |
| 1_555    | TTCC-TTA--TGATTGGGAGA-TTCTGGCAAATCATCTCT-CTCACCCCTC-TCAATTTTACAATTTAAGACTTGGTG-----AATTGATGGG----GCACAAGAAC      |   |   |   |   |   |   |   |   |   |   |   |   |   |   |   |   |   |   |   |   |   |   |   |
| 20_078   | TTCC-TTA--TGATTGGGAGA-TTTPGGCAAATCATCACT-CTCACCCCTC-TCAATTTTACAATTTAAGACTTGGTG-----GATTGATGGG----GTACAAGAAC      |   |   |   |   |   |   |   |   |   |   |   |   |   |   |   |   |   |   |   |   |   |   |   |
| 21_019   | TTCC-TTA--TGATTGGGAGA-TTCTGGCAAATCGTCTCT-CTCACCCCTC-TCAATTTTACAATTTAAGACTTGGTG-----GATTGATGGG----GTACAAGAAC      |   |   |   |   |   |   |   |   |   |   |   |   |   |   |   |   |   |   |   |   |   |   |   |
| 22_012   | TTCC-TTA--TGATTGGGAGA-TTCTGGCAAATCGTCTCT-CTCACCCCTC-TCAATTTTACAATTTAAGACTTGGTG-----GATTGATGGG----GTACAAGAAC      |   |   |   |   |   |   |   |   |   |   |   |   |   |   |   |   |   |   |   |   |   |   |   |
| 22_041   | CTCC-TTA--TGACTGGGAAA-TTTPGGCAAATCTTCCCT-TTCACCCCTC-TCACTATCTACAGTTTAAACCTGGTG-----GATTGATGGA----GTACAAGAAC      |   |   |   |   |   |   |   |   |   |   |   |   |   |   |   |   |   |   |   |   |   |   |   |
| 2_Tan    | TTCC-TTA--TGATTGGGAGA-TTCTGGCAAATCGTCTCT-CTCACCCCTC-TCAATTTTACAATTTAAGACTTGGTG-----GATTGATGGG----GTACAAGAAC      |   |   |   |   |   |   |   |   |   |   |   |   |   |   |   |   |   |   |   |   |   |   |   |
| 3_014    | TTCC-TTA--TGATTGGGAGA-TTCTGGCAAATCGTCTCT-CTCACCCCTC-TCAATTTTACAATTTAAGACTTGGTG-----GATTAATGGG----GCACAAGAAC      |   |   |   |   |   |   |   |   |   |   |   |   |   |   |   |   |   |   |   |   |   |   |   |
| 3_209    | TTCC-TTA--TGATTGGGAGA-TTTPGGCAAATCATCACT-CTCACCCCTC-TCAATTTTACAATTTAAGACTTGGTG-----GATTGATGGG----GTACAAGAAC      |   |   |   |   |   |   |   |   |   |   |   |   |   |   |   |   |   |   |   |   |   |   |   |
| 3_294    | CTCC-TTA--TGACTGGGAAA-GTTPGGCAAATCTTCCCT-TTCACCCCTC-TCACTATCTACAGTTTAAACCTGGTG-----GATTGATGGA----GTACAAGAAC      |   |   |   |   |   |   |   |   |   |   |   |   |   |   |   |   |   |   |   |   |   |   |   |
| 3_354    | TTCC-TTA--TGATTGGGAGA-TTCTGGCAAATCGTCTCT-CTCACCCCTC-TCAATTTTACAATTTAAGACTTGGTG-----GATTGATGGG----GTACAAGAAC      |   |   |   |   |   |   |   |   |   |   |   |   |   |   |   |   |   |   |   |   |   |   |   |
| 3_385    | TTCC-TTA--TGATTGGGAGA-TTCTGGCAAATCGTCTCT-CTCACCCCTC-TCAATTTTACAATTTAAGACTTGGTG-----GATTGATGGG----GTACAAGAAC      |   |   |   |   |   |   |   |   |   |   |   |   |   |   |   |   |   |   |   |   |   |   |   |
| 3_496    | TTCC-TTA--TGATTGGGAGA-TTCTGGCAAATCGTCTCT-CTCACCCCTC-TCAATTTTACAATTTAAGACTTGGTG-----GATTGATGGG----GTACAAGAAC      |   |   |   |   |   |   |   |   |   |   |   |   |   |   |   |   |   |   |   |   |   |   |   |
| 3_610    | TTCC-TTA--TGATTGGGAGA-TTCTGGCAAATCGTCTCT-CTCACCCCTC-TCAATTTTACAATTTAAGACTTGGTG-----GATTGATGGG----GTACAAGAAC      |   |   |   |   |   |   |   |   |   |   |   |   |   |   |   |   |   |   |   |   |   |   |   |
| 4_008    | TTCC-TTA--TGATTGGGAGA-TTTPGGCAAATCATCACT-CTCACCCCTC-TCAATTTTACAATTTAAGACTTGGTG-----GATTGATGGG----GTACAAGAAC      |   |   |   |   |   |   |   |   |   |   |   |   |   |   |   |   |   |   |   |   |   |   |   |
| 4_032    | TTCC-TTA--TAATTGGGAAA-TTTPGGCTAAATCTTCCCT-TTCACCCCTC-TCACTATCTACAGTTTAAACCTGGTG-----GATTGATGGG----GTACAAGAAC     |   |   |   |   |   |   |   |   |   |   |   |   |   |   |   |   |   |   |   |   |   |   |   |
| 4_052    | TTCT-TTA--TGATTGGGAAA-TTTPGGCTAAATCTTCCCT-TTCACCCCTC-TCACTATCTACAGTTTAAACCTGGTG-----GAATGATGGG----GTACAAGAAC     |   |   |   |   |   |   |   |   |   |   |   |   |   |   |   |   |   |   |   |   |   |   |   |
| 4_068    | TTCC-TTA--TAATTGGGAAA-TTTPGGCTAAATCTTCCCT-TTCACCCCTC-TCACTATCTACAGTTTAAACCTGGTG-----GATTGATGGG----GTACAAGAAC     |   |   |   |   |   |   |   |   |   |   |   |   |   |   |   |   |   |   |   |   |   |   |   |
| 4_716    | TTCC-TTA--TGATTGGGAGA-TTCTGGCAAATCGTCTCT-CTCACCCCTC-TCAATTTTACAATTTAAGACTTGGTG-----GATTGATGGG----GTACAAGAAC      |   |   |   |   |   |   |   |   |   |   |   |   |   |   |   |   |   |   |   |   |   |   |   |
| 4_742    | TTCC-TTA--TGATTGGGAGA-TTCTGGCAAATCGTCTT-TTCACCCCTC-TCAATTTGACAATTTAAGACTTGGTG-----GATTGATGGG----ACACAAGAAC       |   |   |   |   |   |   |   |   |   |   |   |   |   |   |   |   |   |   |   |   |   |   |   |
| 5_147    | TTCC-TTA--TGATTGGGAGA-TTCTGGCAAATCGTCTCT-CTCACCCCTC-TCAATTTTACAATTTAAGACTTGGTG-----GATTGATGGG----GTACAAGAAC      |   |   |   |   |   |   |   |   |   |   |   |   |   |   |   |   |   |   |   |   |   |   |   |
| 5_259    | TTCC-TTA--TGATTGGGAGA-TTTPGGCAAATCGTCTCT-CTCACCCCTC-TCAATTTTACAATTTAAGACTTGGTG-----GATTGATGGG----TAACAAGAAC      |   |   |   |   |   |   |   |   |   |   |   |   |   |   |   |   |   |   |   |   |   |   |   |
| 5_535    | TTCC-TTA--TGATTGGGAAA-TTTPGGCTAAGTCTTCCCT-TTCACCCCTC-TCACTTCTACAGTTTAAACCTGGTG-----GATTGATGGA----GTACAAGAAC      |   |   |   |   |   |   |   |   |   |   |   |   |   |   |   |   |   |   |   |   |   |   |   |
| 5_544    | TTCC-TTA--TGATTGGGAGA-TTCTGGCAAATCGTCTCT-CTCACCCCTC-TCAATTTTACAATTTAAGACTTGGTG-----GATTGATGGG----GTACAAGAAC      |   |   |   |   |   |   |   |   |   |   |   |   |   |   |   |   |   |   |   |   |   |   |   |
| 6_098    | TTCC-TTA--TGATTGGGAGA-TTTPGGCAAATCATCACT-CTCACCCCTC-TCAATTTTACAATTTAAGACTTGGTG-----AATTGATGGG----GCACAAGAAC      |   |   |   |   |   |   |   |   |   |   |   |   |   |   |   |   |   |   |   |   |   |   |   |
| 6_178    | TTCC-TTA--TGACTGGGAAA-TTTPGGCTAAATCTTCCCT-TTCACCCCTC-TCACTTCTACAGTTTAAACCTGGTG-----GATCGATGGA----GTACAAGAAC      |   |   |   |   |   |   |   |   |   |   |   |   |   |   |   |   |   |   |   |   |   |   |   |
| 6_240    | CTACATAAATAGTTAAAAA-CTATTTTAAAGGACATGTTTCACCACT-----                                                             |   |   |   |   |   |   |   |   |   |   |   |   |   |   |   |   |   |   |   |   |   |   |   |
| 6_324    | TTCC-TTA--TGATTGGGAGA-TTCTGGCAAATCGTCTCT-CTCACCCCTC-TCAATTTTACAATTTAAGACTTGGTG-----GATTGATGGG----GTACAAGAAC      |   |   |   |   |   |   |   |   |   |   |   |   |   |   |   |   |   |   |   |   |   |   |   |
| 7_345    | TTCC-TTA--TGATTGGGAGA-TTCTGGCAAATCGTCTCT-CTCACCCCTC-TCAATTTTACAATTTAAGACTTGGTG-----GATTGATGGG----GTTCAAGAAC      |   |   |   |   |   |   |   |   |   |   |   |   |   |   |   |   |   |   |   |   |   |   |   |
| 7_450    | TTCC-TTA--TGATTGGGAGA-TTTPGGCAAATGCTCTCT-CTCACCCCTC-TCAATTTTACAATTTAAGACTTGGTG-----GATTGATGGG----GCACAAGAAC      |   |   |   |   |   |   |   |   |   |   |   |   |   |   |   |   |   |   |   |   |   |   |   |
| 8_047    | TTTC-TTA--TGATTGGGAAA-TTCTGGCTAAATCTTCCCT-TTCACCCCTC-TCACTATCTCCAGTTTAAACCTGGTG-----GATTGATGGG----GTACAAGAAC     |   |   |   |   |   |   |   |   |   |   |   |   |   |   |   |   |   |   |   |   |   |   |   |
| 8_074    | TTTC-TTA--TGATTGGGAAA-TTCTGGCTATATCTTCCCT-TTCACCCCTC-TCACTATCTCCAGTTTAAACCTGGTG-----GATTGATGGG----GTACAAGAAC     |   |   |   |   |   |   |   |   |   |   |   |   |   |   |   |   |   |   |   |   |   |   |   |
| 8_094    | TTTC-TTA--TGATTGGGAAA-TTCTGGCTATATCTTCCCT-TTCACCCCTC-TCACTATCTCCAGTTTAAACCTGGTG-----GATTGATGGG----GTACAAGAAC     |   |   |   |   |   |   |   |   |   |   |   |   |   |   |   |   |   |   |   |   |   |   |   |
| 8_121    | CCCC-GCA--CGATTGGGAGA-TTTPAGCAAAGCTACTCT-TTCGCCCTC-CCAATTTCTCAATTTAAAGTGGTG-----GACCGATGAG----GCTCAA AATC        |   |   |   |   |   |   |   |   |   |   |   |   |   |   |   |   |   |   |   |   |   |   |   |
| 8_235    | CTGCATAAATAGTTAAAAA-CTATTTTAAAGGACATGTTTCACCACT-----                                                             |   |   |   |   |   |   |   |   |   |   |   |   |   |   |   |   |   |   |   |   |   |   |   |
| 8_525    | TTCC-TTA--CAATTGGGAGA-TTCTGGCAAATCGTCTCT-CTCACCCCTC-TCAATTTTACAATTTAAGACTTGGTG-----GATTGATGGG----GTACAAGAAC      |   |   |   |   |   |   |   |   |   |   |   |   |   |   |   |   |   |   |   |   |   |   |   |
| 8_559    | TTCC-TTA--TGATTGGGAAA-TTTPACCTAAATCTTCCCT-TTCACCCCTC-TCACTATCTACAGTTTAAACCTGGTG-----GATTGATGGA----GTACAAGAAC     |   |   |   |   |   |   |   |   |   |   |   |   |   |   |   |   |   |   |   |   |   |   |   |
| 9_307    | CTACATAAATAGTTAAAAA-CTATTTTAAAGGACATGTTTCACCACT-----                                                             |   |   |   |   |   |   |   |   |   |   |   |   |   |   |   |   |   |   |   |   |   |   |   |
| 9_340    | TTCC-TTA--TGATTGGGAGA-TTTPGGCAAATCATCACT-CTCACCCCTC-TCAATTTTACAATTTAAGACTTGGTG-----GATTGATGGG----ACACAAGAAC      |   |   |   |   |   |   |   |   |   |   |   |   |   |   |   |   |   |   |   |   |   |   |   |
| HML2_Rep | TTCC-TTA--TGATTGGGAGA-TTCTGGCAAATCGTCTCT-CTCACCCCTC-TCAATTTTACAATTTAAGACTTGGTG-----GATTGATGGG----GTACAAGAAC      |   |   |   |   |   |   |   |   |   |   |   |   |   |   |   |   |   |   |   |   |   |   |   |
| K113     | TTCC-TTA--TGATTGGGAGA-TTCTGGCAAATCGTCTCT-CTCACCCCTC-TCAATTTTACAATTTAAGACTTGGTG-----GATTGATGGG----GTACAAGAAC      |   |   |   |   |   |   |   |   |   |   |   |   |   |   |   |   |   |   |   |   |   |   |   |
| K115     | TTCC-TTA--TGATTGGGAGA-TTCTGGCAAATCGTCTCT-CTCACCCCTC-TCAATTTTACAATTTAAGACTTGGTG-----GATTGATGGG----GTACAAGAAC      |   |   |   |   |   |   |   |   |   |   |   |   |   |   |   |   |   |   |   |   |   |   |   |
| X_540    | CTACATAAATAGTTAAAAA-CTATTTTAAAGGACATGTTTCACCCACT-----                                                            |   |   |   |   |   |   |   |   |   |   |   |   |   |   |   |   |   |   |   |   |   |   |   |
| Y_026    | TTCC-TTA--TGATTGGGAAA-TTTPGGCTAAATCTTCCCT-TTCACCCCTC-TCAATTTCTACAGTTTAAACCTGGTA-----GATTGATGGA----GTACAAGAAT     |   |   |   |   |   |   |   |   |   |   |   |   |   |   |   |   |   |   |   |   |   |   |   |
| 94       | TTCC-TTA--TGATTGGGAGA-TTCTGGCAAAGATCATCTCT-CTCACCCCTC-TCAATTTTACAATTTAAGACTTGGTG-----GATTGATGGG----GTACAAGAAC    |   |   |   |   |   |   |   |   |   |   |   |   |   |   |   |   |   |   |   |   |   |   |   |

|          |   |
|----------|---|
| 10_019   | A |
| 10_310   | A |
| 11_233   | - |
| 11_277   | A |
| 11_424   | A |
| 11_456   | A |
| 12_216   | A |
| 12_419   | - |
| 14_023   | A |
| 16_010   | - |
| 17_029   | A |
| 19_157   | A |
| 19_238   | A |
| 19_352   | A |
| 19_407   | A |
| 19_639   | - |
| 1_059    | A |
| 1_061    | A |
| 1_259    | A |
| 1_504    | A |
| 1_555    | A |
| 20_078   | A |
| 21_019   | G |
| 22_012   | A |
| 22_041   | A |
| 2_Tan    | A |
| 3_014    | A |
| 3_209    | A |
| 3_294    | A |
| 3_354    | A |
| 3_385    | A |
| 3_496    | A |
| 3_610    | A |
| 4_008    | A |
| 4_032    | A |
| 4_052    | A |
| 4_068    | A |
| 4_716    | A |
| 4_742    | A |
| 5_147    | A |
| 5_259    | A |
| 5_535    | A |
| 5_544    | A |
| 6_098    | A |
| 6_178    | A |
| 6_240    | - |
| 6_324    | A |
| 7_345    | A |
| 7_450    | A |
| 8_047    | A |
| 8_074    | A |
| 8_094    | A |
| 8_121    | A |
| 8_235    | - |
| 8_525    | A |
| 8_559    | A |
| 9_307    | - |
| 9_340    | A |
| HML2_Rep | A |
| K113     | A |
| K115     | A |
| X_540    | - |
| Y_026    | A |
| 94       | A |

>1\_059

A-TGGCCATCAACTCCTCCTCCAGTGGTTAGATGCCTGTAACATTACAACCTCAAATGCAGGTTAGACAAGTGCAAACC  
CCAAGAGAATATCAAGTAGAAAAGGATAGAGTCTCTATCCCAGCAATGCCAATTCAGATACAGTATCCACAATATCAGCT  
GGTAGAAAATAAGACCCAACCACCGGTAGTTTATCAATACTGGCCGCCAGCTGAGCTTCAGTATGGGCTGTCTCC-GGAG  
GTTCAATACAGACCTCAAGCTGTGTGTCCCCTGCCACATAGCAC----GGCACCTCACCAGCAACCCA-----GTGGTGT  
-----TTAATCCTACATCACCACCTAGT  
GGACAAGGTAGTACTGCATGAAATCATTGATAAA-----GCCAGAAAACAGGGAGA--TCGTGAGGCATGGCA  
GTTCCCTGTAAATTTTACAACCAATACCAGCTGGGAAAAGG-----GGCAAGCTGGAGCGTCTGTCCAAACTGA  
GGCTAGATATGAATCTTACCATGAAAATGTT-AAAAGATATGAAGGAAGGAGTTA--ACAATATGGACCCAACCTCCC  
CTTATATGAGAACTTTATTAGATTCATTGCTCATGGAAAT--AGACTTATTC-CTA--TGATTGGGAAA-CGTTGGC  
TAAATCTTCCCT-TTACCCTC-TCAGTTCTTACAATTTAAAACCTGGTG-----GATTGATGGA-----GTAC  
AAGAACA

>1\_061

A-TGGCCATCAACTCCTCCTCCAGCGGTTAGATGCCTGTAACATTACAACCTCAAATGCAGGTTAGACAAGTGCAAACC  
CCAAGAGAATATCATGTAGAAAAGGATAGAGTCTCTATCCCAGCAATGCCAATTCAGATACAGTATCCACAATATCAGCT  
GGTAGAAAATAAGACCCAACCACCGGTAGTTTATCAATACTGGCCGCCAGCTGAGCTTCAGTATGGGCGTCTCC-GGAG  
GTTCAATACAGACCTCAAGCTGTGTGTCCCCTGCCACACAGCAC----GGCACCTCACCAGCAACCCA-----GCGGTGT  
-----TTAGTCTTACATCACCACCTAGT  
GGACAAGGTAGTACTGCATGAAATCATTGATAAA-----GCCAGAAAACAGGGAGA--TCGTGAGGCATGGCA  
GTTCCCTGTAAATTTTACAACCAATACCAGCTGGGAAAAGG-----GGCAAGCTGGAGCGTCTGTCCAAACTGA  
GGCTAGATATGAATCTTACCATGAAAATGTT-AAAAGATATGAAGGAAGGAGTTA--ACAATATGGACCCAACCTCCC  
CTTATATGAGAACTTTATTAGATCCATTGCTCATGGAAAT--AGACTTATTC-CTA--TGATTGGGAAA-TGTTGGC  
TAAATCTTCCCT-TTACCCTC-TCAGTTCTTACAATTTAAAACCTGGTG-----GATTGATGGA-----GTAC  
AAGAACA

>1\_259

A-GGCAC---AAGTCTCTTCCAGCAGGTCAGGTGCCCGTAAGATTACAACCTCAAACGCAGGTTAA-----  
-----  
---AGAAAATAAGACCCAACCGCCAGTAGCTTATCAATACTGGCCGCCGGCTGAACTTCAGTATCGGCCACCCCC-AGAA  
AGTCAGTATGGATATCCAGGAATGCCCCAGCACCACAGGGCAG----GGCGCCATACCCTCAGCTGCCACCTAGGAGAC  
-----TTAATCCTATGGCACCACCTAGT  
AGACAGGGTAGTGAATTACATGAAATCATTGATAAA-----TCAAGAAAGGAAGGAGA--TACTGAGGCATGGCA  
ATTCCCAGTAACGTTAGAACCAATGCCACCTGGAGAAGGA-----GCCAAGAGGGAGAGCCTCCCACAGTTGA  
GGCCAGATACAAGTCTTTTTCGATAAAAATGCT-AAAAGATATGAAAGAGGGAGTAA--AACAGTATGGACCCAACCTCTC  
CTTATATGAGGACATTTATTAGATTCATTGCTCATGGACAT--AGACTCATTC-CTA--TGATTGGGAGA-TTCTGGC  
AAAATCGTCTCT-CTCACCTC-TCAATTTTACAATTTAAGACTTGGTG-----GATTGATGGG-----GTAC  
AAGAACA

>1\_504

A-GGCAC---AAGTCATCTTCCAGCAGGTCAGGTGCCCGTAACATTACAACCTCAAAGCAGGTTAA-----  
-----  
---AGAAAATAAGACCCAACCGCCAGTAGCCTATCAATACTGGCCCTCCGGCTGAACTTCAGTATCGGCCACCCCC-AGAA  
AGTCAGTATGGATATCCAGGAATGCCCCAGCACCACAGGGCAG----GGCGCCATACCCTCAGCCGCCACTAGGAGAC  
-----TTAATCCTACGGCACCACCTAGT  
AGACAGGGTAGTGAATTACATGAAATCATTGATAAA-----TCAAGAAAGGAAGGAGA--TACTGAGGCATGGCA  
ATTCCCAGTAACGTTAGAACCGATGCCACCTGGAGAAGGA-----GCCAAGAGGGAGAGCCTCCCACAGTTGA  
GGCCAGATACAAGTCTTTTTCGATAAAAATGCT-AAAAGATATGAAAGAGGGAGTAA--AACAGTATGGACCCAACCTCCC  
CTTATATGAGGACATTTATTAGATTCATTGCTCATGGACAT--AGACTCATTC-CTA--TGATTGGGAGA-TTCTGGC  
AAAATCGTCTCT-CTCACCTC-TCAATTTTACAATTTAAGACTTGGTG-----GATTGATGGG-----GTAC  
AAGAACA

>1\_555

A-GGGCC---AAGTCTCTTTCCAGCAGGTCAGGTGACCGTAACATTACAACCTCAAAGCAGGTTAG-----  
-----  
---AGAAAATAAGACCCAACCGCCAGTAGCCTATCAATACTGGCCACCGCCGAACTTCAGTATCGGCCACCCCC-AGAA  
AGTCAGTATGGATATCTAGGAATGCCCCAGCACCACAGGGCAG----GGAGCCATACCCTCAGCCGCCACTAGGAGAC  
-----AATCCTATGGCACCACCTAGT  
AGACAGGGTAGTGAATTACATGAAATCATTGAGAAG-----TCAAGAAAGGAAGGAGA--TACTGAGGCGTGGCA  
ATTCCCAGTAACGTTAGAACCGATGCCACCTGGAGAAGGA-----GCCAAGAGGGAGAGCCTCTCACAGTTGA  
GGCCAGATACAAGTCTTTTTCGATAAAAAGCT-AAAAGATATGAAAGAGGGAGTAA--AACAGTATGGACCCAACCTCCC  
CTTATATGAGGACATTTATTAGATTCATTGCTCATGGACAT--AGACTCATTC-CTA--TGATTGGGAGA-TTCTGGC  
AAAATCGTCTCT-CTCACCTC-TCAATTTTACAATTTAAGACTTGGTG-----AATTGATGGG-----GCAC  
AAGAACA

>2\_Tan

A-GGCAC---AAGTCTCTTCCAGCAGGTCAGGTGCTGTAACATTACAACCTCAAAGCAGGTTAA-----  
-----  
---AGAAAATAAGACCCAACCGCCAGTAGCCTATCAATACTGGCCCTCCGGCTGAACTTCAGTATCGGCCACCCCC-AGAA  
AGTCAGTATGGATATCCAGGAATGCCCCAGCACCACAGGGCAG----GGCGCCATACCCTCAGCCGCCACTAGGAGAC  
-----TTAATCCTACGGCACCACCTAGT  
AGACAGGGTAGTAAATACATGAAATCATTGATAAA-----TCAAGAAAGGAAGGAGA--TACTGAGGCATGGCA  
ATTCCCAGTAACGTTAGAACCGATGCCACCTGGAGAAGGA-----GCCAAGAGGGAGAGCCTCCCACAGTTGA  
GGCCAGATACAAGTCTTTTTCGATAAAAAGCT-AAAAGATATGAAAGAGGGAGTAA--AACAGTATGGACCCAACCTCCC  
CTTATATGAGGACATTTATTAGATTCATTGCTCATGGACAT--AGACTCATTC-CTA--TGATTGGGAGA-TTCTGGC  
AAAATCGTCTCT-CTCACCTC-TCAATTTTACAATTTAAGACTTGGTG-----GATTGATGGG-----GTAC  
AAGAACA

>3\_014

A-GGGAC---AAGTCTCTTCCAGCAGGTCAGATGCCCGTAACATTACAACCTCAAACACAGGTTAG-----  
-----  
---AGAAAATAAGACCCAACCGCCAGTAGCCTATCAATACTGGCTGCCGGCTGAACTTCAGTATCGGCCACCCCC-AGAA

AGTCAGTATGGACATCCAGGAATGCTCCAGCACCACAGGGCAG----GGCGCCATACCCTCAGCCGCCACTATGAGAC  
-----TTAATCCTACAGCACCACCTAAT  
AGACAGGGTAGTGCATTACATAAAAATTATTGATAAG-----TCAAGAAAGCAAGGAGA--TATTGAGGCGTGGCC  
ATTCCTACTAATGTTAGAACTGATACCACCTGGAGAAGGA-----GCCAAGAGGGAGAGCCTCCCACAGTTGA  
GGCCAGATACAAGTCTTTTTCTATAAAAATGCT-AAAAGACATGAAAGAGGGAAATAA--AACAGTATGGACCCAACTCCC  
CTTATATGAGGACATTATTAGATTCCATTGCACACGGACAT--AGACTCATTC--TTA--TGATTGGGAGA--TTCTGGC  
AAAATCGTCTCT-CTCACCTC-TCAATTTTTACAATTTAAGATTGGTG-----GATTAATGGG-----GCAC  
AGAACA

>3\_209

A-TGGCCACCATCTCTTCTCCCGCGGTTTCAGATACCTGTGACATCACAATCTCAA-----  
-----TGCTAATCCAGGCACAGTATCCACAATAGCAGGC  
AGTAGAAAATAAAACCCAACCATCGGTAGTTTATCAACACCAGCCGCCAGCGAATTTTCAGTATCGGCCGTCTCC-AGAG  
GTTTCAGTATGGATCTCAGGTGGTGGTCTCTGTCTAAATAGCAA----GACACTATATCAACAACCCACGGCGATGGCGT  
-----TTGATCCTACAGCACCACCTAGT  
GGACAAGATGGTGCATGACATGAGACCATTGCTACA-----GCCAGAAAACAGGGAGA--TCTTGAGGCATGGCA  
GTATCCGGTAATTTTACAACCCATACCGGCCAGAAAAGGG-----AGTCAAACAGGAGCATCTGTCTGAACTGA  
GGCTAGATATGAATCTTTCACCATGAAAATGTT-AAAAAATTTAAAGGAAGGATTTA--ACAATATGGACCCAACTGTC  
CTTATATGAGAACATTATTAGATTCCATTGCTCATGGAAAT--AGACTTATTC--TTA--AGATTGGGAAA-TTTTGGT  
TAAATCTTCCCT-CTCACCTC-TCAGTATCTACAGTTTAAACCTGGTG-----GATTGATGGG-----GTAC  
AGAACA

>3\_294

A-GGGCC---AAGTCTCTTCCAGCAGGTCAGGTGCCCGTAACATTACAACCTCAAACGCAGGTTAA-----  
-----  
---AGAAAATAAGACCCAACCGCCAGTAGCTTATCAATACTGGCCGCCGGCTGAACTTCAGTATCTGCCACCCCC-AGAA  
AGTCAGTATGGATATCCAGGAATGCCCCAGCACACAGGGCAG----GGCGCCATATCCTCAGCCGCCACTGTGAGAC  
-----TTAATCCTACAGCATCAGTAGT  
GGACAAGTGGTACACTGCACGCAGTCATTGATGAA-----GCCAGAAAACAGGGAGA--TCTTGAGGCATGGCG  
GTTCCGGTAATTTTACAACCTGGTACAGGCCGGGGAAGAG-----ACTCAAGTAGGAGCGCCTGCCGAGCTGA  
GACTAGATGTGAACCTTTCACCATGAAAATGTT-AAAAGATATAAAGGAAGGAGTTA--ACAATATGGATCCAACCTCCC  
CTTATATAAGAACATTATTAGATTCCATTGCTCATGGAAAT--AGACTTACTCC--TTA--TGACTGGGAAA-GTTTGGC  
CAAATCTTCCCT-TTCATCCTC-TCAGTATCTACAGTTTAAACCTGGTG-----GATTGATGGA-----GTAC  
AGAACA

>3\_354

A-GGCAC---AAGTCATCTTCCAGCAGGTCAGGTGCCCGTAACATTACAACCTCAAAGCAGGTTAA-----  
-----  
---AGAAAATAAGACCCAACCGCCAGTAGCCTATCAATACTGGCCGCCGGCTGAACTTCAGTATCGGCCACCCCC-AGAA  
AGTCAGTATGGATATCCAGGAATGCCCCAGCACACAGGGCAG----GGCGCCATACCCTCAGCCACCACCTAGGAGAC  
-----TTAATCCTACGGCACCACCTAGT  
AGACAGGGTAGTGAATTACATGAAATATTGATAAA-----TCAAGAAAGGAAGGAGA--TACTGAGGCATGGCA  
ATTCACAGTAACGTTAGAACCGATGCCACCTGGAGAAGGA-----GCCAAGAGGGAGAGCCTCCCACAGTTGA  
GGCCAGATACAAGTCTTTTTCGATAAAAATGCT-AAAAGATATGAAAGAGGGAGTAA--AACAGTATGGACCCAACTCCC  
CTTATATGAGGACATTATTAGATTCCATTGCTCATGGAAAT--AGACTTACTCC--TTA--TGACTGGGAAA-GTTTGGC  
AAAATCGTCTCT-CTCACCTC-TCAATTTTTACAATTTAAGACTTGGTG-----GATTGATGGA-----GTAC  
AGAACA

>3\_385

A-GGCAC---AAGTCTCTTCCAGCAGGTCAGGTGCCCGTAACATTACAACCTCAAATGCAGGTTAA-----  
-----  
---AGAAAATAAGACCCAACCGCCAGTAGCCTATCAATACTGGCCGCCGGCTGAACTTCAGTATCGGCCACCCCC-AGAA  
AGTCAGTATGGATATCCAGGAATGCCCCAGCACACAGGGCAG----GGCGCCATACCCTCAGCTGCCACTAGGAGAC  
-----TTAATCCTATGGCACCACCTAGT  
AGACAGGGTAGTGAATTACATGAAATATTGATAAA-----TCAAGAAAGGAAGGAGA--TACTGAGGCGTGGCA  
ATTCACAGTAACATTAGAACCGATGCCAAGCTGGAGAAGGA-----GCCAAGAGGGAGAGCCTCCCACAGTTGA  
GGCCAGATACAAGTCTTTTTCGATAAAAATGCT-AAAAGATATGAAAGAGGGAGTAA--AACAGTATGGACCCAACTCCC  
CTTATATGAGGACATTATTAGATTCCATTGCTCATGGACAT--AGACTCATTC--TTA--TGATTGGGAGA--TTCTGGC  
AAAATCGTCTCT-CTCACCTC-TCAATTTTTACAATTTAAGACTTGGTG-----GATTGATGGA-----GTAC  
AGAACA

>3\_496

A-GGGCC---AAGTCTCTTCCAGCAGGTCAGGTGCCCGTAACATTACAACCTCAAAGCAGATTAA-----  
-----  
---AGAAAATAAGACCCAACCGCCAGTAGCCTATCAATACTGGCCGCCGGCTGAACTTCAGTATCGGCCACCCCC-AGAA  
AGTCAGTATGGATATCCAGGAATGCCCCAGCACACAGGGCAG----GGCGCCATACCCTCAGCCGCCACTAGGAGAC  
-----TTAATCCTACGGCACCACCTAGT  
AGACAGGGTAGTGAATTACATGAAATATTGATAAA-----TCAAGAAAGGAAGGAGA--TACTGAGGCATGGCA  
ATTCACAGTAACGTTAGAACCGATGCCACCTGGAGAAGGA-----GCCAAGAGGGAGAGCCTCCCACAGTTGA  
GGCCAGATACAAGTCTTTTTCGATAAAAATGCT-AAAAGATATGAAAGAGGGAGTAA--AACAGTATGGACCCAACTCCC  
CTTATATGAGGACATTATTAGATTCCATTGCTCATGGACAT--AGACTCATTC--TTA--TGATTGGGAGA--TTCTGGC  
AAAATCGTCTCT-CTCACCTC-TCAATTTTTACAATTTAAGACTTGGTG-----GATTGATGGA-----GTAC  
AGAACA

>3\_610

A-GGCAC---AAGTCTCTTCCAGCAGGTCAGGTGCCCGTAACATTACAACCTCAAACGCAGGTTAA-----  
-----  
---AGAAAATAAGACCCAACCGCCAGTAGCCTATCAATACTGGCCACCAGGCTGAACTTCAGTATCGGCCACCCCC-AGAA  
AGTCAGTATGGATATCCAGGAATGCCCCAGCACACAGGGCAG----GGCGCCATACCCTCAGCCGCCACTAGGAGAC  
-----TTAATCCTACGGCACCACCTAGT  
AGACAGGGTAGTGAATTACATGAAATATTGATAAA-----TCAAGAAAGGAAGGAGA--TACTGAGGCATGGCA  
ATTCACAGTAACGTTAGAACCGATGCCACCTGGAGAAGGA-----GCCAAGAGGGAGAGCCTCTCACAGTTGA

GGCCAGATACAAGTCTTTTTCGATAAAAATGCT-AAAAGATATGAAAGAGGGAGTAA--AACAGTATGGACCCAACTCCC  
CTTATATGAGGACATATTAGATTCCATTGCTCATGGACAT---AGACTCATTC- TTA--TGATTGGGAGA--TTCTGGC  
AAAATCGTCTCT-CTCACCTC-TCAATTTTACAATTTAAGACTTGGTG-----GATTGATGGG-----GTAC  
AAGAACA

>4\_008

-----  
-----  
-----  
-----CAGCAACCCACGGCGGTGGCGC  
-----TTAATCCTACAGCACCACCTAGT  
GGACAATGTAGCACACTGTATGAAATCATTGATTAA-----GCCAGAAAACAGGGAGA--TCTTGAGGCATGGCA  
GTTCCAGTAATTTTACAACCGGTACCAGCCGGGGAAAGAG-----ACAAGTAGGAGTGCCTACCCAAGCTGA  
GGTAGATATGAATCTTTCACCCTGAAAATGTT-AAAAGATATGAAGAAAGGAGTTATAAACAAATATGGACCCAACTCCC  
CTTACATGAGAACATATTAGATTCCATTGCTCATGGAAAT---AGACTTATTC- TTA--TGATTGGGAAA--TTTTGGC  
TAAATCTTCCCT-TTCACCCTC-TCA---TTTACAGTTTAAAACCTGGTG-----GATTGATGGAATGGAGTAC  
AAGAACA

>4\_032

A-TGGCCACCAACCCCTTCTCCCGCGGTTTCAGATGCCTGTGATGTCACAATCTCAA-----  
-----TGCCAATCCAGGCACAGTATCCGCAATACCAGCC  
CGTAGAAAATAAA-CCCAACCATCGGTAGTTTATCAACACCAGCCGCCAGCCGATTTTCAGTATCCGCCGTCTCC-AGAG  
GTTTCAGTATGGATCTCAGGCGGTGCGTCTGTGCCAATAGCAA---GGCACTATATCAACAACCCACGGCGATGGCGT  
-----TTGATCTTACAGTACCACCTAGT  
GGACAAGATAGTGCCTGCATGAGACCATTGCTACA-----GCCAGAAAACAGGGAGA--TCTTGAGGCATGGCA  
ATATCCGGAATGTTACAACCGGTGCCGGCCGGGAAAGGG-----AGTCAAGCAGGAGCGTCTGTCTGAACCTGA  
GACCAGATATGAATCTTTCACCACAAAATGTT-AAAAGATATGAAGAAAGGAGTTA--AACAAATATGGACCTAACTCTC  
CTTATATGAGAACATATTAGATTCCATTGCTCATGGAAAT---AGACTTATTC- TTA--TAATTGGGAAA--TTTTGGC  
TAAATCTTCCCT-TTCACCCTC-TCAGTATCTACAGTTTAAAACCTGGTG-----GATTGATGGG-----GTAC  
AAGAACA

>4\_052

A-TGGCCACCAACCTCTTCTCCCGCGGTTTCAGATGCCTTTGATGTCACAATCTCAA-----  
-----TGCCAATCCAGGCACAGTATCCGCAATACCAGCC  
AGTAGAAAATAAAACCCCAACCATCGGTAGTTTATCAACACAAGCCGTCAGCCGATTTTCAGTATCCGCCGTCTCC-AGAG  
GTTTCAGTATGGATCTCAGGCGGTGCGTCTGTGCCAATAGCAA---GGCACTATATCAACAACCCACGGCGATGGCGT  
-----TTGATCTTACAGTACCACCTAGT  
GGACAAGGATAGTGCCTGCATGAGACCATTGCTACA-----GCCAGAAAACAGGGAGA--TCTTGAGGCATGGCA  
ATATCCGGAATGTTACAACAATGCCGGCCGGGAAAGGG-----AGTCAAGCAGGAGCGTCTGTCTGAACCAA  
GACTAGATATGAATCTATCACCATAAAAAAATTTAAAAGATATGAAGAAAGGAGTTA--AACAAATATGGACCTAACTCTC  
CTTATATGAGAACATATTAGATTCCATTGCTCATGGAAAT---AGACTTATTC- TTA--TGATTGGGAAA--TTTTGGC  
TAAATCTTCCCT-TTCACCCTC-TCAGTATCTACAGTTTAAAACCTGGTG-----GAATGATGGG-----GTAC  
AAGAACA

>4\_068

A-TGGCCACCAACCCCTTCTCCCGCGGTTTCAGATGCCTGTGATGTCACAATCTCAA-----  
-----TGCCAATCCAGGCACAGTATCCGCAATACCAGCC  
AGTAGAAAATAAA-CCCAACCATCGGTAGTTTATCAACACCAGCCGCCAGCCGAATTTTCAGTATCCGCCGTCTCC-AGAG  
GTTTCAGTATGGATCTCAGGAGGTGCGTCTGTGCCAATAGCAA---GGCACTATATCAACAACCCACGGCGATGGCGT  
-----TTGATCTTACAGTACCACCTAGT  
GGACAAGATAGTGCCTGCATGAGACCATTGCTACA-----GCCAGAAAACAGGGAGA--TCTTGAGGCATGGCA  
ATATCTGGTAATGTTACAACCGATGCCGGCCGGGAAAGGG-----AGTCAAGCAGGAGCGTCTGTCTGAACCAA  
GACCAGATATGAATCTTTCACCACAAAATGTT-AAAAGATATGAAGAAAGGAGTTA--AACAAATATGGACCTAACTCTC  
CTTATATGAGAACATATTAGATTCCATTGCTCATGGAAAT---AGACTTATTC- TTA--TAATTGGGAAA--TTTTGGC  
TAAATCTTCCCT-TTCACCCTC-TCAGTATCTACAGTTTAAAACCTGGTG-----GATTGATGGG-----GTAC  
ATGAACA

>4\_716

A-GGGCC---AAGTCTCTTTCAGCAGGTGAGGTGCCCGTAACATTACAACCTCAAAGCAGGTTAA-----  
-----  
---AGAAAATAAGACCCAACCGCCAGTAGCTTATCAATACTGGCCGCCGGCTGAACCTCAGTATCGGCCACCCCT-AGAA  
AGTCAGTGTGGATATCCAGGAATGCCCCAGCACCACAGGGCAG---GGCGCCATACCCTCAGCCGCCACTTAGGAGAC  
-----TTAATCCTACGGCACCACCTAGT  
AGACAGGGTAGTGAATTACATGAAATATTGATAAA-----TCAAGAAAGGAAGGAGA--TACTGAGGCATGGCA  
ATTCCAGTAACGTTAGAACCGATGCCACCTGGAGAAGGA-----GCCAAGAGGGAGAGCCTCCCACAGTTGA  
GGCCAGATACAAGTCTTTTTCGATAAAAATGCT-AAAAGATATGAAAGAGGGAGTAA--AACAGTATGGACCCAACTCCC  
CTTATATGAGGACATATTAGATTCCATTGCTCATAGACAT---AGACTCATTC- TTA--TGATTGGGAGA--TTCTGGC  
AAAATCGTCTCT-CTCACCTC-TCAATTTTACAATTTAAGACTTGGTG-----GATTGATGGG-----GTAC  
AAGAACA

>4\_742

A-GAGCC---AAGTCTTTTCTAGCAGGTGAGATGCCATAACATTACAACCTCAAACGCAGGTTAG-----  
-----  
---AGAAAATAAGACCCAACCACCTAGCTTATCAATACTGGCCACTGGCTGAACCTCAGTATCAGCCACCCCT-AGAA  
AGTCAGTATGGACATCCAGGAATGCTGCCAGCACTACAGAATAG---GGTGCCACACCTCAGCCGCCACTTTGAGAC  
-----TTAATCCTATGGCACCACCTAGT  
AGACAGGGTAGTGCATTACATAAAAATATTGTCAGAAAATTTAGTCAAGAAAGCAAGGAGA--TACTGAGGTGTGGCA  
ATTCCAGTAATGTTGGAACCTGATGCCACCTGGAGAAGGG-----GCCAAGAGGGAGAGCCTCCCACAGTTGA  
GGCCAGATACAAGTCTTTTTCATATAAAAATGCT-AAAAGATAGGAAAGACGGAGTCA--AACAGTATGGACCCAACTCCC  
CTTACATGAGGACATATTAGATTCCATTGCTCATAGACAT---AGACTCATTC- TTA--TGATTGGGAGA--TTCTGGC  
AAAATCGTCTTT-CTCACCTC-TCAATTTGTACAATTTAAGACTTGGTG-----GATTGATAGG-----ACAC  
AAGAACA

>5\_147

A-GGCAC---AAGTCTCTTCCAGCAGGTGAGTGCCTGTAACATTACAACCTCAAACGCAGGTAA-----  
-----  
---AGAAAATAAGACCCAACCGCCAGTAGCCTATCAATACTGGCTGCCGGCTGAACTTCAGTATCGGCCACCCCC-AGAA  
AGTCAGTATGGATATCCAGGAATACCCCCAGCACCACAGGGCAG----GGTGCCATACCCCTCAGCCGCCACTAGGAGAC  
-----TTAATCCTATGGCACCACCTAGT  
AGACAGGGTAGTGAATTACATGAAATATTGATAAA-----TCAAGAAAGGAAGGAGA--TACTGAGGCATGGCA  
ATTCCCAGTAACGTTAGAACCAGTGCACCTGGAGAAGGA-----GCCAAGAGGGAGAGCCTCTCACAGTTGA  
GGCCAGATACAAGTCTTTTTCGATAAAAAATGCT-AAAAGATATGAAAGAGGGAGTAA--AACAGTATGGACCCAACTCCC  
CTTATATGAGGACATTATTAGATTCCATTGCTCATGGACAT--AGACTCATTC-TTA--TGATTGGGAGA-TTCTGGC  
AAAATCGTCTCT-CTCACCTC-TCATTTTTTACAATTTAAGACTTGGTG-----GATTGATGGG-----GTAC  
AGAACA

>5\_259

A-GCACC---AAGCCCTCTTCCAGCAGGTGAGATGCCTGGAACATTACAGTCTCCAATGCAGGTAG-----  
-----  
---AGAAAATAAGACCCAACCACCAGTAGCTTAGCAATACTGGCCACTGGCCAACTTCAGCATCAGCCATCCCC-AGAA  
AGTCAGTATGGACATTCAGGAATGCTCCAGCACCACAGGGCAG----GGAGCCATACCCCTCAGCCACCCTATGACAC  
-----TTAATCCAACAGCACCACCTAGT  
CAACAGGGTAGTGCCTTACATAAAATATTGATAAT-----TCAAGAAACCAAGGAGA--TATTGAGGCATGGCA  
ATTCCCAGTAACGTTAGAACCAATACCACCTGGAGAAGGG-----GCCAAGAGGGAGAGCCTCAAACAGTTGA  
GGCCAGATATGAGTCTTTTTCGATAAAAAATGCT-GAAAGATATGAAAGAGGGAGTAA--AACAGTATGGACCCAACTTCC  
CTTATATGAGGACATTATTAGACTCCATTGCTCATGGTCAAT--AGACTCATTC-TTA--TGATTGGGAGA-TTTTGGC  
AAAATCGTCTTC--TCACCCTC-TCAATTTTTTACAATTTAAGACTTGGTG-----GATTGATGGG-----TAAC  
AGAACA

>5\_535

A-CGGCCATCAACTCCTCCTCCTGCGGTTGAGATGCCTGTGACATTACAACCTCAAATGCAGGTTAGACAAGTACAACT  
GCAAGAGAATATCAAGTAGAAAAGGATAGAGTCTCTATCCCAGCAATGCCAATCCAGACACAGTATCCACAATATCAGCT  
GGTAGAAAATAAAACCCAACCCTGGTAGTTTATCAATACTGGCCGCCAGTCAAATTTTCAGTATCAGCTGCTTCC-AGAG  
GTTTCAGTATAGATCTCAGGCGGGGTGCTCTGCCAAATAGCAG----GGCATTATATCAGCAACCCACAGCGATGGCGT  
-----TTGATCCTACAGCACCACCTAGT  
GTACAAGATAGTACTGCATAAAACCATT----A-----GCCAGAAAACAGGGAGA--TCTTGAGGCATGGCA  
GTACCCGGTAATTTTACAACCGATACTGGCTGGGAAAGGG-----AGTCAAGCAGGAGCCTCTGTCCAACTGA  
GATTAGATATGAATCTTTCACCTGAAAATGTT-AAAAGATATGAAGGAAGGAGTTA--ACAATATGGACCCAACTCTC  
CTTATATGAGAACATTATTAGATTCCATTGCTCATGGAAAT--AGACTTATTC-TTA--TGATTGGGAAA-TTTTGGC  
TAAGTCTTCCCT-TTCACCCTC-TCAGTTTCTACAGTTTAAACCTGGTG-----GATTGATGGA-----GTAC  
AGAACA

>5\_544

A-GGCAC---AAGTCTCTTCCAGCAGGTGAGTGCCTGTAAGATTACAACCTCAAAGCAGGTAA-----  
-----  
---AGAAAATAAGACCCAACCGCCAGTAGCCTATCAATACTGGCCGCGGCTGAACTTCAGTATCGGCCACCCCC-AGAA  
AGTCAGTATGGATATCCAGGAATGCCCCAGCACCACAGGGCAG----GGCGCCATACCATCAGCCGCCACTAGGAGAC  
-----TTAATCCTATGGCACCACCTAGT  
AGACAGGGTAGTGAATTACATGAAATATTGATAAA-----TCAAGAAAGGAAGGAGA--TACTGAGGCATGGCA  
ATTCCCAGTAACGTTAGAACCAGTGCACCTGGAGAAGGA-----GCCAAGAGGGAGAGCCTCCCACAGTTGA  
GGCCAGATACAAGTCTTTTTCGATAAAAAATGCT-AAAAGATATGAAAGAGGGAGTAA--AACAGTATGGACCCAACTCCC  
CTTATATGAGGACATTATTAGATTCCATTGCTCATGGACAT--AGACTCATTC-TTA--TGATTGGGAGA-TTCTGGC  
AAAATCGTCTCT-CTCACCTC-TCAATTTTTTACAATTTAAGACTTGGTG-----GATTGATGGG-----GTAC  
AGAACA

>6\_098

A-TGGCC---AACTCTCTTCCAGCAGTTCAGATGCCTGTAACATTGCAACCTCAAATGCAGGTTAGACAAGTACAAACC  
CCAGAAGAATATCAAATAGAAAAGATAAAGTCTCTGCCATGGCAATGCCAATCCAGATACAGTATCCACAATATCAGCA  
GGTAGAAAATAAGACCCAACCTGCCAGTAGCCTATCAATACTGGCCGCGGAGCCTTCAGTATCGGCCGCCCC-AGAA  
AATCAGTATGGACACCCAGGAATGTTCCAGCACCACAGGGCAG----GGCTCTAGATCCTCAGCCGCTCCACTGTGAGAC  
-----TTAATCCTACAGCACCACCTAGT  
GGACAGCATAGTGCATTACATAAAATATTGATAAG-----GCAAGAAAACAAGGAGA--TACTGAGGCGTGACA  
ATTCCCAGTAACATTAGAAGTATACACCTGGAGAAGGG-----GCCAAGAGGGAGTGCCTCCCCTAGCTGA  
GGCCAGATATGAGTCTTTTTCGATAAAAAATGCT-AAAAGATATGAAAGAGGGAGTAA--AACAGTATGGACCCAGCTCCC  
CTTATATGAAAATATTATTAGATTCCATTGCTCATGGACAT--AGACTCATTC-TTA--TGATTGGGAGA-TTTTGGC  
CAAATCATCACT-CTCATCCTC-TCAATTTTTTACAATTTAAGACTTGGTG-----AATTGATGGG-----GCAC  
AGAACA

>6\_178

A-TGGCCATCAA---CTCCTCCCGTGGTTGAGATACCTGTAACATTACAACCTCAAAGGGAGGTTAGACAAGTACAAACC  
CCAAGAGAATATCAAGTAGAAAAGGATAGAGTCTCTATCCCAGCAATGCCAATCCAGATGCAGTATCCACAATATAAGCT  
GGTAGAAAATAAGACCCAACCACCAGTAATTTATCAGTACTGGCCGCGGAGCCTTCAGTATCGGCCACCTCC-AGAG  
GTTAAATACAGACCTCAAGTGGTGTCTCTGTGCCAAATAGCAC----GGCACCATACCAGCAACCCACGGCAGTGGTGT  
-----TTAATCCTACCGCACCACCTAGT  
GGACAAGGTAGTACTGCATGAAATATTGATAAA-----GCCAGTAAACAGGGAGA--TCTTGAGGCATGGGA  
GTTCCCGGTAATTTTACAACCGATAACCGCCGGGAAAGGG-----ACTTAGCAGGAGCGTCTGTCCAACTGA  
AGCTAGATATGAATCTTTCACCATGAAAATGTT-AAAAGATATGAAGGAAGGAGTT-----AATATGGACCCAACTCCC  
CTTATGTGAGAACATTATTAGATTCCATTGTTTCATGGAAAT--AGACTTATTC-TTA--TGACTGGGAAA-TTTTGGC  
TAAATCTTCCCT-TTCACCCTC-TCAGTTTCTACAGTTTAAACCTGGTG-----GATCGATGGA-----GTAC  
AGAACA

>6\_240

-----  
-----  
-----

-----  
-----GGCCATT-GGGGC-----TAAAACCACAATG  
GCCACA--TCCTCCTCAGCCAAGTGATTGCTGGGGGAGGG-----AGCTGAAACTAGGCTCGCTGTGACTTGG  
CTCGCAGCACTCATTATTGCCCAACCTACAGCT-----CACTACAATGAAGGAGCAA--TTCAGACTCACCCTCAGTGT  
CCTGTATGGGTCAAACAGTGG---CCGCTCTCTAAGGAAAAGTTGGGTGTGCTACATAAAATAGTTAAAAA--CTATTTT  
AAAAAGGACATGTTTCACACACT-----  
-----

>6\_324

A-GGCAC---AAGTCTCTTCCAGCAGGTCAGGTGCCTGTAACATTACAACCTCAAAGCAGGTAA-----  
-----  
---AGAAAATAAGACCCAACCGCCAGTAGCCTATCAATACTGGCCTCCGGCTGAACTTCAGTATCGGCCACCCCC-AGAA  
AGTCAGTATGGATATCCAGGAATGCCCCAGCACACAGGGCAG----GGCGCCATACCCTCAGCCGCCACTAGGAGAC  
-----TTAATCCTACGGCACCACCTAGT  
AGACAGGGTAGTGAATTACATGAAATTATTGATAAA-----TCAAGAAAGGAAGGAGA--TACTGAGGCATGGCA  
ATTCACAGTAACGTTAGAACCAGTGCACCTGGAGAAGGA-----GCCAAGAGGGAGAGCCTCCCACAGTTGA  
GGCCAGATACAAGTCTTTTTCGATAAAAAACT-AAAAGATATGAAAGAGGGAGTAA--AACAGTATGGACCCAACCTCCC  
CTTATATGAGGACATTATTAGATTCATTGCTCATGGACAT--AGACTCATTC- TTA--TGATTGGGAGA--TTCTGGC  
AAAATCGTCTCT-CTCACCTC- TCAATTTTACAATTTAAGACTTGGTG-----GATTGATGGG-----GTAC  
AAGAACA

>7\_345

A-GGCAC---AAGTCTCTTCCAGCAGGTCAGGTGCCTGTAACATTACAACCTCAAAGCAGGTAA-----  
-----  
---AGAAAATAAGACCCAACCGCCAGTAGCCTATCAATACTGGCCGCGGCTGAACTTCAGTATCGGCCACCCCC-AGAA  
AGTTAGTATGGATATCCAGGAATGCCCCAGCACACAGGGCAG----GGCGCCATACCCTCAGCCGCCACTAGGAGAC  
-----TTAATCCTACGGCACCACCTAGT  
AGACAGGGTAGTGAATTACATGAAATTATTGATAAA-----TCAAGAAAGGAAGGAGA--TACTGAGGCATGGCA  
ATTCACAGTAACGTTAGAACCAGTGCACCTGGAGAAGGA-----GCCAAGAGGGAGAGCCTCTCAGATTGA  
GGCCAGATACAAGTCTTTTTCGATAAAAAAGTCT-AAAAGATATGAAAGAGAGAGTAA--AACAGTATGGACCCAACCTCCC  
CTTATATGAGGACATTATTAGATTCATTGCTCATGGACAT--AGACTCATTC- TTA--TGATTGGGAGA--TTCTGGC  
AAAATCGTCTCT-CTCACCTC- TCAATTTTACAATTTAAGACTTGGTG-----GATTGATGGG-----GTTC  
AAGAACA

>7\_450

A-GGGCC---AACTCTCTTCCAGCAGTTCAGATGCCTGTAACATTACAACCTCAAATGCAGGTTAGGCAAGTACAAACC  
CCAAGAGAATATCAAATAGAGAAAGATAGAGTCTCTGTACGGCAATGCCAATCAAATACAGTATCCACAATACAGCC  
GCTAGAAAATAAGACCAACTGCCAGTAGCCTATCAATACTGGCTGCCAGCCGAACCTTAAGTGTCCGCCACCCCC-GGAA  
AATCAGTATGGACAGCCAGGAATGTTCCAGCCCCACAGGACAG----GGCGCCATACCCTCAGCCACCACCTATGAGAC  
-----TTAATCCTACAGCACCACCTAGT  
GAGCAGGGTAGTGTATTACATAAAATATTGATGAG-----GCAAGAAAACAAAGAGA--TATTGAGGCATGGCA  
ATTCACAGTAATATTAGAACAATACCACCTGGAGAAGGG-----GCCAAGAGGGAGAGCCTCCCCTAGCTGA  
GGCCAGATATGAGTCTTTTCTATAAAAAAGTCT-AAAAGATATGAAAGAGGGAGTAA--AACAGTATGGACCCAACCTCCC  
CTTATATGAGGACATTATTAGATTCATTGCTCATGGACAT--AGACTCATTC- TTA--TGATTGGGAGA--TTCTGGC  
CAAATGTCTCT-CTCACCTC- TCAATTTTACAATTTAAGACTTGGTG-----GATTGATGGG-----GCAC  
AACAACA

>8\_047

A-TGGCCACCAACTCCTTCTCCCGCGGTTCCAGATGCCTGTGATGTCACAATCTCAA-----  
-----TGCCAATCCAGGCACAGTATCCGCAATACCAGCC  
AGTAGAAAATAAAACCCAACCATCGGTAGTTTATCAACACCAGCCGCCAGCCGATTTTCAGTATCCGCCGTCTCC-AGAG  
GTTTCAGTATGGATCTCAGGCGGTGCTCCTGTGCCAAATAGCAA---GGCAGTATATCAACAACCCACGGCGATGGCGT  
-----TTGATCTTACGGTACCACCTAGT  
GGACAAGATAGTGCATGAGACCATTGCTACA-----GCCAGAAAACAGGGAGA--TCTTGAGGCATGGCA  
ATATCCGGTAATGTTACAACAGATGCCGGCCGGGAAAGGC-----AGTCAAGCA-----  
-----GGAGTTA--AACAATATGGACCTAACTCTC  
CTTATATGAGAACATTATTAAATTCATTGCTCATGGAAAT--AGACTTATTTC- TTA--TGATTGGGAAA--TTCTGGC  
TAAATCTTCCCT-TTCACCCTC-TCAGTATCTCCAGTTTAAACCTGGTG-----GATTGATGGG-----GTAC  
AAGAACA

>8\_074

A-TGGCCACCAACTCCTTCTCCCGCGGTTCCAGATGCCTGTGATGTCACAATCTCAA-----  
-----TGCCAATCCAGGCACAGTATCCGCAATACCAGCC  
AGTAGAAAATAAAACCCAACCATCGGTAGTTTATCAACACCAGCCGCCAGCCGATTTTCAGTATCCGCCGTCTCC-AGAG  
GTTTCAGTATGGATCTCAGGCGGTGCTCCTGTGCCAAATAGCAA---GGCAGTATATCAA---CCACGGCGATGGCGT  
-----TTGATCTTACGGTACCACCTAGT  
GGACAAGATAGTGCATGAGACCATTGCTACA-----GCCAGAAAACAGGGAGA--TCTTGAGGCATGGCA  
ATATCCGGTAATGTTACAACAGATGCCGGCCGGGAAAGGC-----AGTCAAGCA-----  
-----GGAGTTA--AACAATATGGACCTAACTCTC  
CTTATACGAGAATATTATTAAATTCATTGCTCATGGAAAT--AGACTTATTTC- TTA--TGATTGGGAAA--TTCTGGC  
TATATCTTCCCT-TTCACCCTC-TCAGTATCTCCAGTTTAAACCTGGTG-----GATTGATGGG-----GTAC  
AAGAACA

>8\_094

A-TGGCCACCAACTCCTTCTCCCGCGGTTCCAGATGCCTGTGATGTCACAATCTCAA-----  
-----TGCCAATCCAGGCACAGTATCCGCAATACCAGCC  
AGTAGAAAATAAAACCCAACCATCGGTAGTTTATCAACACCAGCCGCCAGCCGATTTTCAGTATCCGCCGTCTCC-AGAG  
GTTTCAGTATGGATCTCAGGCGGTGCTCCTGTGCCAAATAGCAA---GGCAGTATATCAA---CCACGGCGATGGCGT  
-----TTGATCTTACGGTACCACCTAGT  
GGACAAGATAGTGCATGAGACCATTGCTACA-----GCCAGAAAACAGGGAGA--TCTTGAGGCATGGCA  
ATATCCGGTAATGTTACAACAGATGCCGGCCGGGAAAGGC-----AGTCAAGCA-----



-----GGAGTTA--ACAATATGGACCTAACTCTC  
CTTATATGAGAATATTATTAATTCATTGCTCATGGAAAT--AGACTTATTC-TTA--TGATTGGGAAA-TTCTGGC  
TATATCTTCCCT-TTCACCCTC-TCAGTATCTCCAGTTTAAACCTGGTG-----GATTGATGGG-----GTAC  
AAGAACA

>8\_121

-----GTCAGTAAGGTCCCAATTTCG  
CTTCTGTCCAGTCACTATTACACTCAGTAACTCAGGACAAG--CGATTGGCCCC-GGA--CGATTGGGAGA-TTTTAGC  
AAAAGCTACTCT-TTCGCCCTC-CCAATTTCTCAATTTAAAGTTGGTG-----GACCGATGAG-----GCTC  
AAAATCA

>8\_235

-----GGCCTTT-GGGGC---TAAACCACGATG  
GCCACC--TCCTCCTCAGTGTAGTGAGTGCTGGGGGAGG-----AACCTGAAACTAGGCTCGCTGTGACTTGG  
TTCACAGCACCCATTATTGCCCAACCTGCAGTT----CACTATGGTGAAGGAGCAA--TTCAGACTCACCTGCAGTGT  
CTTGATGGGTCAAACAGTGA--CCACTCCCTAAGGAAAAGTTGGGGGCGCTGCATAAAATAGTTTAAAAA-CTATTTT  
AAAAGGACATGTTTCACTCACT-----

>8\_525

A-GGCAC---AAGTCCTCTTCCAGCAGGTCAGGTGCCCGTAACATTACAACCTCAAAGCAGGTAA-----  
---AGAAAATAAGACCCAACCACCAGTAGCCTATCAATACTGGCCGCCGGCTGAACTTCAGTATCGGCCACCCCC-AGAA  
AGTCAGTATGGATATCCAGGAATGCCCCAGCACCACAGGGCAG----GGCGCCATACCCTCAGCCGCCACTAGGAGAC  
-----TTAATCCTACGGCACCACCTAGT  
AGACAGGGTAGTGAATTACATGAAATTTATTGATAA-----TCAAGAAAGGAAGGAGA--TACTGAGGCATGGCA  
ATTCCAGTAACGTTAGAACCGATGCCACCTGGAGAAGGA-----GCCAAGAGGGAGAGCCTCTCACAGTTGA  
GGCCAGATACAAGTCTTTTTCGATAAAAAATGCT-AAAAGATATGAAAGAGGGAGTAA--AACAGTATGGACCCAACCTCC  
CTTATATGAGGACATTATTAGATTCATTGCTCATGGACAT--AGACTCATTC-TTA--CAATTGGGAGA-TTCTGGA  
AAAATCGTCTCT-CTCACCCTC-TCAATTTTACAATTTAAGACTTGGTG-----GATTGATGGG-----GTAC  
AAGAACA

>8\_559

A-TGGCCACCAACTCCTTCTCCTGTGGTTTCCAGATGCCTGTGACATTACAACCTCAA-----  
-----TGCCAATACAGACACAGTATCTACAATATCAGCT  
GGTTGAAAATAAAACCCAACCCTGGTAGTTTATCAACACTGGCCGCCAGCCGAATTTTCAGTATCGGCCATCTCC-AGAG  
GTGCAGTATAGATCCAGATGGGA--TCCTGTGCCAAATAGTAG----GGCACTATATCAACAACCCACGGCGATGGTGT  
-----TTGATCCTACAGTACCAGCTAGT  
GGACAAGATAGTGCATGACATGAGACCGTTGATACA-----GCCAGAAAACAGGGGAGA--TCTTGAGGCATGGCA  
GTATCCGGTAATGTTACAACCGATACCGCCGGGAAAGGGCCAGGAAAGGGAGTCAAGCAGGAGCGTCTGTCCGACCGGA  
GGCTAGGTAAGAATATTTACCATGAAAATGTT-AAAAGACATAAAGGAAGGAGCTA--ACAATATGGACCCAACCTCTC  
CTTATATGAGAACGTTATTAGATTCATTGCTCATGGAAAT--AGACTTATTC-TTA--TGATTGGGAAA-TTTTACC  
TAAATCTTCCCT-TTCACCCTC-TCAGTATCTACAGTTTAAACCTGGTG-----GATTGATGGA-----GTAC  
AAGAACA

>9\_307

-----GGCATT-GGGGC---TACAACCACAATG  
GCCACC--TCCTCCTCAGCCGAGTGTGCTGGGGGAGG-----AGCTGAAACTAGGCACACTGCGACTTGG  
CTCGTGGCACTCATTTATTGCCCAACCTACAGTT----CACTACAGTGAAGGAGCAA--TTCAGACTCGCCCTGCAGTGT  
CCTGTATGGGTCAAACAGTGG--CCACTCTCTAAGGAAAAGTTGGGGGCGCTACATAAAATAGTTAAAAA-CTATTTA  
AAAAGGACATGTTTCAACCACT-----

>9\_340

A-TGGCCATCAACTCCTCCTCCCGCGGTTTCCAGATGCCTGTAACATTACAACCTCAAATGCAGGTTAGACAAGTACAAACC  
CCAAGAGAATATCAAAATAGAAAAGGAAAGAGTCTCTATCCCAGCAATGCCAATCCAGATGCAGTATCCACAATATCAGCT  
GGTAGAAAATAAGACCAACTGCCGTTAGCCTATCAATACTGGCCGCCAGCCAACTTCAGTATCGGCCGCCCCC-AGAG  
TATCAGTATGGATGGCCAGGA-TGTTTCCAGCACCAGGGCAG----GGCGCTATAGCCGAGCCGCCACTATGAGAC  
-----GTAATCCTACAGCACCACCTAGT  
GGACAGGGTCTGTGCTTACATAAAATTTATTGAAAAG-----ACA--AAACAAGGGGA--TACTGACGCGTGGCA  
GACCCCGGTAATATTAGAACCATAACCACCTGGAAGAGGG-----GCCAAGAGGGAGCGCCTCCCCGAGCTGA  
TGCCAGAAATGGGTCTTTTCTATGAAAATGCT-AAAAGACATGAAAGAGGGAGTAA--AACAGTATGGACCCAACCTCC  
CTTATAAAGAACATTTATTAGATTCAGTCTCATGGACAT--AGACTCATTC-TTA--TGATTGGGAGA-TTTTGGC  
CAAATCATCACT-CTCACC----TCAATTTTACAATTTAAGACCTGGTG-----GATTGATGGG-----ACAC  
AAGAACA



AGTCAGTATGGATATCCAGGAATGCCCCAGCACCACAGGGCAG----GGCGCCATACCCCTCAGCCGCCACTAGGAGAC  
-----TTAATCCTACGGCACCACCTAGT  
AGACAGGGTAGTGAATTACATGAAATTATTGATAAA-----TCAAGAAAGGAAGGAGA--TACTGAGGCATGGCA  
ATTCACAGTAATGTTAGAACCGATGCCACCTGGAGAAGGA-----GCCAAGAGGGAGAGCCTCCCACAGTTGA  
GGCCAGATACAAGTCTTTTCAATAAAAATGCT-AAAAGATATGAAAGAAGGAGTAA--AACAGTATGGACCCAACCTCCC  
CTTATATGAGGACATTATTAGATTCCATTGCTCATGGACAT--AGACTCATTC--TTA--TGATTGGGAGA--TTCTGGC  
AAAATCGTCTCT-CTTACCCTC-TCAATTTTACAATTTAAGACTTGGTG-----GATTGATGGG-----GTAC  
AAGAACA

>12\_419

-----GGCTGTT-GGGGT----TAAAAGCACGATG  
GCCACC--TCCTCCTCAGCCGAGTGAAGTGTGGGGGAGGG-----AGCCTGAAACTAGCTTGTGCGCACTTGG  
CTCGTGGCACTCATTATTGCCAACCTGCAGTT-----CACTACGGTGAAGGAGCAA--TTCAGACTTGCCTGCAGCTT  
CCTGTATGGGTCAAAGAGTGG--CCGCTCTCTAAGGAAAAGTTGGGGGTGTACATAAAAATAGTTAAAAA--CTATTTT  
AAATAGGATGTGTTCCACCCACT-----

>14\_023

A-TGGCCAACAACCTCCTTCTCCCACGGTTCAGATGCCTGTGACATTACAACCTCAAA-----TGCCAATCCAGACACAGTATCCACAATATCAGCC  
GGTAGAAAATAAAACCCAACCATCAGTAGTTTATGAACACCAGCCATCAGCCGAATTTTCAAGTATCGGCCGTCTCC-AGTG  
GTTTCAGTATAGATCCCAGGTGTTGTCTCTGTCGCAAAATAGCAG----GGCAGTATAGCAACAACCCATGGCGATGGTGT  
-----TTGATCCTACACTACCACCTAGT  
GGACAAGATAGTGCCTGCAAAAAATCATTGATAAA-----GCCAGAAAACAGGGAGA--TCTTGAGGCAGGGCA  
GTTCTTGGTAATTTTACAACCAATACCGGCTGGAAAACGG-----AGTCAAGCAGGAGCGTCTGTCCAAACTGA  
GGCTAGATATGAATCTTTCACCATGAAAATGTT-AAAAGATATGAAGGAGGCAGTTA--ACAATATGGACCCAACCTCTC  
CTTATATGAGAACATTATTAGATTCCATTGCTAATGGGAAT--AGACTTATTC--TTA--TGATTGGGAAA-TTTTGGC  
TAAATCTTCTCT-TTACCCTC-TCAGTATCTACAATTTAAAACCTGGTG-----GATTGACGGA-----GTAC  
AAGAACA

>16\_010

A-TGGC---CAACTCCTCCTCCCGTGGTTCAGATACCTGTAACATTACAACCTCAAATGCAGGTTAGACAAGTACAAACC  
CCAAGAGAATATCAAATAGAAAAGGATAG--TCTCTATCTCGGCAATGCCAATCCAGATACAGTATCCACAATATCAGCC  
AGTAGAAAATAAAACCCAACCGCATTAGCTTATCAATACTGGCTGCCAGCCGAGCTTCAGTATTTGGCTGCCCTCC-AGAG  
GTCCAATACAGACCTCAAGTGGTGTGTGCCATGCCAAATTGCAC----GGCATCGTACAAGCAACCCATGGCGGTGGTGT  
TTAATACGTCAGCACCACAGGGCGCGGCGTGTGTCTCAGCCGCCACTATGAGACTTAATCCAACAGCACCACCTAGT  
GGACAAGGTAGCACACTGCACGCGATCATTGATGAA-----GCTAGAAAACAGGGAGA--TCTTGAGGCGTGGCA  
GTTCTTGGTAATTTTACAATCGGTACCGGCCGGGGAAGGG-----GCTCCAGCAGGAGCACCTGCGGTGGCTAA  
TGCTAGATATGAACGCTTCACCATGAAAATGTT-AAAAGACATGAAGGAAGGAGTTA--ACAATATGGACCCAACCTCAC  
CTTCTATGAGAACATTATTAGATTCCATTGCTCCAGCAGG-----

>17\_029

-----GTCAGTATGGTCCCAATTCGC  
CTTTCATCCGATCGCTATTGCAATCTGTGGCTCAGAAATAAG--CTATTGACTCC-GTG--TGATTGGGAGA-TTTTAA  
GAAAGTTACT-TTCGCCCTC-CCAATTTCTTCAGTTTAAAGACTTGGTG-----GACCGACGAG-----GCTC  
AAAATCA

>19\_157

A-TGGCC---AACTCCTCTTCCAGCAGTTCAGATGCCTGTAACATTACAACCTCAAATGCAGGTTAGACAAGTACAAACC  
TGAAGAGAATAACAAAATAGAGAAAGATAGAGTATCTGTACAGCAATGCCAATCCAAATACAGTATCCACAATATCAGCT  
GGTAGAAAATAAGACCCAACCTGCCAGTAGCCTATCAATACTGGCCGCCAGCCGAACCTTCAGTATTTGGCCGCCCT-AGAA  
AATCAGCATGGACAGCCAGGAATGTTTCCAGCACCACAGGGCAG----GGCACTATATCCGCAGCCTCCCACATGAGAC  
-----TTAATCCTACATCACCACCTAGT  
AGACAGGGTGGTGCATTACATAAAATATT--AAA-----GCAAGAAAACAAGGAGA--TATCGAGGCGTGGCA  
GTTCCAGTAATATTAGAGCCGATACCACCTGAAGAAGGG-----GCCAAGAGGGAGAGCCTCCCCTAGCTGA  
GGCCAGATATGAGTCTTTTCTATAAAAATGCT-AAAAGATGTGAAAGAGGGAGTAA--AA-AGTATGGACTCAACTCCC  
CTTATTTGAGGACATTATTAATTTCCATTGCTCATGGACAT--AGACTCATTC--TTT--TGATTGGGAGA-TTTTGGC  
CAAATCATCACT-CTCACCTC-T-ATCTTTTACAATTTAAGACTTGTG-----GATTGATGGG-----GTAC  
AAGAACA

>19\_238

A-GGGC---ATGTCTCTTCCAGCAGGTCAGATGCCCGTAATATFACAACCTCAAACGCAGTTTAG-----  
-----  
---AGAAAATAAGACCCAACCGCCAGTAGCTTATCAATAATGGCCGCCAGCCAACTTCAGTATCGGCCACCCCC-AGAA  
AGTCAGTATGGATATCCAGGAACGCTCCCAGCACCACAGGGCAG----GGCGCCATACCCCTCAGCCACCCACTAGGAGAC  
-----TTAATCCTATGGTACCACCTAGT  
AGACAGGGTAGTGAATTACCAGAAATATTGATAAG-----TCAAGAAAGGAAGGAGA--TATTGAGGCATGGCA  
ATTCCAAATAATGTTAGA-----ACCACCTGGAGAAGGA-----GCCAAGAGGGAGAGCCTCTCAGATTGA





AGTCAGTATGGATATCCAGGAATGCCCCAGCACCACAGGGCAG----GGCGCCATACCCTCAGCCGCCACTAGGAGAC  
-----TTAATCCTACAGCACCACCTAAT  
AGACAGGGTAGTGCATTACATAAAAATTATTGATAAG-----TCAAGAAAGCAAGGAGA--TATTGAGGCGTGGCC  
ATTCCTACTAATGTTAGAACTGATACCACCTGGAGAAGGA-----GCCAAGAGGGAGAGCCTCCCACAGTTGA  
GGCCAGATACAAGTCTTTTTCTATAAAAATGCT-AAAAGACATGAAAGAGGGGATAA--AACAGTATGGACCCAACTCCC  
CTTATATGAGGACATTATTAGATTCCATTGCACACGGACAT--AGACTCATTC--TTA--TGATTGGGAGA--TTCTGGC  
AAAATCGTCTCT-CTCACCTC-TCAATTTTTACAATTTAAGACTTGGTG-----GATTGATAGA----GTAC  
AAGAACA

>108

A-AGGCC---AAGTCTCTTCCAGCAAGTCAGGTGCTGTAAACATTACAACCTCAAACGCAGGTAA-----  
-----  
---AGAAAATAAGACCCAACCTGCCAGTAGCCTATCAATACTGGCTGCCAGCCGAACCTAAGTGTGCGCCACCCCC--GGAA  
AATCAGTATGGACAGCCAGGAATGTTCCAGCCCCACAGGACAG----GGCGCCATACCCTCAGCCACCCTATGAGAC  
-----TTAATCCTACAGCACCACCTAGT  
GAGCAGGGTAGTGTATTACATAAAAATTATTGATGAG-----GCAAGAAAACAAAGAGA--TATTGAGGCATGGCA  
ATTCCTAGTAATATTAGAACCAATACCACCTGGAGAAGGG-----GCCAAGAGGGAGAGCCTCCCCTAGCTGA  
GGCCAGATATGAGTCTTTTTCTATAAAAATGCT-AAAAGATATGAAAGAGGGAGTAA--AACAGTATGGACCCAACTCCC  
CTTATATGAGGACATTATTAGATTCCATTGCTCATGGACAT--AGACTCATTC--TTA--TGATTGGGAGG--TTCTGGC  
CAAATGTCTCT-CTCACCTC-TCAATTTTTACAATTTAAGACTTGGTG-----GATTGATGGG-----GCAC  
AACAACA

>94

A-GGGCC---AAGTCTCTTCCAGCAGGTGAGTGCCTGTAAACATTACAACCTCAAACGCAGGTAG-----  
-----  
---AGAAAATAAGAGCCAACCACCTAGTCTTATCAATACTGGCCGCTGGCTGAACTTCAAGTATCAGCCACCCCC--AGAA  
AGTCAGTATGGATATCCAGGAATGCCCCAGCACCACAGGGCAG----GGCGCCATACCCTCAGCCGCCACTTAGGAGAC  
-----TTAATCCTACGGCACCCTAGT  
AGACAGGGTAGTGAATTACATAAAAATTATTGATGAG-----GCAAGAAAACAAAGAGA--TATTGAGGCATGGCA  
ATTCCTAGTAATATTAGAACCAATACCACCTGGAGAAGGG-----GCCAAGAGGGAGAGCCTCCCCTAGCTGA  
GGCCAGATATGAGTCTTTTTCTATAAAAATGCT-AAAAGATATGAAAGAGGGAGTAA--AACAGTATGGACCCAACTCCC  
CTTATATGAGTACATTATTAGATTCCATTGCTCATGGACAT--AGACTCATTC--TTA--TGATTGGGAGA--TTCTGGC  
AAGATCATCTCT-CTCACCTC-TCAATTTTTACAATTTAAGACTTGGTG-----GATTGATGGG-----GTAC  
AAGAACA

>93

A-GGGCC---AAGTCTCTTCCAGCAGGTGAGTGCCTGTAAACATTACAACCTCAAATGCAGGTAGGCAAGTACAAACC  
CCAAGAGAATATCAAATAGAGAAAGATAGAGTCTCTGTACGGCAATGCCAATCAAATACAGTATCCACAATATCAGCC  
AGTAGAAAATAAGACCCAACCTGCCAGTACCTATCAATACTGGCTGCCAGCCGAACCTAAGTGTGCGCCACCCCC--GGAA  
AATCAGTATGGACAGCCAGGAATGTTCCAGCCCCACAGGACAG----GGCGCCATACCCTCAGCCACCCTATGAGAC  
-----TTAATCCTACAGCACCACCTAGT  
GAGCAGGGTAGTGTATTACATAAAAATTATTGATGAG-----GCAAGAAAACAAAGAGA--TATTGAGGCATGGCA  
ATTCCTAGTAATATTAGAACCAATACCACCTGGAGAAGGG-----GCCAAGAGGGAGAGCCTCCCCTAGCTGA  
GGCCAGATATGAGTCTTTTTCTATAAAAATGCT-AAAAGATATGAAAGAAGGAGTAA--AACAGTATGGACCCAACTCCC  
CTTATATGAGGACATTATTAGATTCCATTGCTCATGGACAT--AGACTCATTC--TTA--TGATTAGGAGA--TTCTGGC  
AAAATCGTCTCT-CTCACCTC-TCAATTTTTACAATTTAAGACTTAGTA-----GATTGATGAG-----GTAC  
AAGAACG

>B12

A-GGCAC---AAGTCTCTTCCAGCAGGTGAGTGCCTGTAAAGATTACAACCTCAAAGCAGGTAA-----  
-----  
---AGAAAATAAGACCCAACCAGTAGCCTATCAATACTGGCCGCTGGCTGAACTTCAAGTATCAGCCACCCCC--AGAA  
AGTCAGTATGGATATCCAGGAACGCTCCAGCACCACAGGGCAG----GGCGCCATACCCTCAGCCACCCTATGAGAC  
-----TTAATCCTATGGCACCACCTAGT  
AGACAGGGTAGTGAATTACATGAAATTATTGATAAA-----TCAAGAAAGGAAGGAGA--TACTGAGGCATGGCA  
ATTCCTAGTAACGTTAGAACCAGTACCACCTGGAGAAGGA-----GCCAAGAGGGAGAGCCTCCCCTAGCTGA  
GGCCAGATACAAGTCTTTTTCTATAAAAATGCT-AAAAGATATGAAAGAGGGAGTAA--AACAGTATGGACCCAACTCCC  
CTTATATGAGGACATTATTAGATTCCATTGCTCATGGACAT--AGACTCATTC--TTA--TGATTGGGAGG--TTCTGGC  
CAAATGTCTCT-CTCACCTC-TCAATTTTTACAATTTAAGACTTAGTA-----GATTGATGAG-----GTAC  
AACAACA

>B362

A-GGCAC---AAGTCTCTTCCAGCAGGTGAGTGCCTGTAAAGATTACAACCTCAAAGCAGGTAA-----  
-----  
---AGAAAATAAGACCCAACCAGTAGCCTATCAATACTGGCCGCTGGCTGAACTTCAAGTATCAGCCACCCCC--AGAA  
AGTCAGTATGGATATCCAGGAATGCCCCAGCACCACAGGGCAG----GGCGCCATACCCTCAGCCACCCTATGAGAC  
-----TTAATCCTATGGCACCACCTAGT  
GAGCAGGGTAGTGTATTACATAAAAATTATTGATGAG-----GCAAGAAAACAAAGAGA--TATTGAGGCATGGCA  
ATTCCTAGTAATATTAGAACCAATACCACCTGGAGAAGGG-----GCCAAGAGGGAGAGCCTCCCCTAGCTGA  
GGCCAGATATGAGTCTTTTTCTATAAAAATGCT-AAAAGATATGAAAGAGGGAGTAA--AACACTATGGACCCAACTCCC  
CTTATATGAGGACATTATTAGATTCCATTGCTCATGGACATCATAGACTCATTC--TTA--TGATTGGGAGA--TTCTGGC  
AAAATCGTCTCT-CTCACCTC-TCAATTTTTACAATTTAAGACTTGGTG-----GATTGATGGG-----GCAC  
AAGAACA

>B276

A-GGCAC---AAGTCTCTTCCAGCAGGTGAGTGCCTGTAAAGATTACAACCTCAAAGCAGGTAA-----  
-----  
---AGAAAATAAGACCCAACCAGTAGCCTATCAATACTGGCCGCTGGCTGAACTTCAAGTATCAGCCACCCCC--AGAA  
AGTCAGTATGGATATCCAGGAATGCCCCAGCACCACAGGGCAG----GGCGCCATACCCTCAGCTGCCACTTAGGAGAC  
-----TTAATCCTATGGCACCACCTAGT  
AGACAGGGTAGTGAATTACATGAAATTATTGATAAA-----TCAAGAAAGGAAGGAGA--TACTGAGGCGTGGCA  
ATTCCTAGTAACATTAGAACCAGTACCACCTGGAGAAGGA-----GCCAAGAGGGAGAGCCTCCCCTAGCTGA

GGCCAGATATGAGTCTTTTTCTATAAAAAATGCT-AAAAGATATGAAAGAGGGAGTAA--AACAGTATGGACCCAACTCCC  
CTTATATGAGGACATTTATTAGATTCCATTGCTCATGGACAT---AGACTCATTC- TTA--TGATTGGGAGG-TTCTGGC  
CAAATTGTCTCT-CTCACCTC-TCAATTTTACAATTTAAGACTTGGTG-----GATTGATGGG-----GCAC  
ACAACA

>B282

A-GGCAC---AAGTCATCTTCCAGCAGGTGAGGTGCCCGTAACATTACAACCTCAAAGCAGGTAA-----  
-----  
---AGAAAATAAGACCCAACCGCCAGTAGCCTATCAATACTGGCCACCGGCTGAACCTCAGTATCGGCCACCCCC-AGAA  
AATCAGTATGGACAGCCAGGAATGTTCCAGCCCCACAGGACAG---GGCGCCATACCCTCAGCCACCCACTATGAGAC  
-----TTAATCCTACAGCACCACCTAGT  
GAGCAGGGTAGTGTATTACATAAAAATTATTGATGAG-----GCAAGAAAACAAAGAGA--TATTGAGGCATGGCA  
ATTCCCAGTAATATTAGAACCAATACCACCTGGAGAAGGG-----GCCAAGAGGGAGAGCCTCCCCTAGCTGA  
GGCCAGATATGAGTCTTTTTCTATAAAAAATGCT-AAAAGATATGAAAGAGGGAGTAA--AACAGTATGGACCCAACTCCC  
CTTATATGAGGACATTTATTAGATTCCATTGCTCATGGACAT---AGACTCATTC- TTA--TGATTGGGAGA-TTCTGGC  
AAAATCGTCTCT-CTCACCTC-TCAATTTTACAATTTAAGACTTGGTG-----GATTGATAGA-----GTAC  
AGAACA

>B188

A-GGCAC---AAGTCCTCTTCCAGCAGGTGAGGTGCCCGTAAGATTACAACCTCAAACGCAGGTAA-----  
-----  
---AGAAAATAAGACCCAACCGCCAGTAGCTTATCAATACTGGCCGCGGCTGAACCTCAGTATCGGCCACCCCC-AGAA  
AGTCAGTATGGATATCCAGGAATGTTCCAGCCCCACAGGACAG---GGCGCCATACCCTCAGCCACCCACTATGAGAC  
-----TTAATCCTACAGCACCACCTAGT  
GAGCAGGGTAGTGAATTACATGAAATTTATTGATAAA-----TCAAGAAAGGAAGGAGA--TACTGAGGCATGGCA  
ATTCCCAGTAACGTTAGAACCGATGCCACCTGGAGAAGGA-----GCCAAGAGGGAGAGCCTCCCACAGTTGA  
GGCCAGATACAAGTCTTTTTCTATAAAAAATGCT-AAAAGATATGAAAGAGGGAGTAA--AACAGTATGGACCCAACTCCC  
CTTATATGAGGACATTTATTAGATTCCATTGCTCATGGACAT---AGACTCATTC- TTA--TGATTGGGAGG-TTCTGGC  
CAAATTGTCTCT-CTCACCTC-TCAATTTTACAATTTAAGACTTGGTG-----GATTGATAGA-----GCAC  
ACAACA

>B262

A-GAGCC---AAGTCCTTTTCTAGCAGGTGAGATGCCATAACATTACAACCTCAAACGCAGGTAG-----  
-----  
---AGAAAATAAGACCCAACCGCCAGTAGCTTATCAATACTGGCCACTGGCTGAACCTCAGTATCGGCCACCCCC-AGAA  
AGTCAGTATGGATATCCAGGAATGCCCCAGCACCACAGGGCAG---GGCGCCATACCCTCAGCCGCCACTAGGAGAC  
-----TTAATCCTATGGCACCACCTAGT  
AGACAGGGTAGTGAATTACATGAAATTTATTGATAAA-----TCAAGAAAGGAAGGAGA--TACTGAGGCATGGCA  
ATTCCCAGTAACGTTAGAACCGATGCCACCTGGAGAAGGA-----GCCAAGAGGGAGAGCCTCCCACAGTTGA  
GGCCAGATACAAGTCTTTTTCTATAAAAAATGCT-AAAAGATATGAAAGAGGGAGTAA--AACAGTATGGACCCAACTCCC  
CTTATATGAGGACATTTATTAGATTCCATTGCTCATGGACAT---AGACTCATTC- TTA--TGATTGGGAGG-TTCTGGC  
AAAATCGTCTCT-CTCGCCCTC-TCAATTTTACAATTTAAGACTTGGTG-----GATTGATAGA-----GTAC  
AGAACA

>B358

A-GGCAC---AAGCCCTCTTCCAGCAGGTGAGGTGCTCGTAAGATTACAACCTCAAAGCAGGTAA-----  
-----  
---AGAAAATAAGACCCAACCGCCAGTAGCCTTATCAATACTGGCTGCCAGCCGAACTTAAGTGTGGCCACCCCC-GGAA  
AATCAGTATGGACAGCCAGGAATGTTCCAGCCCCACAGGACAG---GGCGCCATACCCTCAGCCACCCACTATGAGAC  
-----TTAATCCTACAGCACCACCTAGT  
GAGCAGGGTAGTGTATTACATAAAAATTATTGATGAG-----GCAAGAAAACAAAGAGA--TATTGAGGCATGGCA  
ATTCCCAGTAATATTAGAACCAATACCACCTGGAGAAGGG-----GCCAAGAGGGAGAGCCTCCCCTAGCTGA  
GGCCAGATATGAGTCTTTTTCTATAAAAAATGCT-AAAAGATATGAAAGAGGGAGTAA--AACAGTATGGACCCAACTCCC  
CTTATATGAGGACATTTATTAGATTCCATTGCTCATGGACAT---AGACTCATTC- TTA--TGATTGGGAGG-TTCTGGC  
CAAATTGTCTCT-CTCACCTC-TCAATTTTACAATTTAAGACTTGGTG-----GATTGATAGA-----GTAC  
AGAACA

>B98a

A-GGACC---AAGTCCTCTTCCAGTAGGTGAGATGCCCGTAACATTACAACCTCAAACGCAGGTAG-----  
-----  
---AGGAAATAAGACCCAACCGCCAGTAGCCTTATCAATACTGGCTGCCAGCCGAACTTAAGTGTGGCCACCCCC-AGAA  
AGTTAGTATGGATATCCAGGAATGCCCCAGCACCACAGGGCAG---GGCGCCATACCCTCAGCCGCCACTAGGAGAC  
-----TTAATCCTACGGCACCACCTAGT  
AGACAGGGTAGTGAATTACATGAAATTTATTGATAAA-----TCAAGAAAGGAAGGAGA--TACTGAGGCATGGCA  
ATTCCCAGTAACGTTAGAACCGATGCCAAGTGGAGAAGGA-----GCCAAGAGGGAGAGCCTCCCCTAGCTGA  
GGCCAGATATGAGTCTTTTTCTATAAAAAATGCT-AAAAGATATGAAAGAGAGAGTAA--AACAGTATGGACCCAACTCCC  
CTTATATGAGGACATTTATTAGATTCCATTGCTCATGGACAT---AGACTCATTC- TTA--TGATTGGGAGG-TTCTGGC  
AAAATCGTCTCT-CTCACCTC-TCAATTTTACAATTTAAGACTTGGTG-----GATTGATGGG-----GTAC  
AGAACA

>B269

A-GGCAC---AAGTCCTCTTCCAGCAGGTGAGGTGCTGTAACATTACAACCTCAAACGCAGGTAA-----  
-----  
---AGAAAATAAGACCCAACCGCCAGTAGCCTTATCAATACTGGCTGCCAGCCGAACTTAAGTGTGGCCACCCCC-GGAA  
AATCAGTATGGACAGCCAGGAATGTTCCAGCCCCACAGGACAG---GGCGCCATACCCTCAGCCACCCACTATGAGAC  
-----TTAATCCTACAGCACCACCTAGT  
GAGCAGGGTAGTGTATTACATAAAAATTATTGATGAG-----GCAAGAAAACAAAGAGA--TATTGAGGCATGGCA  
ATTCCCAGTAATATTAGAACCAATACCACCTGGAGAAGGG-----GCCAAGAGGGAGAGCCTCCCCTAGCTGA  
GGCCAGATATGAGTCTTTTTCTATAAAAAATGCT-AAAAGATATGAAAGAGGGAGTAA--AACAGTATGGACCCAACTCCC  
CTTATATGAGGACATTTATTAGATTCCATTGCTCATGGACAT---AGACTCATTC- TTA--TGATTGGGAGG-TTCTGGC  
CAAATTGTCTCT-CTCACCTC-TCAATTTTACAATTTAAGACTTGGTG-----GATTGATGGG-----GCAC  
ACAACA

>B251

A-GGCAC---AAGTCTCTTCCAGCAGGTTCAGGTGCCTGTAACATTACAACCTCAAACGCAGGTTAGGCAAGTACAAACC  
CCAAGAGAATATCAAATAGAGAAAGATAGAGTCTCTGTACACGGCAATGCCAATCAAATACAGTATCCACAATATCAGCC  
GGTAGAAAATAAGACCCAACCTGCCAGTAGCTTATCAATACTGGCCGCCGGCCAACTTCAGTATCGGCCACCCCC-AGAA  
AGTCAGTATGGATATCCAGGAACGCTCCCAGCACCACAGGGCAG----GGTGCCATACCCTCAGCCACCCACTAGCAGAC  
-----TTAATCATACGGCACCACCTAGT  
AGACAGGGTGGTGAATTACATGAAATATTGATAAA-----TCAAGAAAGGAAGGAGA--TACTGAGGCATGGCA  
ATTCCCAGTAACGTTAGAACCAGATGCCACCTGGAGAAGGA-----GCCAAGAGGGAGAGCCTCCCACAGTTGA  
GGCCAGATACAAGTCTTTTTTCGATAAAAAATGCT-AAAAGATATGAAAGAGGGAGTAA--AACAGTATGGACCCAACCTCCC  
CTTATATGAGGACATTATTAGATTCCATTGCTCATGGACAT--AGACTCATTC-TTA--TGATTGGGAGA-TTCTGGC  
AAAATCGTCTCT-CACACCCTC-TCATTTTTTACAATTTAAGACTTGGTG-----GATTGATGGG-----GTAC  
AGAACA

>B100

A-GGGCC---AACTCTCTTCCAGCAGTTTCAGATGCCTGTAACATTACAACCTCAAATGCAGGTTAGGCAAGTACAAACC  
CCAAGAGAATATCAAATAGAGAAAGATAGAGTCTCTGTACACGGCAATGCCAATCAAATACAGTATCCACAATATCAGCC  
GGTAGAAAATAAGACCCAACCGCCAGAAGCTTATCAATACTGGCCGCCGGCTGAACCTTCAGTATCGGCCACCCCC-AGAA  
AGTCAGTATGGATATCCAGGAATGCCCCAGCACCACAGGGCAG----GGCGCCATACCCTCAGCTGCCCACTAGGAGAC  
-----TTAATCCTATGGCACCACCTAGT  
AGACAGGGTAGTGAATTACATGAAATATTGATAAA-----TCAAGAAAGGAAGGAGA--TACTGAGGCATGGCA  
ATTCCCAGTAACATTAGAACCAGATGCCAACCCTGGAGAAGGA-----GCCAAGAGGGAGAGCCTCTCACAGTTGA  
GGCCAGATACAAGTCTTTTTTCGATAAAAAATGCT-AAAAGATATGAAAGAGAGAGTAA--AACAGTATGGACCCAACCTCCC  
CTTATATGAGGACATTATTAGATTCCATTGCTCATGGACAT--AGACTCATTC-TTA--TGATTGGGAGA-TTCTGGC  
AAAATCGTCTCT-CTCACCCCTC-TCATTTTTTACAATTTAAGACTTGGTG-----GATTGATGGG-----GTTC  
AGAACA

>B81

A-GGGCC---AACTCTCTTCCAGCAGTTTCAGATGCCTGTAACATTACAACCTCAAATGCAGGTTAGGCAAGTACAAACC  
CCAAGAGAATATCAAATAGAGAAAGATAGAGTCTCTGTACACGGCAATGCCAATCAAATACAGTATCCACAATATCAGCC  
AGTAGAAAATAAGACCCAACCTGCCAGTAGCCTATCAATACTGGCCGCCGGCTGAACCTTCAGTATCGGCCACCCCC-AGAA  
AGTCAGTATGGATATCCAGGAATGCCCCAGCACCACAGGGCAG----GGCGCCATACCCTCAGCTGCCCACTAGGAGAC  
-----TTAATCCTATGGCACCACCTAGT  
AGACAGGGTAGTGAATTACATGAAATATTGATAAA-----TCAAGAAAGGAAGGGGA--TACTGAGGCATGGCA  
ATTCCCAGTAACGTTAGAACCAGATACCACCTGGAGAAGGA-----GCCAAGAGGGAGAGCCTCTCACAGTTGA  
GGCCAGATACAAGTCTTTTTTCGATAAAAAATGCT-AAAAGATATGAAAGAGGGAGTAA--AACAGTATGGACCCAACCTCTC  
CTTATATGAGGACATTATTAGATTCCATTGCTCATGGACAT--AGACTCATTC-TTA--TGATTGGGAGA-TTCTGGC  
AAAATCGTCTCT-CTCACCCCTC-TCATTTTTTACAATTTAAGACTTGGTG-----GATTGATGGG-----GTAC  
AGAACA

>B260

A-GGGCC---AACTCTCTTCCAGCAGTTTCAGATGCCTGTAACATTACAACCTCAAATGCAGGTTAGGCAAGTACAAACC  
CCAAGAGAATATCAAATAGAGAAAGATAGAGTCTCTGTACACGGCAATGCCAATCAAATACAGTATCCACAATATCAGCC  
GGTAGAAAATAAGACCCAACCGCAAGTAGCCTATCAATACTGGCCGCCGGCTGAACCTTCAGTATCGGCCACCCCC-AGAA  
AGTCAGTATGGATATCCAGGAATGCCCCAGCACCACAGGGCAG----GGCGCCATACCCTCAGCCGCCCACTAGGAGAC  
-----TTAATCCTATGGCACCACCTAGT  
AGACAGGGTAGTGAATTACATGAAATATTGATAAA-----TCAAGAAAGGAAGGAGA--TACTGAGGCATGGCA  
ATTCCCAGTAACGTTAGAACCAGATGCCACCTGGAGAAGGA-----GCCAAGAGGGAGAGCCTCCCACAGTTGA  
GGCCAGATACAAGTCTTTTTTCGATAAAAAATGCT-AAAAGATATGAAAGAGGGAGTAA--AACAGTATGGACCCAACCTCCC  
CTTATATGAGGACATTATTAGATTCCATTGCTCATGGACAT--AGACTCATTC-TTA--TGATTGGGAGA-TTCTGGC  
AAAATCGTCTCT-CTCACCCCTC-TCATTTTTTACAATTTAAGACTTGGTG-----GATTGATAGA-----GTAC  
AGAACA

>B83

A-GGGCC---AACTCTCTTCCAGCAGTTTCAGATGCCTGTAACATTACAACCTCAAATGCAGGTTAGGCAAGTACAAACC  
CCAAGAGAATATCAAATAGAGAAAGATAGAGTCTCTGTACACGGCAATGCCAATCAAATACAGTATCCACAATATCAGCC  
AGTAGAAAATAAGACCCAACCGCCAGTAGCCTATCAATACTGGCCGCCGGCCAACTTCAGTATCGGCCACCCCC-AGAA  
AGTCAGTATGGATATCCAGGAACGCTCCCAGCACCACAGGGCAG----GGTGCCATACCCTCAGCCACCCACTAGCAGAC  
-----TTAATCATACGGCACCACCTAGT  
AGACAGGGTGGTGAATTACATGAAATATTGATAAG-----TCAAGAAAGGAAGGAGA--TACTGAGGCATGGCA  
ATTCCCAGTAACGTTAGAACCAGATGCCACCTGGAGAAGGA-----GCCAAGAGGGAGAGCCTCCCACAGTTGA  
GGCCAGATACAAGTCTTTTTTCGATAAAAAATGCT-AAAAGATATGAAAGAGGGAGTAA--AACAGTATGGACCCAACCTCCC  
CTTATATGAGGACATTATTAGATTCCATTGCTCATGGACAT--AGACTCATTC-TTA--TGATTGGGAGA-TTCTGGC  
AAAATCGTCTCT-CTCACCCCTC-TCATTTTTTACAATTTAAGACTTGGTG-----GATTGATAGA-----GTAC  
AGAACA

>B281

A-GGGCC---AACTCTCTTCCAGCAGTTTCAGATGCCTGTAACATTACAACCTCAAATGCAGGTTAGGCAAGTACAAACC  
CCAAGAGAATATCAAATAGAGAAAGATAGAGTCTCTGTACACGGCAATGCCAATCAAATACAGTATCCACAATATCAGCC  
GGTAGAAAATAAGACCCAACCTGCCAGTAGCCTATCAATACTGGCTGCCAGCCGAACCTAAGTGTCCGCCACCCCC-GGAA  
AGTCAGTATGGATATCCAGGAATGCCCCAGCACCACAGGGCAG----GGCGCCATACCCTCAGCTGCCCACTAGGAGAC  
-----TTAATCCTATGGCACCACCTAGT  
AGACAGGGTAGTGAATTACATGAAATATTGATAAA-----TCAAGAAAGGAAGGAGA--TACTGAGGCATGGCA  
ATTCCCAGTAACGTTAGAACCAGATGCCACCTGGAGAAGGA-----GCCAAGAGGGAGAGCCTCCCACAGTTGA  
GGCCAGATACAAGTCTTTTTTCGATAAAAAATGCT-AAAAGATATGAAAGAGGGAGTAA--AACAGCATGGACCCAACCTCCC  
CTCATATGAGGACATTATTAGATTCCATTGCTCATGGACAT--AGACTCATTC-TTA--TGATTGGGAGA-TTCTGGC  
AAAATCGTCTCT-CTCACCCCTC-TCATTTTTTACAATTTAAGACTTGGTG-----GATTGATGGG-----GTAC  
AGAACA

>B270

A-GGGCC---AACTCTCTTCCAGCAGTTTCAGATGCCTGTAACATTACAACCTCAAATGCAGGTTAGGCAAGTACAAACC  
CCAAGAGAATATCAAATAGAGAAAGATAGAGTCTCTGTACACGGCAATGCCAATCAAATACAGTATCCACAATATCAGCC  
GGTAGAAAATAAGACCCAACCTGCCAGTAGCCTATCAATACTGGCTGCCAGCCGAACCTAAGTGTCCGCCACCCCC-GGAA  
AGTCAGTATGGATATCCAGGAATGCCCCAGCACCACAGGGCAG----GGCGCCATACCCTCAGCTGCCCACTAGGAGAC



AATCAGTATGGACAGCCAGGAATGTTCCAGCACCACAGGGCAG----GGCGCCATACCCTCAGCTGCCACTAGGAGAC  
-----TTAATCCTATGGCACCACCTAGT  
AGACAGGGTAGTGAATTACATGAAATATTGATAAA-----TCAAGAAAGGAAGGAGA--TACTGAGGCGTGGCA  
ATTCACAGTAACATTAGAACCAGTACCACCTGGAGAAGGA-----GCCAAGAGGGAGAGCCTCCCACAGTTGA  
GGCCAGATACAAGTCTTTTTCTATAAAAATGCT-AAAAGACATGAAAGAGGGGAGTAA--AACAGTATGGACCCAACTCCC  
CTTATATGAGGACATTATTAGATTCCATTGCACACGGACAT--AGACTCATTC--TTA--TGATTGGGAGA--TTCTGGC  
AAAATCGTCTCT-CTCACCTC-TCAATTTTTACAATTTAAGATTGGTG-----GATTAATGGG-----GCAC  
AGAACA

>B268

A-GGGC---AATCCTCTTCCAGCAGTTCAGATGCCTGTAACATTACAACCTCAAATGCAGGTTAGGCAAGTACAAACC  
CCAAGAGAATATCAAATAGAGAAAGATAGAGTCTCTGTACGGCAATGCCAATCAAATACAGTATCCACAATATCAGCC  
GGTAGAAAATAAGACCCAACCGCCAGTAGCCTATCAATACTGGCCTCCGGCTGAACCTCAGTATCGGCCACCCCC-AGAA  
AGTCAGTATGGATATCCAGGAATGCCCCAGCACCACAGGGCAG----GGCGCCATACCCTCAGCCGCCACTAGGAGAC  
-----TTAATCCTACGGCACCACCTAGT  
AGACAGGGTAGTGAATTACATGAAATATTGATAAA-----TCAAGAAAGGAAGGAGA--TACTGAGGCATGGCA  
ATTCACAGTAACGTTAGAACCAGTACCACCTGGAGAAGGA-----GCCAAGAGGGAGAGCCTCCCACAGTTGA  
GGCCAGATACAAGTCTTTTTCGATAAAAATGCT-AAAAGATATGAAAGAGGGAGTAA--AACAGTATGGACCCAACTCCC  
CTTATATGAGGACATTATTAGATTCCATTGCTCATGGACAT--AGACTCATTC--TTA--TGATTGGGAGG--TTCTGGC  
CAAATGCTCTCT-CTCACCTC-TCAATTTTTACAATTTAAGACTTGGTG-----GATTGATGGG-----GCAC  
ACAACA

>B44

A-GGCAC---AAGTCTCTTCCAGCAGGTCAGGTGCCCGTAAGATTACAACCTCAAACGCAGGTTAA-----  
-----  
---AGAAAATAAGACCCAACCGCCAGTAGCTTATCAATACTGGCCGCCGGCTGAACCTCAGTATCGGCCACCCCC-AGAA  
AGTCAGTATGGATATCCAGGAATGCCCCAGCACCACAGGGCAG----GGCGCCATACCCTCAGCTGCCACTAGGAGAC  
-----TTAATCCTATGGCACCACCTAGT  
AGACAGGGTAGTGAATTACATGAAATATTGATAAA-----TCAAGAAAGGAAGGAGA--TACTGAGGCATGGCA  
ATTCACAGTAACGTTAGAACCAGTACCACCTGGAGAAGGA-----GCCAAGAGGGAGAGCCTCCCACAGTTGA  
GGCCAGATACAAGTCTTTTTCGATAAAAATGCT-AAAAGATATGAAAGAGGGAGTAA--AACAGTATGGACCCAACTCTC  
CTTATATGAGGACATTATTAGATTCCATTGCTCATGGACAT--AGACTCATTC--TTA--TGATTGGGAGA--TTCTGGC  
AAAATCGTCTCT-CTCACCTC-TCAATTTTTACAATTTAAGACTTGGTG-----GATTGATGGG-----GTAC  
AGAACA

>B148

A-GGCAC---AAGTCATCTTCCAGCAGGTCAGGTGCCCGTAACATTACAACCTCAAAGCAGGTTAA-----  
-----  
---AGAAAATAAGACCCAACCGCCAGTAGCCTATCAATACTGGCCGCCGGCTGAACCTCAGTATCGGCCACCCCC-AGAA  
AGTCAGTATGGATATCCAGGAATGCCCCAGCACCACAGGGCAG----GGCGCCATACCCTCAGCCACCCACTAGGAGAC  
-----TTAATCCTACGGCACCACCTAGT  
AGACAGGGTAGTGAATTACATGAAATATTGATAAA-----TCAAGAAAGGAAGGAGA--TACTGAGGCATGGCA  
ATTCACAGTAACGTTAGAACCAGTACCACCTGGAGAAGGA-----GCCAAGAGGGAGAGCCTCCCACAGTTGA  
GGCCAGATACAAGTCTTTTTCGATAAAAATGCT-AAAAGATATGAAAGAGGGAGTAA--AACAGTATGGACCCAACTCCC  
CTTATATGAGGACATTATTAGATTCCATTGCTCATGGACAT--AGACTCATTC--TTA--TGATTGGGAGA--TTCTGGC  
AAAATCGTCTCT-CTCACCTC-TCAATTTTTACAATTTAAGACTTGGTG-----GATTGATGGG-----GTAC  
AGAACA

>B187

A-GGCAC---AAGTCTCTTCCAGCAGGTCAGGTGCCCGTAAGATTACAACCTCAAAGCAGGTTAA-----  
-----  
---AGAAAATAAGACCCAACCGCCAGTAGCCTATCAATACTGGCCGCCGGCTGAACCTCAGTATCGGCCACCCCC-AGAA  
AGTCAGTATGGATATCCAGGAATGCCCCAGCACCACAGGGCAG----GGCGCCATACCCTCAGCCGCCACTAGGAGAC  
-----TTAATCCTATGGCACCACCTAGT  
AGACAGGGTAGTGAATTACATGAAATATTGATAAA-----TCAAGAAAGGAAGGAGA--TACTGAGGCATGGCA  
ATTCACAGTAACGTTAGAACCAGTACCACCTGGAGAAGGA-----GCCAAGAGGGAGAGCCTCCCACAGTTGA  
GGCCAGATACAAGTCTTTTTCGATAAAAATGCT-AAAAGATATGAAAGAGGGAGTAA--AACAGTATGGACCCAACTCCC  
CTTATATGAGGACATTATTAGATTCCATTGCTCATGGACAT--AGACTCATTC--TTA--TGATTGGGAGA--TTCTGGC  
AAAATCGTCTCT-CTCACCTC-TCAATTTTTACAATTTAAGACTTGGTG-----GATTGATGGG-----GTAC  
AGAACA

>B45

A-GGCAC---AAGTCTCTTCCAGCAGGTCAGGTGCCCGTAACATTACAACCTCAAACGCAGGTTAA-----  
-----  
---AGAAAATAAGACCCAACCGCCAGTAGCCTATCAATACTGGCCGCCGGCTGAACCTCAGTATCGGCCACCCCC-AGAA  
AGTTAGTATGGATATCCAGGAATGCCCCAGCACCACAGGGCAG----GGCGCCATACCCTCAGCCGCCACTAGGAGAC  
-----TTAATCCTACGGCACCACCTAGT  
AGACAGGGTAGTGAATTACATGAAATATTGATAAA-----TCAAGAAAGGAAGGAGA--TACTGAGGCATGGCA  
ATTCACAGTAACGTTAGAACCAGTACCACCTGGAGAAGGA-----GCCAAGAGGGAGAGCCTCTCACAGTTGA  
GGCCAGATACAAGTCTTTTTCGATAAAAATGCT-AAAAGATATGAAAGAGAGAGTAA--AACAGTATGGACCCAACTCCC  
CTTATATGAGGACATTATTAGATTCCATTGCTCATGGACAT--AGACTCATTC--TTA--TGATTGGGAGA--TTCTGGC  
AAAATCGTCTCT-CTCACCTC-TCAATTTTTACAATTTAAGACTTGGTG-----GATTGATGGG-----GTTC  
AGAACA

>B2

A-GAGCC---AAGTCTTTTTCTAGCAGGTCAGATGCCATAACATTACAACCTCAAACGCAGGTTAG-----  
-----  
---AGAAAATAAGACCCAACCCAGTAGCTTATCAATACTGGCCACTGGCTGAACCTCAGTATCAGCCACCCCC-AGAA  
AGTCAGTATGGACATCCAGGAATGCTGCCAGCACTACAGAATAG----GGTGCCACACCCTCAGCCGCCACTTTGAGAC  
-----TTAATCCTATGGCACCACCTAGT  
AGACAGGGTAGTGCATTACATAAAAATATTGTCAAGAAAATTATAGTCAAGAAAGCAAGGAGA--TACTGAGGTGGGCA  
ATTCACAGTAATGTTGAACTGATGCCACCTGGAGAAGGG-----GCCAAGAGGGAGAGCCTCCCACAGTTGA

GGCCAGATACAAGTCTTTTTCTATAAAAAATGCT-AAAAGATAGGAAAGACGGAGTCA--AACAGTATGGACCCAACTCCC  
CTTACATGAGGACATTTATTAGATTCCATTGCTCATGGACAT---AGACTCATTC- TTA--TGATTGGGAGA--TTCTGGC  
AAAATCGTCTTT-CTCACCTC-TCAATTTGTACAATTTAAGACTTGGTG-----GATTGATAGG-----ACAC  
AGAACA

>B131

A-GGCAC---AAGTCTCTTCCAGCAGGTCAGGTGCTGTAACATTACAACCTCAAAGCAGGTTAA-----  
-----  
---AGAAAATAAGACCCAACCGCCAGTAGCCTATCAATACTGGCTCCGGCTGAACTTCAGTATCGGCCACCCCC-AGAA  
AGTCAGTATGGATATCCAGGAATGCCCCAGCACCACAGGGCAG---GGCGCAATACCCTCAGCCGCCACTAGGAGAC  
-----TTAATCCTACGGCACCACCTAGT  
AGACAGGGTAGTGAATTACATGAAATTTATTGATAAA-----TCAAGAAAGGAAGGAGA--TACTGAGGCATGGCA  
ATTCCCAGTAACGTTAGAACCAGTCCACCTGGAGAAGGA-----GCCAAGAGGGAGAGCCTCCCACAGTTGA  
GGCCAGATACAAGTCTTTTTCTGATAAAAAATGCT-AAAAGATATGAAAGAGGGAGTAA--AACAGTATGGACCCAACTCCC  
CTTATATGAGGACATTTATTAGATTCCATTGCTCATGGACAT---AGACTCATTC- TTA--TGATTGGGAGA--TTCTGGC  
AAAATCGTCTCT-CTCACCTC-TCAATTTTACAATTTAAGACTTGGTG-----GATTGATGGG-----GTAC  
AGAACA

>B107

A-GGGCC---AAGTCTCTTCCAGCAGTTCAGATGCCTGTAACATTACAACCTCAAATGCAGGTTAGGCAAGTACAAACC  
CAAAGAGAATATCAAATAGAGAAAGATAGAGTCTCTGTACGGCAATGCCAATCAAATACAGTATCCACAATATCAGCC  
GGTAGAAAATAAGACCCAACCTGCCAGTAGCCTATCAATACTGGCTGCCAGCCGAACTTAAGTGTGCGGCCACCCCC-GGAA  
AATCAGTATGGACAGCCAGGAATGTTCCAGCCCCACAGGACAG---GGCGCATAACCCTCAGCCACCCACTATGAGAC  
-----TTAATCCTACAGCACCACCTAGT  
GAGCAGGGTAGTGTATTACATAAAATTTATTGATGAG-----GCAAGAAAACAAAGAGA--TATTGAGGCATGGCA  
ATTCCCAGTAATATTAGAACCAATACCACCTGGAGAAGGG-----GCCAAGAGGGAGAGCCTCCCCTAGCTGA  
GGCCAGATATGAGTCTTTTTCTGATAAAAAATGCT-AAAAGATATGAAAGAGGGAGTAA--AACAGTATGGACCCAACTCCC  
CTTATATGAGGACATTTATTAGATTCCATTGCTCATGGACAT---AGACTCATTC- TTA--TGATTGGGAGG--TTCTGGC  
CAAATGTCTCT-CTCACCTC-TCAATTTTACAATTTAAGACTTGGTG-----GATTGATGGG-----GCAC  
ACAACA

>B112

A-GGGCC---AAGTCTCTTCCAGCAGTTCAGATGCCTGTAACATTACAACCTCAAATGCAGGTTAGGCAAGTACAAACC  
CAAAGAGAATATCAAATAGAGAAAGATAGAGTCTCTGTACGGCAATGCCAATCAAATACAGTATCCACAATATCAGCC  
GGTAGAAAATAAGACCCAACCTGCCAGTAGCCTATCAATACTGGCTGCCAGCCGAACTTAAGTGTGCGGCCACCCCC-GGAA  
AATCAGTATGGACAGCCAGGAATGTTCCAGCCCCACAGGACAG---GGCGCATAACCCTCAGCCACCCACTATGAGAC  
-----TTAATCCTACAGCACCACCTAGT  
GAGCAGGGTAGTGTATTACATAAAATTTATTGATGAG-----GCAAGAAAACAAAGAGA--TATTGAGGCATGGCA  
ATTCCCAGTAATATTAGAACCAATACCACCTGGAGAAGGG-----GCCAAGAGGGAGAGCCTCCCCTAGCTGA  
GGCCAGATATGAGTCTTTTTCTGATAAAAAATGCT-AAAAGATATGAAAGAGGGAGTAA--AACAGTATGGACCCAACTCCC  
CTTATATGAGGACATTTATTAGATTCCATTGCTCATGGACAT---AGACTCATTC- TTA--TGATTGGGAGG--TTCTGGC  
CAAATGTCTCT-CTCACCTC-TCAATTTTACAATTTAAGACTTGGTG-----GATTGATGGG-----GCAC  
ACAACA

>B15

A-GGACC---AAGTCTCTTCCAGTAGGTGAGTCCGTAACATTACAACCTCAAACGCAGGTTAG-----  
-----  
---AGAAAATAAGACCCAACCTACCAGTAGCTTATCAATACTGGCCGCCGGCCAACTTCAGTATCGGCCACCCCC-AGAA  
AGTCAGTATGGATATCCAGGAACGCTCCAGCACCACAGGGCAG---GGCGCATAACCCTCAGCCACCCACTAGCAGAC  
-----TTAATCCTACAGCACCACCTAGT  
AGACAGGGTAGTGAATTACATGAAATTTATTGATAAG-----TCAAGAAAGGAAGGAGA--CACTGAGGCGTGGCA  
ATTCCCAGTAACGTTAGAACCAGTACCACCTGGAGAAGGA-----GCCAAGAGGGAGAGCCTCTCAGTTGA  
GGCCAGATACAAGTCTTTTTCTGATAAAAAATGCT-AAAAGATATGAAAGAGGGAGTAA--AACACTATGGACCCAACTCCC  
CTTATATGAGGACATTTATTAGATTCCATTGCTCATGGACATCATAGACTCATTC- TTA--TGATTGGGAGA--TTCTGGC  
AAAATCGTCTCT-CTCACCTC-TCAATTTTACAATTTAAGACTTGGTG-----GATTGATGGG-----GCAC  
AGAACA

>B86

A-GGGCC---AAGTCTCTTCCAGCAGGTCAGGTGCCGTAACACTACAACCTCAAACGCAGGTTAA-----  
-----  
---AGAAAATAAGACCCAACCGCCAGTAGCCTATCAATACTGGCTCCGGCTGAACTTCAGTATCGGCCACCCCC-AGAA  
AGTCAGTACGGATATCCAGGAATGCCCCAGCACCACAGGGCAG---GGCGCATAACCCTCAGCTGCCACTAGGAGAC  
-----TTAATCCTACGGCACCACCTAGT  
AGACAGGGTAGTGAATTACATGAAATTTATTGATAAA-----TCAAGAAAGGAAGGAGA--TACTGAGGCATGGCA  
ACTCCCAGTAACGTTAGAACCAGTACCACCTGGAGAAGGA-----GCCAAGAGGGAGAGCCTCCCACAGTTGA  
GGCCAGATACAAGTCTTTTTCTGATAAAAAATGCT-AAAAGATATGAAAGAGGGAGTAA--AACAGTATGGACCCAACTCCC  
CTTATAGGAGGACATTTATTAGATTCCATTGCTCATGGACAT---AGACTCATTCCTTA--TGATTGGGAGA--TTCTGGC  
AAAATCGTCTCT-CTCACCTCCTCAATTTTACA-TTTAAGACTTGGTG-----GATTGATAGA-----GTAC  
AGGAACA

>B86\_B107

A-GGGCC---AAGTCTCTTCCAGCAGGTCAGGTGCCGTAACACTACAACCTCAAACGCAGGTTAA-----  
-----  
---AGAAAATAAGACCCAACCGCCAGTAGCCTATCAATACTGGCTCCGGCTGAACTTCAGTATCGGCCACCCCC-AGAA  
AGTCAGTACGGATATCCAGGAATGCCCCAGCACCACAGGGCAG---GGCGCATAACCCTCAGCCACCCACTATGAGAC  
-----TTAATCCTACAGCACCACCTAGT  
GAGCAGGGTAGTGTATTACATAAAATTTATTGATGAG-----GCAAGAAAACAAAGAGA--TATTGAGGCATGGCA  
ATTCCCAGTAATATTAGAACCAATACCACCTGGAGAAGGG-----GCCAAGAGGGAGAGCCTCCCCTAGCTGA  
GGCCAGATATGAGTCTTTTTCTGATAAAAAATGCT-AAAAGATATGAAAGAGGGAGTAA--AACAGTATGGACCCAACTCCC  
CTTATAGGAGGACATTTATTAGATTCCATTGCTCATGGACAT---AGACTCATTCCTTA--TGATTGGGAGG--TTCTGGC  
AAAATCGTCTCT-CTCACCTCCTCAATTTTACA-TTTAAGACTTGGTG-----GATTGATAGA-----GTAC  
AGGAACA

>B86\_B44

A-GGGCC---AAGTCCTCTTCCAGCAGGTCAGGTGCCCGTAACACTACAACCTCAAACGCAGGTTAA-----  
---AGAAAATAAGACCCAACCGCCAGTAGCCTATCAATACTGGCCTCCGGCTGAACTTCAGTATCGGCCACCCCC-AGAA  
AGTCAGTACGGATATCCAGGAATGCCCCAGCACCACAGGGCAG----GGCGCCATACCCTCAGCTGCCCACTAGGAGAC  
-----TTAATCCTACGGCACCACCTAGT  
AGACAGGGTAGTGAATTACATGAAATATTGATAAA-----TCAAGAAAGGAAGGAGA--TACTGAGGCATGGCA  
ACTCCACAGTAACGTTAGAACCAGATGCCACCTGGAGAAGGA-----GCCAAGAGGGAGAGCCTCCCACAGTTGA  
GGCCAGATACAAGTCTTTTTTCGATAAAAAATGCT-AAAAGATATGAAAGAGGGAGTAA--AACAGTATGGACCCA  
ACTCTCTTATATGAGGACATTATTAGATTCCATTGCTCATGGACAT--AGACTCATTC-TTA--TGATTGGGAGA-  
TTCTGGC  
AAAATCGTCTCT-CTCACCTC-TCAATTTTTACAATTTAAGACTTGGTG-----GATTGATGGG-----GTAC  
AGAACA

>B44\_B45\_B187

A-GGCAC---AAGTCCTCTTCCAGCAGGTCAGGTGCCCGTAAGATTACAACCTCAAACGCAGGTTAA-----  
---AGAAAATAAGACCCAACCGCCAGTAGCTTATCAATACTGGCCGCGGGCTGAACTTCAGTATCGGCCACCCCC-AGAA  
AGTTAGTATGGATATCCAGGAATGCCCCAGCACCACAGGGCAG----GGCGCCATACCCTCAGCCGCCCACTAGGAGAC  
-----TTAATCCTACGGCACCACCTAGT  
AGACAGGGTAGTGAATTACATGAAATATTGATAAA-----TCAAGAAAGGAAGGAGA--TACTGAGGCATGGCA  
ATTCCACAGTAACGTTAGAACCAGATGCCACCTGGAGAAGGA-----GCCAAGAGGGAGAGCCTCTCACAGTTGA  
GGCCAGATACAAGTCTTTTTTCGATAAAAAATGCT-AAAAGATATGAAAGAGGGAGTAA--AACAGTATGGACCCA  
ACTCCC  
CTTATATGAGGACATTATTAGATTCCATTGCTTATGGACAT--AGACTCATTC-TTA--TGATTGGGAGA-  
TTCTGGC  
AAAATCGTCTCT-CTCACCTC-TCAATTTTTACAATTTAAGACTTGGTG-----GATTGATGGG-----GTAC  
AGAACA

>B2\_B15\_B2

A-GAGCC---AAGTCCTTTTCTAGCAGGTCAGATGCCATAACATTACAACCTCAAACGCAGGTTAG-----  
---AGAAAATAAGACCCAACCCAGTAGCTTATCAATACTGGCCACTGGCTGAACTTCAGTATCAGCCACCCCC-AGAA  
AGTCAGTATGGACATCCAGGAATGCTGCCAGCACTACAGAATAG----GGTGCCACACCCTCAGCCGCCCACTTTGAGAC  
-----TTAATCATACGGCACCACCTAGT  
AGACAGGGTAGTGAATTACATGAAATATTGATAAG-----TCAAGAAAGGAAGGAGA--CACTGAGGCATGGCA  
ATTCCACAGTAACGTTAGAACCAGATACCACCTGGAGAAGGA-----GCCAAGAGGGAGAGCCTCTCACAGTTGA  
GGCCAGATACAAGTCTTTTTTCGATAAAAAATGCT-AAAAGATAGGAAAGACGGAGTCA--AACAGTATGGACCCA  
ACTCCC  
CTTACATGAGGACATTATTAGATTCCATTGCTCATGGACAT--AGACTCATTC-TTA--TGATTGGGAGA-  
TTCTGGC  
AAAATCGTCTTT-CTCACCTC-TCAATTTGTACAATTTAAGACTTGGTG-----GATTGATAGG-----ACAC  
AGAACA

>B112\_B131

A-GGGCC---AAGTCCTCTTCCAGCAGTTCAGATGCCGTGTAACATTACAACCTCAAATGCAGGTTAGGCAAGTACAAACC  
CCAAGAGAATATCAAATAGAGAAAGATAGAGTCTCTGTACGGCAATGCCAATCAAATACAGTATCCACAATATCAGCC  
GGTAGAAAATAAGACCCAACCTGCCAGTAGCCTATCAATACTGGCTGCCAGCCGAACTTAAGTGTCCGCCACCCCC-GGAA  
AATCAGTATGGACAGCCAGGAATGTTCCAGCCCCACAGGACAG----GGCGCAATACCCTCAGCCGCCCACTAGGAGAC  
-----TTAATCCTACGGCACCACCTAGT  
AGACAGGGTAGTGAATTACATGAAATATTGATAAA-----TCAAGAAAGGAAGGAGA--TACTGAGGCATGGCA  
ATTCCACAGTAACGTTAGAACCAGATACCACCTGGAGAAGGA-----GCCAAGAGGGAGAGCCTCCCACAGTTGA  
GGCCAGATACAAGTCTTTTTTCGATAAAAAATGCT-AAAAGATATGAAAGAGGGAGTAA--AACAGTATGGACCCA  
ACTCCC  
CTTATATGAGGACATTATTAGATTCCATTGCTCATGGACAT--AGACTCATTC-TTA--TGATTGGGAGA-  
TTCTGGC  
AAAATCGTCTCT-CTCACCTC-TCAATTTTTACAATTTAAGACTTGGTG-----GATTGATGGG-----GTAC  
AGAACA

>B443

A-GGACC---AAGTCCTCTTCCAGTAGGTCAGATGCCCGTAACATTACAACCTCAAACGCAGGTTAG-----  
---AGAAAATAAGACCCAACCTACCAGTAGCTTATCAATACTGGCCGCGGGCCAACTTCAGTATCGGCCACCCCC-AGAA  
AGTCAGTATGGATATCCAGGAACGCTCCAGCACCACAGGGCAG----GGTGCCATACCCTCAGCCACCCACTAGCAGAC  
-----TTAGTCATACGGCACCACCTAGT  
AGACAGGGTGGTGAATTACATGAAATATTGATAAG-----TCAAGAAAGGAAGGAGA--CACTGAGGCATGGCA  
ATTCCACAGTAACGTTAGAACCAGATACCACCTGGAGAAGGA-----GCCAAGAGGGAGAGCCTCTCACAGTTGA  
GGCCAGATACAAGTCTTTTTTCGATAAAAAATGCT-AAAAGATATGAAAGAGGGAGTAA--AACACTATGGACCCA  
ACTCCC  
CTTATATGAGGACATTATTAGATTCCATTGCTCATGGACATCATAGACTCATTC-TTA--TGATTGGGAGA-  
TTCTGGC  
AAAATCGTCTCT-CTCACCTC-TCAATTTTTACAATTTAAGACTTGGTG-----GATTGATGGG-----GCAC  
AGAACA

>B474

A-GGCAC---AAGTCCTCTTCCAGCAGGTCAGGTGCCGTGTAACATTACAACCTCAAACGCAGGTTAA-----  
---AGAAAATAAGACCCAACCGCCAGAGCTTATCAATACTGGCCGCGGGCTGAACTTCAGTATCAGCCACCCCC-AGAA  
AGTCAGTATGGATATCCAGGAATACCCCCAGCACCACAGGGCAG----GGCGCCATACCCTCAGCTGCCCACTAGGAGAC  
-----TTAATCCTACGGCACCACCTAGT  
AGACAGGGTAGTGAATTACATGAAATATTGATAAA-----CCAAGAAAGGAAGGAGA--TACTGAGGCATGGCA  
ATTCCACAGTAACATTAGAACCAGATGCCAAGTGGAGAAGGA-----GCCAAGAGGGAGAGCCTCCCACAGTTGA  
GGCCAGATACAAGTCTTTTTTCGATAAAAAATGCT-AAAAGATATGAAAGAGGGAGTAA--AACAGTATGGACCCA  
ACTCCC  
CTTATATGAGGACATTATTAGATTCCATTGCTCATGGACAT--AGACTCATTC-TTA--TGATTGGGAGA-  
TTCTGGC  
AAAATCGTCTCT-CTCACCTC-TCAATTTTTACAATTTAAGACTTGGTG-----GATTGATAGA-----GTAC  
AGAACA

>B443\_B474

A-GGACC---AAGTCCTCTTCCAGTAGGTCAGATGCCCGTAACATTACAACCTCAAACGCAGGTTAG-----  
---AGAAAATAAGACCCAACCTACCAGTAGCTTATCAATACTGGCCGCGGGCCAACTTCAGTATCGGCCACCCCC-AGAA

AGTCAGTATGGATATCCAGGAACGCTCCAGCACCACAGGGCAG----GGTGCCATACCCTCAGCCACCCACTAGCAGAC  
-----TTAGTCATACGGCACCACCTAGT  
AGACAGGGTAGTGAATTACATGAAATTATTGATAAA-----CCAAGAAAGGAAGGAGA--TACTGAGGCGTGGCA  
ATTCCCAGTAACATTAGAACCGATGCCAACTGGAGAAGGA-----GCCCAAGAGGGAGAGCCTCCCACAGTTGA  
GGCCAGATACAAGTCTTTTTCGATAAAAATGCT-AAAAGATATGAAAGAGGGAGTAA--AACAGTATGGACCCAACTCCC  
CTTATATGAGGACATTATTAGATTCATTGCTCATGGACAT---AGACTCATTC- TTA--TGATTGGGAGA-TTCTGGC  
AAAATCGTCTCT-CTCACCTC-TCAATTTTACAATTTAAGACTTGGCG-----GATTGATAGA-----GTAC  
AGAACA

### **Reproduction of HERV-K(HML-2) gag sequence recombinants**

We aimed to reproduce recombination events between HML-2 *gag* sequences in an *in vitro/ex vivo* approach. We utilized different HML-2 *gag* sequences that we had cloned in the course of the experiment (see manuscript text). The *gag* sequences differed from each other by presence of unique restriction enzyme sites at the 5' or the 3' end of the sequence. Specifically, *gag* sequence B280 uniquely displayed an HindIII site at the 5' end. Sequence B255 uniquely displayed an RsrII site at the 3' end. Sequence B15 uniquely displayed a PflFI site at the 5' end (Suppl. Fig. A).

We produced RNA from those cloned *gag* sequences using the SP6/T7 Transcription Kit (Roche). We purified the RNA using the RNeasy Mini Kit (Qiagen) columns. We eliminated plasmid template DNA by DNase I treatment using Turbo DNA-free (Ambion Inc.) and following recommendations for rigorous DNase treatment. We generated cDNA from mixed equal amounts of RNA from clones B255 and B15 and from clones B255 and B280. RNA's were diluted at 1:1000 and about 1.5 ng of each diluted RNA were included in mixed cDNA synthesis. We used the Omniscript RT Kit (Qiagen Inc.). An RT negative control was also included at that point. Kits were used according to the manufacturers' recommendations. We subjected cDNA and RT(-) control to a standard PCR employing *gag* primers (see manuscript text). We proceeded further only when the negative control displayed no product. We cloned PCR products into pGEM T-Easy (Promega) and prepared plasmid DNA from 200 (100 per mixed RNA's ) clones using a standard miniprep procedure. We double-digested plasmid DNAs with appropriate restriction enzymes, followed by agarose gelelectrophoresis of restriction fragments.

Out of 100 analysed plasmid clones for mixture B255/B15, we identified 6 clones producing DNA fragments characteristic of recombination of two restriction enzyme sites in one sequence. We identified 8 clones that could not be digested at all, indicating recombination-mediated elimination of restriction enzyme sites (Suppl. Fig. B). Out of 100 analysed plasmid clones for mixture B255/B280, we identified 3 clones that indicated recombination of restriction enzyme sites, and 4 clones that indicated elimination of sites.

Taken together, 21 out of 200 plasmid clones (=10.5%) showed clear signs of recombination events. Thus, recombination events observed in the HERV-K(HML-2) expression analysis, and resulting in HERV-KX sequences, could be reproduced in an *in vitro/ex vivo* approach.

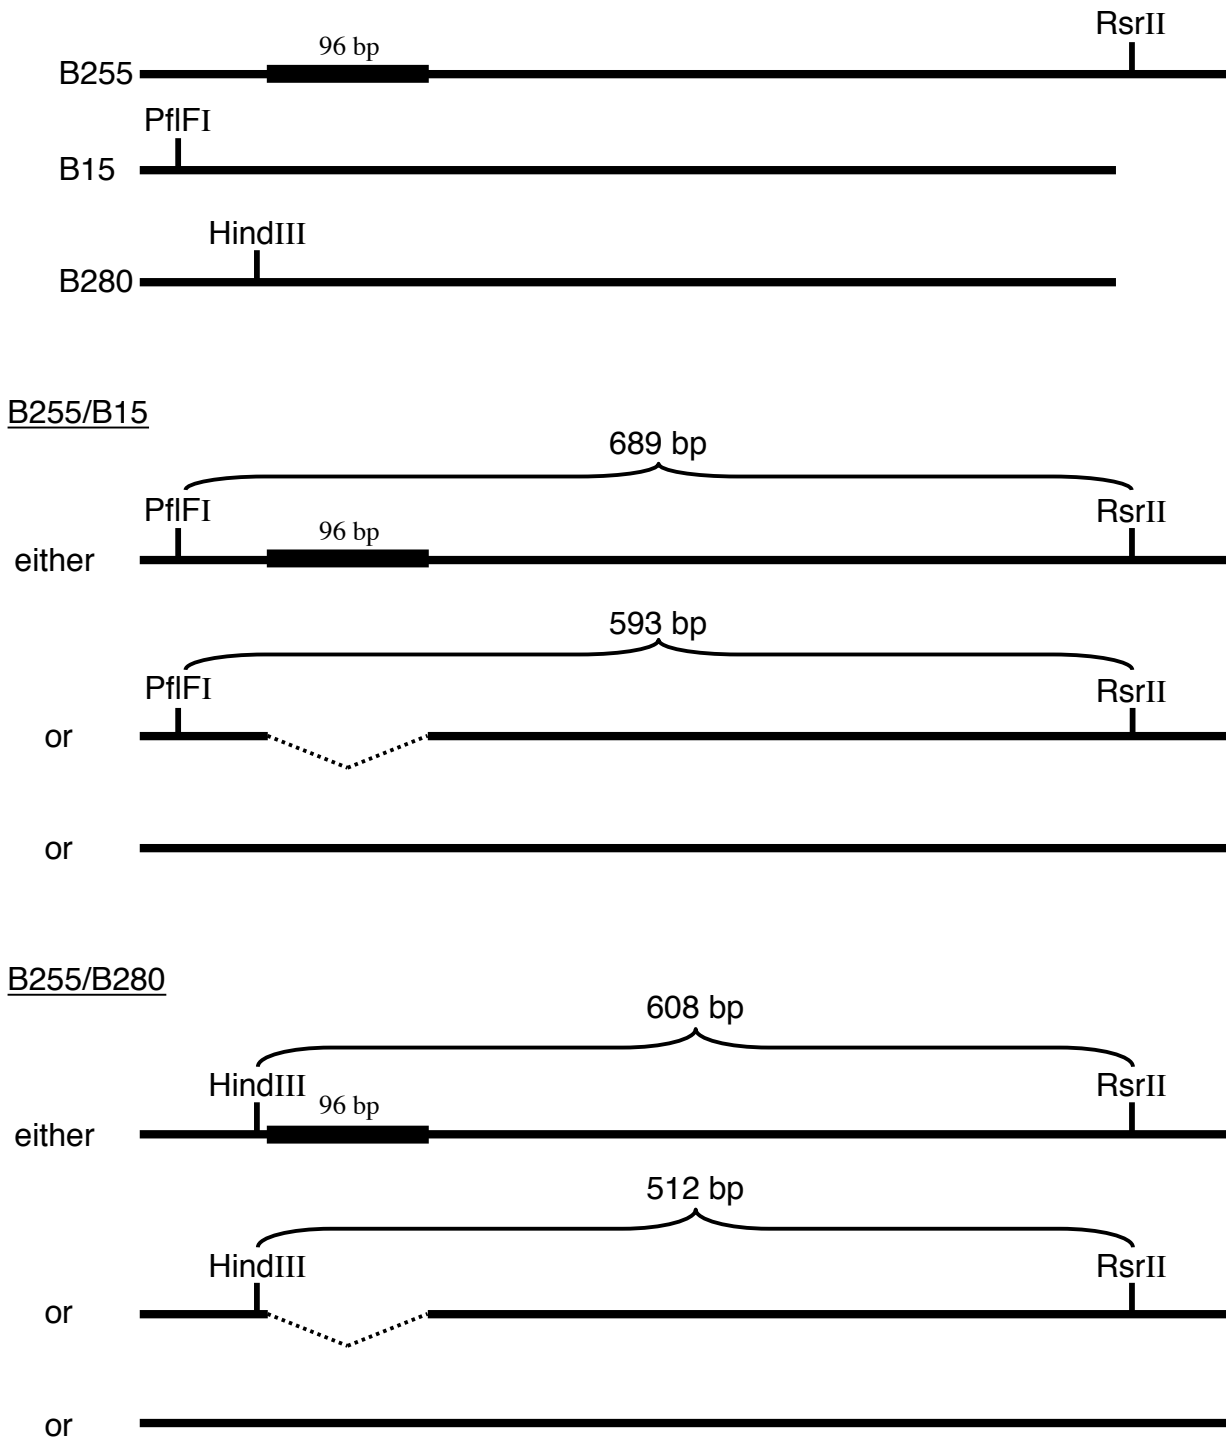

Suppl. Fig. A: Depiction of different HML-2 *gag* sequences employed to reproduce/screen recombinations *in vitro/ex vivo*. B255, B15 and B280 represent different *gag* sequences cloned into the pGEM T-Easy vector (Promega). B255 stems from locus 7\_450 that is an HERV-K(OLD) provirus and that harbors a 96 bp insertion in its 5' region compared to B15 and B280 that stem from modern HML-2 proviruses (see manuscript text). The different *gag* sequences harbor unique restriction enzyme sites near their 5' or 3' ends. In the course of the *in vitro/ex vivo* experiment, recombinations result in combination of those sites within a clone, or in removal of those sites, depending on the direction of chimera formation. All three restriction enzymes do not cut the plasmid vector backbone. Indicated lengths of restriction fragments depend on presence/absence of the 96 bp sequence, and on direction and location of the recombination. We assayed RNA mixtures of clones B255/B15 and B255/B280. *Gag* sequences and location of restriction sites are not drawn to scale.

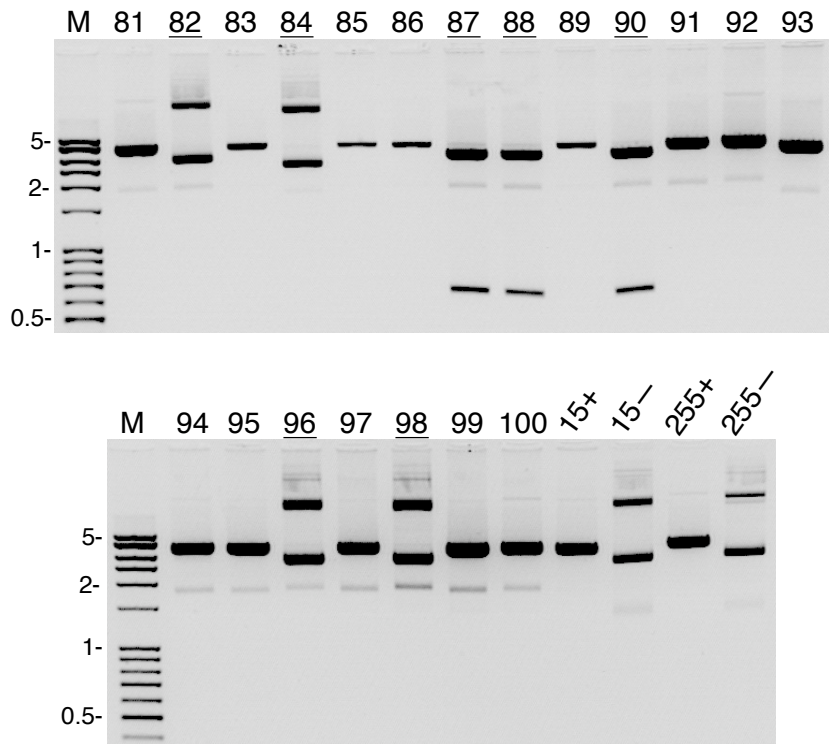

Suppl. Fig. B: Results of restriction enzyme-mediated screening for *in vitro/ex vivo* recombinants. Exemplarily shown are results for digestions of plasmid clones with PflFI and RsrII. As depicted in Suppl. Fig A, a restriction fragment of 689 bp or 593 bp is characteristic of recombination of both restriction sites in one plasmid clone (87, 88, 90), while undigestible plasmids indicate recombination-mediated elimination of both restriction sites from the plasmid clone (82, 84, 96, 98). Controls for properly digested plasmid B15+, B255+) and for undigested plasmid (15-, 255-) were included.
